# Supplementary material for: Identification and reconstitution of the rubber biosynthetic machinery on rubber particles from Hevea brasiliensis
Source: eLife. 2016 Oct 28;5:e19022. doi: 10.7554/eLife.19022 (PMC5110245; doi:10.7554/eLife.19022)
Supplement: Figure 2—source data 2. — RPs, rubber particles. DOI: http://dx.doi.org/10.7554/eLife.19022.005 [file elife-19022-fig2-data2.xlsx]

## Sheet: All_list
Figure1–source data2. Proteins identified in the proteomics of the detergent-washed RPs.
								Primary Structure Information			BLASTP search against NR database						BLASTP search against TAIR10-pep database						BLASTP search against Swiss-Prot database
Entry No.	Family	Member	Accession	Score	Mass	Sequences	emPAI	Length	M.W. [Da]	pI	Beat Hit IDs	Best Hit Definition	Alignment Length	Identity	Bit Score	E-value	Beat Hit IDs	Best Hit Definition	Alignment Length	Identity	Bit Score	E-value	Beat Hit IDs	Best Hit Definition	Alignment Length	Identity	Bit Score	E-value
1	1	1	JT948852.1_c2	5669	21625	7	4.1	203	21637.7	4.82	gi|37901161|gb|AAP46159.1|	REF-like stress related protein 1 [Hevea brasiliensis].	99	52.53	103	2e-24	AT3G05500.1	Rubber elongation factor protein (REF)	110	40	90.9	8e-22	sp|Q9SW70|SRP_VITRI	Stress-related protein [Vitis riparia]	94	47.87	97.8	4e-23
2	2	1	JT939480.1_c1	4652	26150	9	2.88	242	26108.6	7.35	gi|37901161|gb|AAP46159.1|	REF-like stress related protein 1 [Hevea brasiliensis].	174	54.6	169	8e-49	AT3G05500.1	Rubber elongation factor protein (REF)	120	54.17	105	1e-26	sp|P15252|REF_HEVBR	Rubber elongation factor protein [Hevea]	124	48.39	112	4e-29
3	2	2	JT942555.1_c1	4567	23621	9	3.46	222	23577.7	5.09	gi|37901161|gb|AAP46159.1|	REF-like stress related protein 1 [Hevea brasiliensis].	174	54.6	168	5e-49	AT3G05500.1	Rubber elongation factor protein (REF)	120	54.17	105	6e-27	sp|P15252|REF_HEVBR	Rubber elongation factor protein [Hevea]	124	48.39	111	3e-29
4	3	1	JT951018.1_2	2640	14713	8	5.55	138	14721.6	4.79	gi|132270|sp|P15252.2|REF_HEVBR	RecName: Full=Rubber elongation factor protein; Short=REF; AltName:	138	100	277	2e-93	AT3G05500.1	Rubber elongation factor protein (REF)	118	48.31	100	4e-26	sp|P15252|REF_HEVBR	Rubber elongation factor protein [Hevea]	138	100	277	5e-95
5	4	1	JT940643.1_c1	2301	41234	10	2.7	374	41202.3	9.03	gi|387778880|gb|AFJ97274.1|	beta-1,3-glucanase [Hevea brasiliensis].	374	99.73	765	0	AT4G16260.1	Glycosyl hydrolase superfamily protein	342	64.62	461	7e-162	sp|P52407|E13B_HEVBR	Glucan endo-1,3-beta-glucosidase, basic vacuolar isoform [Hevea brasiliensis]	374	95.99	712	0
6	5	1	JT945746.1_2	2238	29535	15	11.59	257	29383.2	8.69	gi|255556087|ref|XP_002519078.1|	conserved hypothetical protein [Ricinus communis].	231	65.37	319	2e-106	AT1G11755.1	Undecaprenyl pyrophosphate synthetase family protein	234	50.85	251	2e-82	sp|Q96E22|NGBR_HUMAN	Nogo-B receptor [Homo sapiens]	197	23.86	72	2e-13
7	6	1	JT934730.1_1	1516	48604	12	2.04	444	48348.5	4.94	gi|224078263|ref|XP_002305512.1|	predicted protein [Populus trichocarpa].	450	71.33	634	0	AT2G17840.1	Senescence/dehydration-associated protein-related	445	56.85	489	7e-170	sp|Q8R1X6|SPG20_MOUSE	Spartin [Mus musculus]	221	25.79	54.3	2e-06
8	6	2	JT948017.1_c1	208	24159	2	0.34	224	24002.7	10.73	gi|255577538|ref|XP_002529647.1|	conserved hypothetical protein [Ricinus communis].	197	88.32	367	8e-123	AT2G17840.1	Senescence/dehydration-associated protein-related	221	75.11	351	2e-119	sp|Q8N0X7|SPG20_HUMAN	Spartin [Homo sapiens]	187	25.67	48.9	1e-05
9	7	1	JT927700.1_c3	1627	56162	25	7.33	500	55968.7	8.27	gi|255576897|ref|XP_002529334.1|	cytochrome P450, putative [Ricinus communis].	502	77.69	808	0	AT4G15440.1	hydroperoxide lyase 1	384	60.94	501	1e-174	sp|P48417|CP74_LINUS	Allene oxide synthase, chloroplastic [Linum usitatissimum]	485	41.03	407	1e-134
10	8	1	JT949604.1_3	1093	22331	9	3.15	204	22344.4	4.53	gi|14423933|sp|O82803.1|SRPP_HEVBR	RecName: Full=Small rubber particle protein; Short=SRPP; AltName:	204	100	403	6e-141	AT3G05500.1	Rubber elongation factor protein (REF)	218	53.67	207	2e-66	sp|O82803|SRPP_HEVBR	Small rubber particle protein [Hevea brasiliensis]	204	100	403	1e-142
11	9	1	JT940751.1_c1	801	37785	4	0.46	345	37466.2	6.78	gi|225467859|ref|XP_002271974.1|	PREDICTED: chlorophyllase-1 [Vitis vinifera].	306	59.48	340	5e-112	AT1G19670.1	chlorophyllase 1	337	43.62	256	5e-82	sp|Q9LE89|CLH0_CHEAL	Chlorophyllase type 0 [Chenopodium album]	320	47.19	273	2e-87
12	10	1	JT937869.1_c3	558	23973	7	1.81	216	23816.7	8.02	gi|871510|emb|CAA90080.1|	small GTP-binding protein [Pisum sativum].	216	92.13	419	8e-147	AT5G59840.1	Ras-related small GTP-binding family protein	206	95.15	404	9e-144	sp|P28186|RAE1C_ARATH	Ras-related protein RABE1c [Arabidopsis thaliana]	206	94.17	402	8e-142
13	10	2	JT944521.1_c3	519	23958	7	1.81	216	23801.7	8.02	gi|327505553|gb|AEA92304.1|	Rab2 [Hevea brasiliensis].	216	100	445	3e-157	AT5G59840.1	Ras-related small GTP-binding family protein	206	96.12	408	3e-145	sp|P28186|RAE1C_ARATH	Ras-related protein RABE1c [Arabidopsis thaliana]	206	95.15	405	3e-143
14	10	3	JT947009.1_3	517	24043	7	1.8	216	23886.8	8.44	gi|327505559|gb|AEA92307.1|	Rab3 [Hevea brasiliensis].	216	100	446	2e-157	AT5G59840.1	Ras-related small GTP-binding family protein	206	94.66	403	2e-143	sp|P28186|RAE1C_ARATH	Ras-related protein RABE1c [Arabidopsis thaliana]	206	93.69	401	1e-141
15	10	4	JT946657.1_3	508	24056	7	1.8	216	23899.8	8.02	gi|302595187|gb|ADL59582.1|	Rab1 [Hevea brasiliensis].	216	99.54	444	1e-156	AT5G59840.1	Ras-related small GTP-binding family protein	206	95.63	406	1e-144	sp|P28186|RAE1C_ARATH	Ras-related protein RABE1c [Arabidopsis thaliana]	206	94.66	404	9e-143
16	10	5	JT950598.1_c2	425	22771	5	1.54	202	22500.4	5.06	gi|327505561|gb|AEA92308.1|	Rab4 [Hevea brasiliensis].	202	100	418	4e-147	AT3G11730.1	Ras-related small GTP-binding family protein	204	86.27	362	8e-128	sp|Q9ZRE2|RABD1_ARATH	Ras-related protein RABD1 [Arabidopsis thaliana]	204	86.27	362	1e-126
17	10	6	JT945059.1_c1	357	22833	6	1.53	203	22619.3	5.06	gi|390979747|gb|AFM30910.1|	small GTPase [Hevea brasiliensis].	203	100	425	1e-149	AT4G17530.1	RAB GTPase homolog 1C	203	91.63	390	9e-139	sp|Q05737|YPTM2_MAIZE	GTP-binding protein YPTM2 [Zea mays]	203	93.6	399	3e-141
18	10	7	JT944033.1_c3	246	22796	4	0.86	203	22582.3	5.05	gi|224074217|ref|XP_002304305.1|	predicted protein [Populus trichocarpa].	203	94.58	405	4e-142	AT1G02130.1	RAS 5	203	89.66	392	2e-139	sp|P28188|RAD2A_ARATH	Ras-related protein RABD2a [Arabidopsis thaliana]	203	89.66	392	3e-138
19	10	8	JT941172.1_c1	241	23201	6	1.91	208	23101.2	8.65	gi|460367695|ref|XP_004229706.1|	PREDICTED: ras-related protein RABH1b-like [Solanum lycopersicum].	208	96.15	414	2e-145	AT2G44610.1	Ras-related small GTP-binding family protein	208	93.27	403	2e-143	sp|O80501|RAH1B_ARATH	Ras-related protein RABH1b [Arabidopsis thaliana]	208	93.27	403	2e-142
20	10	9	JT945574.1_2	113	23912	2	0.35	210	23584.8	6.04	gi|224062966|ref|XP_002300952.1|	predicted protein [Populus trichocarpa].	207	95.17	407	2e-142	AT1G43890.3	RAB GTPASE HOMOLOG B18	200	92	376	7e-133	sp|O23657|RABC1_ARATH	Ras-related protein RABC1 [Arabidopsis thaliana]	200	92	376	9e-132
21	11	1	JT924151.1_c2	495	57374	12	1.57	503	57011.4	6.57	gi|255543106|ref|XP_002512616.1|	interferon-induced GTP-binding protein mx, putative [Ricinus	503	77.34	821	0	AT1G60500.1	Dynamin related protein 4C	501	56.49	589	0	sp|Q9ZP55|DRP4C_ARATH	Dynamin-related protein 4C [Arabidopsis thaliana]	501	56.49	589	0
22	12	1	JT957715.1_2	482	17567	8	3.93	154	17463.9	4.7	gi|37901161|gb|AAP46159.1|	REF-like stress related protein 1 [Hevea brasiliensis].	178	53.93	173	5e-52	AT3G05500.1	Rubber elongation factor protein (REF)	110	56.36	105	1e-27	sp|O82803|SRPP_HEVBR	Small rubber particle protein [Hevea brasiliensis]	105	56.19	115	6e-31
23	13	1	JT945402.1_1	434	22048	11	6.98	193	22005.2	7.65	gi|225437537|ref|XP_002275765.1|	PREDICTED: GTP-binding protein SAR1A [Vitis vinifera].	193	98.96	393	1e-137	AT4G02080.1	secretion-associated RAS super family 2	193	94.82	383	2e-136	sp|O04834|SAR1A_ARATH	GTP-binding protein SAR1A [Arabidopsis thaliana]	193	94.82	383	3e-135
24	13	2	JT943935.1_c1	359	22140	8	3.94	193	22096.4	6.96	gi|255548481|ref|XP_002515297.1|	GTP-binding protein sar1, putative [Ricinus communis].	193	97.93	390	3e-136	AT4G02080.1	secretion-associated RAS super family 2	193	93.78	381	2e-135	sp|O04834|SAR1A_ARATH	GTP-binding protein SAR1A [Arabidopsis thaliana]	193	93.78	381	2e-134
25	14	1	JT943210.1_3	421	33996	7	1.58	310	33618	8.43	gi|20981684|sp|P23472.2|CHLY_HEVBR	RecName: Full=Hevamine-A; Includes: RecName: Full=Chitinase;	310	99.35	633	0	AT5G24090.1	chitinase A	299	70.23	445	5e-157	sp|P23472|CHLY_HEVBR	Hevamine-A [Hevea]	310	99.35	633	0
26	15	1	JT948343.1_1	399	19613	7	2.5	175	19624.9	4.86	gi|38122474|gb|AAR11448.1|	rubber elongation factor [Hevea brasiliensis].	175	99.43	347	4e-120	AT3G05500.1	Rubber elongation factor protein (REF)	111	55.86	105	2e-27	sp|P15252|REF_HEVBR	Rubber elongation factor protein [Hevea]	133	54.14	139	3e-40
27	16	1	JT927427.1_c1	345	52802	6	0.61	478	52492.4	4.69	gi|255555707|ref|XP_002518889.1|	UBX domain-containing protein, putative [Ricinus communis].	485	83.09	704	0	AT4G10790.1	UBX domain-containing protein	495	68.08	632	0	sp|Q6GQ69|FAF2B_XENLA	FAS-associated factor 2-B [Xenopus laevis]	480	30.83	204	3e-58
28	16	2	JT938193.1_3	268	36047	5	0.81	313	35898.1	4.96	gi|255555707|ref|XP_002518889.1|	UBX domain-containing protein, putative [Ricinus communis].	314	89.81	514	9e-179	AT4G10790.1	UBX domain-containing protein	316	75.63	472	5e-165	sp|Q6GQ69|FAF2B_XENLA	FAS-associated factor 2-B [Xenopus laevis]	317	35.65	175	3e-49
29	17	1	JT920903.1_2	317	66450	8	0.54	608	65978.3	7.96	gi|224101561|ref|XP_002312331.1|	predicted protein [Populus trichocarpa].	608	96.88	1192	0	AT5G49460.1	ATP citrate lyase subunit B 2	608	93.59	1144	0	sp|Q93VT8|ACLB1_ORYSJ	ATP-citrate synthase beta chain protein 1 [Oryza sativa subsp. japonica]	608	93.26	1157	0
30	18	1	JT952583.1_c2	256	23563	6	1.46	211	23349.2	7.96	gi|255570175|ref|XP_002526048.1|	protein with unknown function [Ricinus communis].	210	97.62	430	2e-151	AT4G35860.1	GTP-binding 2	211	91.94	413	1e-147	sp|Q38922|RAB1B_ARATH	Ras-related protein RABB1b [Arabidopsis thaliana]	211	91.94	413	2e-146
31	18	2	JT941238.1_3	192	10671	4	2.58	100	10506.7	5.69	gi|255568502|ref|XP_002525225.1|	protein with unknown function [Ricinus communis].	100	99	207	4e-66	AT4G17170.1	RAB GTPase homolog B1C	99	96.97	202	2e-66	sp|P92963|RAB1C_ARATH	Ras-related protein RABB1c [Arabidopsis thaliana]	99	96.97	202	2e-65
32	19	1	JT943972.1_1	300	23324	9	3.56	206	22996.7	4.81	gi|224103431|ref|XP_002313053.1|	predicted protein [Populus trichocarpa].	206	98.54	424	3e-149	AT3G18820.1	RAB GTPase homolog G3F	206	93.2	404	4e-144	sp|P31022|RAB7_PEA	Ras-related protein Rab7 [Pisum]	206	95.15	412	4e-146
33	19	2	JT944915.1_c2	260	23297	8	2.92	206	22969.7	4.69	gi|224103431|ref|XP_002313053.1|	predicted protein [Populus trichocarpa].	206	97.57	421	7e-148	AT3G18820.1	RAB GTPase homolog G3F	206	93.2	403	7e-144	sp|P31022|RAB7_PEA	Ras-related protein Rab7 [Pisum]	206	93.69	407	2e-144
34	20	1	JT937325.1_3	296	33119	6	0.91	284	32797.8	8.11	gi|16751461|dbj|BAB71777.1|	cis-prenyltransferase [Hevea brasiliensis].	284	97.54	577	0	AT2G17570.1	Undecaprenyl pyrophosphate synthetase family protein	271	56.83	316	7e-107	sp|Q8W3U4|HRT2_HEVBR	Rubber cis-polyprenyltransferase HRT2 [Hevea brasiliensis]	284	97.54	574	0
35	21	1	JT934302.1_2	294	31528	5	0.76	274	31320	8.99	gi|55831356|gb|AAV66577.1|	lipase [Ricinus communis].	270	57.78	354	5e-116	AT3G14360.1	alpha/beta-Hydrolases superfamily protein	273	50.55	276	8e-89	sp|B8NIB8|FAEA_ASPFN	Probable feruloyl esterase A [Aspergillus flavus (strain ATCC 200026 / FGSC A1120 / NRRL 3357 / JCM 12722 / SRRC 167)]	158	28.48	58.2	1e-08
36	22	1	JT928130.1_1	272	41897	7	0.82	377	41695.4	5.16	gi|224055984|ref|XP_002298710.1|	actin 1 [Populus trichocarpa].	377	100	784	0	AT5G09810.1	actin 7	377	98.67	775	0	sp|P53492|ACT7_ARATH	Actin-7 [Arabidopsis thaliana]	377	98.67	775	0
37	23	1	JT949354.1_c3	262	20724	8	3.6	183	20623.2	8.22	gi|313586569|gb|ADR71295.1|	hypothetical protein 19 [Hevea brasiliensis].	183	100	379	2e-132	AT2G39050.1	hydroxyproline-rich glycoprotein family protein	155	66.45	219	3e-70	sp|D5UJ42|MSHA_CELFN	D-inositol 3-phosphate glycosyltransferase [Cellulomonas flavigena (strain ATCC 482 / DSM 20109 / NCIB 8073 / NRS 134)]	45	37.78	35	0.27
38	24	1	JT960545.1_2	223	23777	4	0.81	201	23507.4	8.7	gi|55831356|gb|AAV66577.1|	lipase [Ricinus communis].	192	44.27	168	7e-46	AT3G14360.1	alpha/beta-Hydrolases superfamily protein	193	39.38	130	4e-35	sp|A7MP70|DAPA_CROS8	4-hydroxy-tetrahydrodipicolinate synthase [Cronobacter sakazakii (strain ATCC BAA-894)]	37	32.43	32.3	2.2
39	25	1	JT954366.1_3	219	18397	5	2.79	172	18180.7	9.33	gi|167599641|gb|ABZ88806.1|	cyclophilin [Hevea brasiliensis].	172	100	353	2e-122	AT2G16600.1	rotamase CYP 3	170	85.29	308	2e-107	sp|Q39613|CYPH_CATRO	Peptidyl-prolyl cis-trans isomerase [Catharanthus roseus]	172	90.7	326	3e-113
40	26	1	JT946133.1_c3	213	24347	4	0.79	216	24019.8	4.27	gi|255542728|ref|XP_002512427.1|	Rubber elongation factor protein, putative [Ricinus communis].	231	50.65	204	4e-62	AT3G05500.1	Rubber elongation factor protein (REF)	217	43.78	161	3e-48	sp|O82803|SRPP_HEVBR	Small rubber particle protein [Hevea brasiliensis]	205	49.76	182	1e-55
41	27	1	JT939205.1_c1	211	27055	6	1.2	243	26957.6	6.8	gi|255542728|ref|XP_002512427.1|	Rubber elongation factor protein, putative [Ricinus communis].	240	84.58	413	9e-144	AT3G05500.1	Rubber elongation factor protein (REF)	227	69.16	318	6e-109	sp|Q9MA63|Y3550_ARATH	REF/SRPP-like protein At3g05500 [Arabidopsis thaliana]	227	69.16	318	9e-108
42	28	1	JT933643.1_c2	204	40768	6	0.85	345	40452.3	6.92	gi|255547988|ref|XP_002515051.1|	conserved hypothetical protein [Ricinus communis].	347	74.06	553	0	AT3G01680.1	-	357	42.02	288	4e-90	sp|Q0JIL1|NRX2_ORYSJ	Probable nucleoredoxin 2 [Oryza sativa subsp. japonica]	114	28.07	47.4	0.0001
43	28	2	JT921591.1_c3	151	81552	6	0.31	712	80918.8	6.62	gi|255547988|ref|XP_002515051.1|	conserved hypothetical protein [Ricinus communis].	714	78.85	1170	0	AT3G01680.1	-	709	43.44	599	0	sp|Q0JIL1|NRX2_ORYSJ	Probable nucleoredoxin 2 [Oryza sativa subsp. japonica]	89	33.71	55.1	1e-06
44	28	3	JT920223.1_c2	137	73027	6	0.35	628	72388.9	6.74	gi|255547988|ref|XP_002515051.1|	conserved hypothetical protein [Ricinus communis].	630	76.83	1023	0	AT3G01680.1	-	644	42.08	528	2e-178	sp|Q0JIL1|NRX2_ORYSJ	Probable nucleoredoxin 2 [Oryza sativa subsp. japonica]	150	26	53.5	3e-06
45	29	1	JT944240.1_c3	198	24305	5	1.07	218	24206	5.42	gi|255562484|ref|XP_002522248.1|	protein with unknown function [Ricinus communis].	218	99.54	445	5e-157	AT5G45750.1	RAB GTPase homolog A1C	218	87.16	394	1e-139	sp|Q9FK68|RAA1C_ARATH	Ras-related protein RABA1c [Arabidopsis thaliana]	218	87.16	394	2e-138
46	29	2	JT948813.1_3	189	22056	5	1.22	201	21955.7	6.53	gi|224113085|ref|XP_002316386.1|	predicted protein [Populus trichocarpa].	199	93.47	393	5e-137	AT3G54840.1	Ras-related small GTP-binding family protein	202	88.61	368	3e-130	sp|Q9CB01|RABF1_ARATH	Ras-related protein RABF1 [Arabidopsis thaliana]	202	88.61	368	5e-129
47	29	3	JT945020.1_1	177	18166	4	1.16	168	18063.3	7.51	gi|255577452|ref|XP_002529605.1|	protein with unknown function [Ricinus communis].	164	92.07	312	2e-105	AT3G54840.2	Ras-related small GTP-binding family protein	166	87.35	293	3e-101	sp|Q9CB01|RABF1_ARATH	Ras-related protein RABF1 [Arabidopsis thaliana]	166	87.35	293	8e-100
48	29	4	JT945065.1_1	140	21871	3	0.62	200	21770.6	7.25	gi|449455421|ref|XP_004145451.1|	PREDICTED: ras-related protein RABF2b-like [Cucumis sativus].	200	94	391	2e-136	AT5G45130.1	RAB homolog 1	200	88	369	1e-130	sp|P31582|RAF2A_ARATH	Ras-related protein RABF2a [Arabidopsis thaliana]	200	88	369	2e-129
49	29	5	JT950302.1_1	119	24028	4	0.8	215	23871.7	6.54	gi|255570960|ref|XP_002526431.1|	protein with unknown function [Ricinus communis].	215	96.28	429	8e-151	AT1G09630.1	RAB GTPase 11C	217	91.24	402	4e-143	sp|O04486|RAA2A_ARATH	Ras-related protein RABA2a [Arabidopsis thaliana]	217	91.24	402	5e-142
50	30	1	JT965474.1_c3	178	12782	4	1.94	110	12789.6	10.01	gi|224078982|ref|XP_002305706.1|	predicted protein [Populus trichocarpa].	109	85.32	195	1e-61	AT5G46230.1	Protein of unknown function, DUF538	105	64.76	159	3e-50	sp|B1NWJ3|YCF2_MANES	Protein ycf2 [Manihot esculenta]	40	40	32.7	0.48
51	31	1	JT965117.1_c1	177	13973	2	0.64	130	13924.2	10.01	gi|224094027|ref|XP_002310063.1|	predicted protein [Populus trichocarpa].	88	46.59	35	5.4							sp|Q04833|LRP_CAEEL	Low-density lipoprotein receptor-related protein [Caenorhabditis elegans]	122	28.69	36.6	0.032
52	32	1	JT968048.1_c1	167	11739	4	4.73	104	11746.3	4.51	gi|356505647|ref|XP_003521601.1|	PREDICTED: long chain acyl-CoA synthetase 1-like [Glycine max].	104	88.46	200	1e-58	AT2G47240.2	AMP-dependent synthetase and ligase family protein	104	84.62	189	3e-57	sp|O22898|LACS1_ARATH	Long chain acyl-CoA synthetase 1 [Arabidopsis thaliana]	104	84.62	189	4e-56
53	33	1	JT928140.1_c2	160	41003	4	0.55	363	40629.4	7.7	gi|255569305|ref|XP_002525620.1|	alpha-1,3-mannosyltransferase, putative [Ricinus communis].	408	75.25	625	0	AT1G78800.1	UDP-Glycosyltransferase superfamily protein	409	66.75	546	0	sp|Q7KWM5|ALG2_DICDI	Alpha-1,3/1,6-mannosyltransferase ALG2 [Dictyostelium discoideum]	411	42.34	319	4e-104
54	34	1	JT945042.1_c1	158	23417	1	0.35	215	22974.9	5.6	gi|255547343|ref|XP_002514729.1|	RING-H2 finger protein ATL1Q, putative [Ricinus communis].	215	81.86	340	5e-116	AT1G74410.1	RING/U-box superfamily protein	204	66.18	264	2e-88	sp|Q8LBA0|NIPL2_ARATH	NEP1-interacting protein-like 2 [Arabidopsis thaliana]	204	66.18	264	2e-87
55	35	1	JT940444.1_c1	157	36048	5	0.81	322	36012.4	4.64	gi|224095302|ref|XP_002310373.1|	predicted protein [Populus trichocarpa].	304	80.59	493	1e-172	AT2G44060.2	Late embryogenesis abundant protein, group 2	295	74.92	451	5e-159	sp|P46519|LEA14_SOYBN	Desiccation protectant protein Lea14 homolog [Glycine]	137	29.93	79.7	9e-17
56	35	2	JT935349.1_c1	126	35863	4	0.65	322	35828.1	6.14	gi|224095302|ref|XP_002310373.1|	predicted protein [Populus trichocarpa].	311	74.28	459	1e-159	AT2G44060.2	Late embryogenesis abundant protein, group 2	301	67.11	409	2e-142	sp|P46519|LEA14_SOYBN	Desiccation protectant protein Lea14 homolog [Glycine]	129	31.01	77.4	6e-16
57	36	1	JT942256.1_3	141	23154	2	0.36	208	22312.8	6.31	gi|37954952|gb|AAO63574.1|	HEV2.2 [Hevea brasiliensis].	204	100	421	6e-148	AT3G04720.1	pathogenesis-related 4	209	62.2	244	4e-81	sp|P02877|HEVE_HEVBR	Pro-hevein [Hevea brasiliensis]	204	99.02	417	4e-148
58	37	1	JT918183.1_3	135	104855	3	0.11	924	103836	9.29	gi|255570639|ref|XP_002526275.1|	eukaryotic translation initiation factor 2c, putative [Ricinus	909	95.49	1783	0	AT1G48410.1	Stabilizer of iron transporter SufD / Polynucleotidyl transferase	912	85.31	1621	0	sp|O04379|AGO1_ARATH	Protein argonaute 1 [Arabidopsis thaliana]	912	85.31	1621	0
59	38	1	JT942264.1_c1	133	25638	3	0.51	230	25540.2	9.43	gi|255547720|ref|XP_002514917.1|	Small rubber particle protein, putative [Ricinus communis].	229	75.55	327	3e-110	AT1G67360.1	Rubber elongation factor protein (REF)	233	57.08	258	1e-85	sp|Q9FYF7|Y1736_ARATH	REF/SRPP-like protein At1g67360 [Arabidopsis thaliana]	233	57.08	258	1e-84
60	39	1	JT933735.1_c1	128	25104	2	0.33	225	25005.1	6.95	gi|255544246|ref|XP_002513185.1|	protein with unknown function [Ricinus communis].	225	89.78	426	2e-149	AT5G47960.1	RAB GTPase homolog A4C	225	79.56	377	1e-132	sp|Q9FE79|RAA4C_ARATH	Ras-related protein RABA4c [Arabidopsis thaliana]	225	79.56	377	1e-131
61	40	1	JT920502.1_3	128	77111	4	0.21	697	76531.4	7.69	gi|255545494|ref|XP_002513807.1|	long-chain-fatty-acid CoA ligase, putative [Ricinus communis].	697	86.94	1245	0	AT1G77590.1	long chain acyl-CoA synthetase 9	695	75.68	1115	0	sp|Q9CAP8|LACS9_ARATH	Long chain acyl-CoA synthetase 9, chloroplastic [Arabidopsis thaliana]	695	75.68	1115	0
62	41	1	JT948104.1_c1	124	20838	3	0.66	184	20622.8	8.93	gi|255583323|ref|XP_002532424.1|	ADP-ribosylation factor, putative [Ricinus communis].	184	96.2	370	2e-128	AT3G49870.1	ADP-ribosylation factor-like A1C	184	91.3	348	6e-123	sp|Q5ZKQ8|ARL8A_CHICK	ADP-ribosylation factor-like protein 8A [Gallus gallus]	183	63.93	268	6e-90
63	42	1	JT949986.1_c2	120	21143	5	1.31	181	21042.3	8.66	gi|255560623|ref|XP_002521325.1|	abhydrolase domain containing, putative [Ricinus communis].	180	60.56	235	9e-74	AT1G17430.1	alpha/beta-Hydrolases superfamily protein	186	45.7	153	1e-44	sp|Q9BV23|ABHD6_HUMAN	Monoacylglycerol lipase ABHD6 [Homo sapiens]	185	25.95	47.4	2e-05
64	43	1	JT920030.1_3	120	80960	7	0.37	707	80269.2	8.91	gi|255565533|ref|XP_002523757.1|	eukaryotic translation initiation factor 2c, putative [Ricinus	706	75.21	1126	0	AT2G27880.1	Argonaute family protein	713	61.15	902	0	sp|Q9SJK3|AGO5_ARATH	Protein argonaute 5 [Arabidopsis thaliana]	713	61.15	902	0
65	44	1	JT942882.1_2	120	20752	1	0.4	181	20707.6	6.96	gi|353441154|gb|AEQ94161.1|	ADP-ribosylation factor [Elaeis guineensis].	181	100	375	7e-131	AT1G10630.1	ADP-ribosylation factor A1F	181	97.79	370	1e-131	sp|P51823|ARF2_ORYSJ	ADP-ribosylation factor 2 [Oryza sativa subsp. japonica]	181	98.9	374	9e-132
66	45	1	JT945335.1_c1	118	18336	2	0.78	162	18346.6	6.29	gi|255579096|ref|XP_002530396.1|	heat-shock protein, putative [Ricinus communis].	162	90.74	281	3e-94	AT1G53540.1	HSP20-like chaperones superfamily protein	162	72.84	236	3e-79	sp|P05478|HSP16_SOYBN	18.5 kDa class I heat shock protein [Glycine max]	162	80.25	260	1e-87
67	46	1	JT916348.1_c3	116	52650	4	0.32	460	52510.7	9.04	gi|255572477|ref|XP_002527173.1|	conserved hypothetical protein [Ricinus communis].	433	80.6	686	0	AT5G52580.1	RabGAP/TBC domain-containing protein	465	65.81	603	0	sp|Q8TC07|TBC15_HUMAN	TBC1 domain family member 15 [Homo sapiens]	142	49.3	150	5e-38
68	47	1	JT936371.1_1	109	45194	3	0.27	400	44993.9	9.66	gi|449469911|ref|XP_004152662.1|	PREDICTED: abhydrolase domain-containing protein 4-like [Cucumis	397	79.85	670	0	AT4G24160.1	alpha/beta-Hydrolases superfamily protein	368	76.36	604	0	sp|O14249|CLD1_SCHPO	probable cardiolipin-specific deacylase, mitochondrial [Schizosaccharomyces pombe (strain 972 / ATCC 24843)]	341	30.79	153	3e-40
69	48	1	JT968387.1_c1	106	18017	3	0.79	161	17800.3	7.13	gi|255548375|ref|XP_002515244.1|	long-chain-fatty-acid CoA ligase, putative [Ricinus communis].	161	82.61	297	2e-94	AT2G47240.2	AMP-dependent synthetase and ligase family protein	160	70	253	2e-80	sp|O22898|LACS1_ARATH	Long chain acyl-CoA synthetase 1 [Arabidopsis thaliana]	160	70	253	3e-79
70	49	1	JT964269.1_c1	105	19956	2	0.42	174	19797.5	4.78	gi|356534712|ref|XP_003535896.1|	PREDICTED: long chain acyl-CoA synthetase 1-like [Glycine max].	174	78.16	294	5e-93	AT2G47240.2	AMP-dependent synthetase and ligase family protein	174	68.39	252	1e-79	sp|O22898|LACS1_ARATH	Long chain acyl-CoA synthetase 1 [Arabidopsis thaliana]	174	68.39	252	2e-78
71	50	1	JT918520.1_c2	103	92529	4	0.17	808	92016.7	5.9	gi|255553165|ref|XP_002517625.1|	phopholipase d alpha, putative [Ricinus communis].	808	89.23	1543	0	AT1G52570.1	phospholipase D alpha 2	810	80.86	1406	0	sp|Q41142|PLDA1_RICCO	Phospholipase D alpha 1 [Ricinus communis]	808	88.99	1538	0
72	51	1	JT920291.1_2	96	87292	2	0.09	757	86149.8	6.54	gi|122210890|sp|Q2XPU6.1|CAS1_RICCO	RecName: Full=Cycloartenol synthase; Short=RcCAS.	759	86.96	1412	0	AT2G07050.1	cycloartenol synthase 1	754	81.7	1333	0	sp|Q2XPU6|CAS1_RICCO	Cycloartenol synthase [Ricinus]	759	86.96	1412	0
73	52	1	JT919744.1_c2	96	68017	2	0.11	614	67659.5	6.88	gi|255564966|ref|XP_002523476.1|	ligatin, putative [Ricinus communis].	617	84.44	1068	0	AT1G71350.1	eukaryotic translation initiation factor SUI1 family protein	615	66.83	827	0	sp|Q5PPG7|EIF2D_RAT	Eukaryotic translation initiation factor 2D [Rattus norvegicus]	623	31.46	256	7e-75
74	53	1	JT938614.1_2	95	23702	2	0.35	209	23374.5	5.43	gi|224093425|ref|XP_002309918.1|	predicted protein [Populus trichocarpa].	209	93.3	405	1e-141	AT1G43890.3	RAB GTPASE HOMOLOG B18	200	88	366	5e-129	sp|O23657|RABC1_ARATH	Ras-related protein RABC1 [Arabidopsis thaliana]	200	88	366	6e-128
75	54	1	JT946100.1_c2	93	21378	1	0.18	187	21391.4	10.29	gi|255574399|ref|XP_002528113.1|	conserved hypothetical protein [Ricinus communis].	187	72.19	244	8e-78	AT3G51890.1	Clathrin light chain protein	153	71.9	208	1e-66	sp|F4J5M9|CLC3_ARATH	Clathrin light chain 3 [Arabidopsis thaliana]	153	71.9	208	1e-65
76	55	1	JT935611.1_2	91	34585	4	0.51	329	34492.8	9.59	gi|462397211|gb|EMJ03010.1|	hypothetical protein PRUPE_ppa008401mg [Prunus persica].	329	84.8	574	0	AT4G13010.1	Oxidoreductase, zinc-binding dehydrogenase family protein	329	81.76	545	0	sp|Q9SV68|QORH_ARATH	Putative quinone-oxidoreductase homolog, chloroplastic [Arabidopsis thaliana]	329	81.76	545	0
77	56	1	JT954184.1_2	87	16340	1	0.24	150	16292.6	11.16	gi|255557317|ref|XP_002519689.1|	40S ribosomal protein S14, putative [Ricinus communis].	150	98.67	302	6e-103	AT3G52580.1	Ribosomal protein S11 family protein	139	93.53	271	9e-94	sp|P42036|RS143_ARATH	40S ribosomal protein S14-3 [Arabidopsis thaliana]	139	93.53	271	1e-92
78	57	1	JT924463.1_3	81	58144	1	0.06	527	57780.9	6.95	gi|225449659|ref|XP_002263319.1|	PREDICTED: pyruvate kinase, cytosolic isozyme-like [Vitis	527	88.24	986	0	AT3G52990.1	Pyruvate kinase family protein	527	84.63	951	0	sp|Q42806|KPYC_SOYBN	Pyruvate kinase, cytosolic isozyme [Glycine]	496	43.95	399	1e-131
79	58	1	JT928738.1_1	81	37240	2	0.21	339	37149.3	7.77	gi|255540341|ref|XP_002511235.1|	glyceraldehyde 3-phosphate dehydrogenase, putative [Ricinus	339	92.04	647	0	AT3G04120.1	glyceraldehyde-3-phosphate dehydrogenase C subunit 1	334	88.62	621	0	sp|P25861|G3PC_ANTMA	Glyceraldehyde-3-phosphate dehydrogenase, cytosolic [Antirrhinum majus]	333	91.89	633	0
80	59	1	JT946910.1_c1	80	34977	1	0.11	316	33972.9	7.61	gi|224080749|ref|XP_002306220.1|	predicted protein [Populus trichocarpa].	301	85.38	530	0	AT3G12500.1	basic chitinase	300	73	456	1e-160	sp|P06215|CHIT_PHAVU	Endochitinase [Phaseolus]	322	73.91	506	1e-179
81	60	1	JT918758.1_c3	79	39707	1	0.09	352	39219	6.37	gi|170676820|gb|ACB30545.1|	long-chain acyl-CoA synthetase 4 [Ricinus communis].	350	89.43	660	0	AT4G23850.1	AMP-dependent synthetase and ligase family protein	350	77.14	585	0	sp|Q9T0A0|LACS4_ARATH	Long chain acyl-CoA synthetase 4 [Arabidopsis thaliana]	350	77.14	585	0
82	61	1	JT932779.1_c1	75	41021	1	0.09	367	40932.6	4.72	gi|356548123|ref|XP_003542453.1|	PREDICTED: 26S proteasome regulatory subunit 4 homolog A-like	367	99.46	736	0	AT4G29040.1	regulatory particle AAA-ATPase 2A	367	97.55	726	0	sp|Q9SZD4|PRS4A_ARATH	26S proteasome regulatory subunit 4 homolog A [Arabidopsis thaliana]	367	97.55	726	0
83	62	1	JT914648.1_c1	73	174610	1	0.02	1516	173007	8.42	gi|255550191|ref|XP_002516146.1|	myosin XI, putative [Ricinus communis].	1515	89.5	2803	0	AT4G33200.1	myosin, putative	1513	76.47	2383	0	sp|P54697|MYOJ_DICDI	Myosin-J heavy chain [Dictyostelium discoideum]	1161	39.79	759	0
84	63	1	JT925528.1_1	70	57791	1	0.06	527	57370.7	7.04	gi|224069760|ref|XP_002326407.1|	predicted protein [Populus trichocarpa].	527	94.31	1027	0	AT3G52990.1	Pyruvate kinase family protein	527	91.08	1002	0	sp|Q42806|KPYC_SOYBN	Pyruvate kinase, cytosolic isozyme [Glycine]	495	44.24	394	2e-129
85	64	1	JT939513.1_1	69	13177	1	0.3	117	13070.7	10.42	gi|255577267|ref|XP_002529515.1|	hypothetical protein RCOM_1715180 [Ricinus communis].	103	67.96	132	2e-37	AT1G53670.2	methionine sulfoxide reductase B 1	91	51.65	84.3	1e-20	sp|Q9C8M2|MSRB1_ARATH	Peptide methionine sulfoxide reductase B1, chloroplastic [Arabidopsis thaliana]	91	51.65	84.3	2e-19
86	65	1	JT918818.1_2	66	94855	2	0.08	868	94627.1	9.45	gi|225465253|ref|XP_002268311.1|	PREDICTED: dynamin-2B [Vitis vinifera].	871	84.85	1482	0	AT1G59610.1	dynamin-like 3	875	81.14	1375	0	sp|Q9LQ55|DRP2B_ARATH	Dynamin-2B [Arabidopsis thaliana]	875	81.14	1375	0
87	66	1	JT922608.1_2	66	54393	1	0.07	476	53800.2	7.89	gi|224121616|ref|XP_002330745.1|	predicted protein [Populus trichocarpa].	472	85.59	838	0	AT1G16570.1	UDP-Glycosyltransferase superfamily protein	470	71.28	665	0	sp|Q921Q3|ALG1_MOUSE	Chitobiosyldiphosphodolichol beta-mannosyltransferase [Mus musculus]	478	42.89	352	1e-114
88	67	1	JT962900.1_c2	65	10313	3	1.68	92	10319.6	6.87	gi|330318654|gb|AEC10987.1|	acyl-CoA-binding protein [Camellia sinensis].	90	90	172	1e-53	AT1G31812.1	acyl-CoA-binding protein 6	91	75.82	142	2e-44	sp|O04066|ACBP_RICCO	Acyl-CoA-binding protein [Ricinus]	90	91.11	171	1e-54
89	68	1	JT922578.1_1	63	69198	2	0.11	614	68955	7.65	gi|255571115|ref|XP_002526508.1|	dynamin, putative [Ricinus communis].	618	95.15	1193	0	AT3G60190.1	DYNAMIN-like 1E	624	83.65	1106	0	sp|Q9FNX5|DRP1E_ARATH	Dynamin-related protein 1E [Arabidopsis thaliana]	624	83.65	1106	0
90	68	2	JT919755.1_c2	52	35841	2	0.22	312	35748.4	9.8	gi|359489239|ref|XP_002265553.2|	PREDICTED: dynamin-related protein 1E isoform 2 [Vitis vinifera].	262	90.08	492	2e-168	AT3G60190.1	DYNAMIN-like 1E	265	76.6	434	3e-148	sp|Q9FNX5|DRP1E_ARATH	Dynamin-related protein 1E [Arabidopsis thaliana]	265	76.6	434	4e-147
91	69	1	JT929990.1_c1	61	46784	2	0.17	413	46299.8	8.14	gi|224128201|ref|XP_002329106.1|	predicted protein [Populus trichocarpa].	419	81.86	711	0	AT1G52920.1	G protein coupled receptor	413	71.19	614	0	sp|Q9JJK2|LANC2_MOUSE	LanC-like protein 2 [Mus musculus]	442	39.14	282	1e-88
92	70	1	JT932528.1_c1	59	36099	1	0.1	326	36007.7	10.08	gi|255584329|ref|XP_002532900.1|	conserved hypothetical protein [Ricinus communis].	326	85.58	586	0	AT5G39410.1	Saccharopine dehydrogenase	321	70.09	464	6e-162	sp|Q8LGI2|SCPDL_ARATH	Probable mitochondrial saccharopine dehydrogenase-like oxidoreductase At5g39410 [Arabidopsis thaliana]	321	70.09	464	8e-161
93	71	1	JT931129.1_3	57	49697	3	0.24	449	49385.8	9.66	gi|6015058|sp|O49169.1|EF1A_MANES	RecName: Full=Elongation factor 1-alpha; Short=EF-1-alpha.	449	99.11	917	0	AT5G60390.3	GTP binding Elongation factor Tu family protein	449	95.32	888	0	sp|O49169|EF1A_MANES	Elongation factor 1-alpha [Manihot esculenta]	449	99.11	917	0
94	72	1	JT948536.1_c2	55	22740	1	0.17	199	22525.4	7.95	gi|47681462|gb|AAT37501.1|	putative SNARE protein [Hevea brasiliensis].	199	99.5	414	1e-145	AT5G58060.1	SNARE-like superfamily protein	199	87.94	372	8e-132	sp|Q9ZRD6|YKT61_ARATH	VAMP-like protein YKT61 [Arabidopsis thaliana]	199	87.94	372	1e-130
95	73	1	JT918804.1_c1	54	82832	1	0.04	756	82084.7	5.14	gi|255540511|ref|XP_002511320.1|	zinc ion binding protein, putative [Ricinus communis].	763	65.14	879	0	AT4G24690.1	ubiquitin-associated (UBA)/TS-N domain-containing protein / octicosapeptide/Phox/Bemp1 (PB1) domain-containing protein	778	43.83	551	0	sp|Q5BL31|CF106_DANRE	Uncharacterized protein C6orf106 homolog [Danio rerio]	154	29.22	86.7	3e-17
96	74	1	JT930507.1_c1	53	54507	1	0.07	490	54027.6	5.36	gi|255567389|ref|XP_002524674.1|	Sphingosine kinase, putative [Ricinus communis].	486	83.54	846	0	AT4G21540.1	sphingosine kinase 1	480	65.62	657	0	sp|Q9NYA1|SPHK1_HUMAN	Sphingosine kinase 1 [Homo sapiens]	356	32.02	171	1e-46
97	75	1	JT914456.1_c2	52	194165	1	0.02	1705	193146	5.08	gi|255574808|ref|XP_002528311.1|	clathrin heavy chain, putative [Ricinus communis].	1657	97.77	3337	0	AT3G11130.1	Clathrin, heavy chain	1657	93.9	3253	0	sp|Q0WNJ6|CLAH1_ARATH	Clathrin heavy chain 1 [Arabidopsis thaliana]	1657	93.9	3253	0
98	76	1	JT941244.1_c3	51	21863	1	0.18	193	21763.2	8.66	gi|255557975|ref|XP_002520016.1|	ADP-ribosylation factor, arf, putative [Ricinus communis].	193	97.93	396	1e-138	AT5G17060.1	ADP-ribosylation factor B1B	191	91.1	370	5e-131	sp|P91924|ARF_DUGJA	ADP-ribosylation factor [Dugesia]	178	62.36	251	2e-83
99	77	1	JT921291.1_1	49	68488	1	0.05	610	68187.5	7.9	gi|255537813|ref|XP_002509973.1|	dynamin, putative [Ricinus communis].	610	96.72	1222	0	AT5G42080.1	dynamin-like protein	610	88.69	1142	0	sp|Q39828|SDL5A_SOYBN	Dynamin-related protein 5A [Glycine]	610	90.82	1163	0
100	78	1	JT918921.1_c1	49	81080	1	0.05	733	80332.1	8.57	gi|255582880|ref|XP_002532212.1|	long-chain-fatty-acid CoA ligase, putative [Ricinus communis].	736	83.15	1270	0	AT2G04350.2	AMP-dependent synthetase and ligase family protein	679	74.96	1080	0	sp|Q9SJD4|LACS8_ARATH	Long chain acyl-CoA synthetase 8 [Arabidopsis thaliana]	679	74.96	1080	0
101	79	1	JT948689.1_c1	49	20987	1	0.18	187	20942.6	11.85	gi|255564218|ref|XP_002523106.1|	60S ribosomal protein L18, putative [Ricinus communis].	187	96.26	367	2e-127	AT3G05590.1	ribosomal protein L18	187	86.63	336	4e-118	sp|P42791|RL182_ARATH	60S ribosomal protein L18-2 [Arabidopsis thaliana]	187	86.63	336	6e-117
102	80	1	JT940960.1_c3	49	20094	1	0.19	175	19935.6	4.61	gi|379048253|gb|AFC88294.1|	calcineurin-like protein [Hevea brasiliensis].	175	98.86	354	1e-122	AT3G18430.2	Calcium-binding EF-hand family protein	175	84	302	8e-105	sp|P42322|CANB1_NAEGR	Calcineurin subunit B [Naegleria gruberi]	168	38.69	124	3e-34
103	81	1	JT928471.1_c3	46	58054	1	0.06	514	57634.1	9.59	gi|224090935|ref|XP_002309122.1|	predicted protein, partial [Populus trichocarpa].	433	90.76	825	0	AT5G01220.1	sulfoquinovosyldiacylglycerol 2	486	75.51	749	0	sp|Q8NT41|MGTA_CORGL	GDP-mannose-dependent alpha-mannosyltransferase [Corynebacterium glutamicum (strain ATCC 13032 / DSM 20300 / JCM 1318 / LMG 3730 / NCIMB 10025)]	377	32.1	165	5e-44
104	82	1	JT955224.1_3	46	18218	1	0.21	159	17944.5	4.59	gi|224101877|ref|XP_002312456.1|	predicted protein [Populus trichocarpa].	159	93.08	314	2e-107	AT1G23260.1	MMS ZWEI homologue 1	159	80.5	273	3e-94	sp|Q93YP0|UEV1A_ARATH	Ubiquitin-conjugating enzyme E2 variant 1A [Arabidopsis thaliana]	159	80.5	273	4e-93
105	83	1	JT963368.1_c1	44	17523	1	0.22	157	17533.5	5.21	gi|224142681|ref|XP_002324683.1|	predicted protein [Populus trichocarpa].	158	67.09	203	6e-64	AT1G07400.1	HSP20-like chaperones superfamily protein	162	41.36	114	8e-32	sp|P05478|HSP16_SOYBN	18.5 kDa class I heat shock protein [Glycine max]	144	47.92	133	4e-38
106	84	1	JT938754.1_3	43	35322	3	0.36	322	35115.6	9.08	gi|255566744|ref|XP_002524356.1|	short-chain dehydrogenase, putative [Ricinus communis].	322	84.47	575	0	AT4G09750.1	NAD(P)-binding Rossmann-fold superfamily protein	321	80.69	558	0	sp|A6QP05|DHR12_BOVIN	Dehydrogenase/reductase SDR family member 12 [Bos taurus]	299	46.82	262	1e-83
107	85	1	JT922944.1_c2	43	61576	1	0.06	554	61271.5	6.8	gi|211906504|gb|ACJ11745.1|	heat shock protein 70 [Gossypium hirsutum].	545	96.88	1087	0	AT3G12580.1	heat shock protein 70	542	94.46	1065	0	sp|P09189|HSP7C_PETHY	Heat shock cognate 70 kDa protein [Petunia hybrida]	545	95.23	1070	0
108	86	1	JT944943.1_3	43	24986	2	0.33	225	24830.2	8.45	gi|462401488|gb|EMJ07045.1|	hypothetical protein PRUPE_ppa011070mg [Prunus persica].	225	91.11	432	8e-152	AT5G65270.1	RAB GTPase homolog A4A	224	86.61	406	2e-144	sp|Q40522|RB11D_TOBAC	Ras-related protein Rab11D [Nicotiana tabacum]	224	88.84	414	3e-146
109	87	1	JT955813.1_3	42	13914	1	0.28	124	13809	10.34	gi|255539715|ref|XP_002510922.1|	40S ribosomal protein S20, putative [Ricinus communis].	124	97.58	248	2e-82	AT5G62300.2	Ribosomal protein S10p/S20e family protein	124	91.94	231	9e-79	sp|P49200|RS201_ARATH	40S ribosomal protein S20-1 [Arabidopsis thaliana]	124	91.94	231	1e-77
110	88	1	JT956472.1_2	42	18436	1	0.21	162	18447.7	6.3	gi|255579096|ref|XP_002530396.1|	heat-shock protein, putative [Ricinus communis].	162	90.12	285	8e-96	AT1G53540.1	HSP20-like chaperones superfamily protein	162	71.6	236	3e-79	sp|P05478|HSP16_SOYBN	18.5 kDa class I heat shock protein [Glycine max]	162	80.86	267	1e-90
111	89	1	JT929066.1_3	41	50535	1	0.07	438	50395.7	6.88	gi|255555963|ref|XP_002519016.1|	Polyphenol oxidase, chloroplast precursor, putative [Ricinus	441	80.05	685	0	AT1G16400.1	cytochrome P450, family 79, subfamily F, polypeptide 2	105	26.67	32.3	0.66	sp|P43309|PPO_MALDO	Polyphenol oxidase, chloroplastic [Malus]	439	69.93	641	0
112	90	1	JT952515.1_2	40	17266	2	0.5	153	17219.7	7.51	gi|225461646|ref|XP_002285421.1|	PREDICTED: ubiquitin-conjugating enzyme E2 35 isoform 1 [Vitis	153	100	315	6e-108	AT1G78870.2	ubiquitin-conjugating enzyme 35	153	98.69	312	1e-109	sp|Q94A97|UBC35_ARATH	Ubiquitin-conjugating enzyme E2 35 [Arabidopsis thaliana]	153	98.69	312	1e-108
113	91	1	JT948404.1_1	38	26624	1	0.14	229	26639.2	10.34	gi|224110146|ref|XP_002315427.1|	predicted protein [Populus trichocarpa].	230	78.26	315	2e-105	AT3G52220.1	-	224	64.29	273	1e-91	sp|Q99LX5|MMTA2_MOUSE	Multiple myeloma tumor-associated protein 2 homolog [Mus musculus]	110	47.27	108	9e-27
114	92	1	JT938456.1_2	37	34750	1	0.11	324	34714.8	7.16	gi|296087606|emb|CBI34862.3|	unnamed protein product, partial [Vitis vinifera].	267	75.66	370	6e-125	AT5G40490.1	RNA-binding (RRM/RBD/RNP motifs) family protein	200	78.5	322	1e-106	sp|Q8W034|RNP1_ARATH	Heterogeneous nuclear ribonucleoprotein 1 [Arabidopsis thaliana]	187	44.39	174	9e-49
115	93	1	JT925995.1_2	37	46431	1	0.08	417	45946	4.79	gi|305387431|gb|ADM52185.1|	type II metacaspase [Hevea brasiliensis].	417	100	853	0	AT1G79340.1	metacaspase 4	425	66.82	578	0	sp|O64517|MCA4_ARATH	Metacaspase-4 [Arabidopsis thaliana]	425	66.82	578	0
116	94	1	JT919498.1_c3	36	74559	1	0.05	649	74318.7	7.61	gi|255575774|ref|XP_002528786.1|	Zuotin, putative [Ricinus communis].	649	86.9	1041	0	AT3G11450.1	DnaJ domain ;Myb-like DNA-binding domain	649	67.64	781	0	sp|Q1RMH9|DNJC2_BOVIN	DnaJ homolog subfamily C member 2 [Bos taurus]	589	37.01	299	4e-90
117	95	1	JT948023.1_3	36	22683	1	0.17	203	22640.6	7.36	gi|297844728|ref|XP_002890245.1|	SNF7 family protein [Arabidopsis lyrata subsp. lyrata].	203	90.15	380	5e-132	AT1G17730.1	vacuolar protein sorting 46.1	203	89.66	379	3e-134	sp|O96552|CHMP1_DICDI	Charged multivesicular body protein 1 [Dictyostelium discoideum]	194	48.45	194	1e-60
118	96	1	JT916383.1_c1	36	95794	1	0.04	859	94997.4	7.04	gi|224089078|ref|XP_002308627.1|	predicted protein [Populus trichocarpa].	859	89.76	1608	0	AT2G25730.2	-	860	74.88	1348	0	sp|Q551A3|Y6689_DICDI	Protein DDB_G0276689 [Dictyostelium discoideum]	789	23.57	156	2e-37
119	97	1	JT934165.1_3	34	33950	1	0.11	315	33856.6	3.89	gi|255558734|ref|XP_002520391.1|	conserved hypothetical protein [Ricinus communis].	311	43.09	142	3e-36	AT1G76780.1	HSP20-like chaperones superfamily protein	85	32.94	29.3	4.8
120	98	1	JT944400.1_c2	34	18544	1	0.21	167	18270	7.25	gi|255585404|ref|XP_002533397.1|	ARF GTPase activator, putative [Ricinus communis].	167	92.81	316	6e-108	AT5G47710.2	Calcium-dependent lipid-binding (CaLB domain) family protein	162	77.78	270	1e-92	sp|Q8LFN9|AGD13_ARATH	Probable ADP-ribosylation factor GTPase-activating protein AGD13 [Arabidopsis thaliana]	159	45.28	135	8e-37
121	99	1	JT949571.1_3	32	17703	1	0.22	159	17485.6	5.87	gi|33325131|gb|AAQ08198.1|	eukaryotic translation initiation factor 5A isoform VIII, partial	158	100	327	2e-112	AT1G13950.1	eukaryotic elongation factor 5A-1	159	87.42	287	1e-99	sp|Q9AXJ4|IF5A_MANES	Eukaryotic translation initiation factor 5A [Manihot]	159	94.34	316	8e-110
122	100	1	JT916142.1_1	28	64578	1	0.06	586	62850.1	7.8	gi|255548920|ref|XP_002515516.1|	grr1, plant, putative [Ricinus communis].	576	83.33	972	0	AT2G25490.1	EIN3-binding F box protein 1	576	59.72	684	0	sp|Q9SKK0|EBF1_ARATH	EIN3-binding F-box protein 1 [Arabidopsis thaliana]	576	59.72	684	0
123	101	1	JT955341.1_1	27	12776	1	0.31	113	12669.4	9.2	gi|317159559|gb|ADV04054.1|	eukaryotic translation initiation factor 3 [Hevea brasiliensis].	113	100	233	6e-77	AT4G27130.1	Translation initiation factor SUI1 family protein	113	88.5	214	2e-72	sp|P41568|SUI11_ARATH	Protein translation factor SUI1 homolog 1 [Arabidopsis thaliana]	113	88.5	214	3e-71
124	102	1	JT915583.1_c1	26	130208	1	0.03	1158	129317	4.6	gi|255573523|ref|XP_002527686.1|	ATP binding protein, putative [Ricinus communis].	1102	86.57	1900	0	AT1G73460.1	Protein kinase superfamily protein	1201	63.11	1406	0	sp|Q9NR20|DYRK4_HUMAN	Dual specificity tyrosine-phosphorylation-regulated kinase 4 [Homo sapiens]	328	38.41	222	6e-61
125	103	1	JT917100.1_3	26	101754	1	0.04	892	100677	7.59	gi|255563673|ref|XP_002522838.1|	pentatricopeptide repeat-containing protein, putative [Ricinus	865	67.05	1120	0	AT4G04790.1	Tetratricopeptide repeat (TPR)-like superfamily protein	772	47.67	700	0	sp|Q6NQ81|PP304_ARATH	Pentatricopeptide repeat-containing protein At4g04790, mitochondrial [Arabidopsis thaliana]	772	47.67	700	0
126	104	1	JT944359.1_c1	24	15125	1	0.26	132	15020.3	7.5	gi|462419779|gb|EMJ24042.1|	hypothetical protein PRUPE_ppa006689mg [Prunus persica].	132	88.64	251	1e-79	AT1G80950.1	Phospholipid/glycerol acyltransferase family protein	132	72.73	216	4e-69	sp|Q3TFD2|PCAT1_MOUSE	Lysophosphatidylcholine acyltransferase 1 [Mus musculus]	127	43.31	104	1e-25
127	105	1	JT919502.1_1	23	68515	1	0.05	625	68214.6	6.96	gi|300834857|gb|ADK37758.1|	delta 1-pyrroline-5-carboxylate synthetase [Jatropha curcas].	622	89.71	1097	0	AT3G55610.2	delta 1-pyrroline-5-carboxylate synthase 2	619	78.35	975	0	sp|O04015|P5CS_ACTDE	Delta-1-pyrroline-5-carboxylate synthase [Actinidia]	620	83.87	1023	0
128	106	1	JT929875.1_c2	22	27557	1	0.14	247	27346.7	7.96	gi|255580256|ref|XP_002530958.1|	multidrug resistance pump, putative [Ricinus communis].	220	77.27	357	5e-118	AT3G03620.1	MATE efflux family protein	237	49.79	240	3e-75	sp|Q9LYT3|TT12_ARATH	Protein TRANSPARENT TESTA 12 [Arabidopsis thaliana]	226	41.15	180	2e-51
129	107	1	JT938924.1_c3	22	37397	1	0.1	337	37135.5	8.2	gi|255538356|ref|XP_002510243.1|	dihydroflavonal-4-reductase, putative [Ricinus communis].	337	81.9	583	0	AT4G33360.1	NAD(P)-binding Rossmann-fold superfamily protein	337	73.59	531	0	sp|P73212|DFRA_SYNY3	Putative dihydroflavonol-4-reductase [Synechocystis sp. (strain PCC 6803 / Kazusa)]	341	30.79	152	2e-41
130	108	1	JT932200.1_3	22	51908	1	0.07	468	51825.5	10.93	gi|255539521|ref|XP_002510825.1|	conserved hypothetical protein [Ricinus communis].	478	76.57	626	0	AT5G62070.1	IQ-domain 23	441	47.17	220	7e-66	sp|Q8LPG9|IQD14_ARATH	Protein IQ-DOMAIN 14 [Arabidopsis thaliana]	66	50	73.2	2e-12
131	109	1	JT916366.1_c1	21	83221	1	0.04	722	81734.6	6.56	gi|224140235|ref|XP_002323489.1|	predicted protein [Populus trichocarpa].	722	74.52	1152	0	AT5G03800.1	Pentatricopeptide repeat (PPR) superfamily protein	726	58.4	918	0	sp|Q9FFN1|PP363_ARATH	Pentatricopeptide repeat-containing protein At5g03800 [Arabidopsis thaliana]	726	58.4	918	0
132	110	1	JT953757.1_1	18	4279	1	1.04	36	4282.09	10.45	-	-	-	-	-	-
133	111	1	JT938759.1_c1	15	42153	1	0.09	361	41436.9	7.84	gi|255553681|ref|XP_002517881.1|	ring finger protein, putative [Ricinus communis].	377	75.33	518	0	AT5G44280.1	RING 1A	374	55.08	367	3e-122	sp|Q9FKW0|RNG1A_ARATH	Putative E3 ubiquitin-protein ligase RING1a [Arabidopsis thaliana]	374	55.08	367	4e-121
134	112	1	JT928603.1_c2	15	47995	1	0.08	427	47910.1	10.36	gi|255586323|ref|XP_002533812.1|	conserved hypothetical protein [Ricinus communis].	427	70.49	589	0	AT1G53800.1	-	440	52.05	382	2e-126
135	113	1	JT936368.1_c3	15	38432	1	0.1	345	38398.1	5.53	gi|255568948|ref|XP_002525444.1|	conserved hypothetical protein [Ricinus communis].	345	84.35	613	0	AT5G18230.1	transcription regulator NOT2/NOT3/NOT5 family protein	348	62.36	392	6e-129	sp|O75175|CNOT3_HUMAN	CCR4-NOT transcription complex subunit 3 [Homo sapiens]	206	47.09	172	1e-46
136	114	1	JT925987.1_2	15	65234	1	0.06	582	65160.1	5.37	gi|224093862|ref|XP_002310024.1|	predicted protein [Populus trichocarpa].	585	80.51	964	0	AT5G64860.1	disproportionating enzyme	537	75.79	874	0	sp|Q06801|DPEP_SOLTU	4-alpha-glucanotransferase, chloroplastic/amyloplastic [Solanum tuberosum]	585	71.62	883	0
137	115	1	JT978247.1_c1	14	3420	1	1.36	29	3307.98	9.3	-	-	-	-	-	-

## Sheet: NR
Supplemental Table X
								Primary Structure Information			BLASTP search against NR database						BLASTP search against TAIR10-pep database						BLASTP search against Swiss-Prot database						SOSUI			TMHMM
Entry No.	Family	Member	Accession	Score	Mass	Sequences	emPAI	Length	M.W. [Da]	pI	Beat Hit IDs	Best Hit Definition	Alignment Length	Identity	Bit Score	E-value	Beat Hit IDs	Best Hit Definition	Alignment Length	Identity	Bit Score	E-value	Beat Hit IDs	Best Hit Definition	Alignment Length	Identity	Bit Score	E-value	Protein Type	No. of Helix	Region of Helix	No. of Helix
1	1	1	JT948852.1_c2	5669	21625	7	4.1	203	21637.7	4.82	gi|37901161|gb|AAP46159.1|	REF-like stress related protein 1 [Hevea brasiliensis].	99	52.53	103	2e-24	AT3G05500.1	Rubber elongation factor protein (REF)	110	40	90.9	8e-22	sp|Q9SW70|SRP_VITRI	Stress-related protein [Vitis riparia]	94	47.87	97.8	4e-23	SOLUBLE	NONE		PredHel=0
2	2	1	JT939480.1_c1	4652	26150	9	2.88	242	26108.6	7.35	gi|37901161|gb|AAP46159.1|	REF-like stress related protein 1 [Hevea brasiliensis].	174	54.6	169	8e-49	AT3G05500.1	Rubber elongation factor protein (REF)	120	54.17	105	1e-26	sp|P15252|REF_HEVBR	Rubber elongation factor protein [Hevea]	124	48.39	112	4e-29	MEMBRANE	1	REGION 117-139	PredHel=0
3	2	2	JT942555.1_c1	4567	23621	9	3.46	222	23577.7	5.09	gi|37901161|gb|AAP46159.1|	REF-like stress related protein 1 [Hevea brasiliensis].	174	54.6	168	5e-49	AT3G05500.1	Rubber elongation factor protein (REF)	120	54.17	105	6e-27	sp|P15252|REF_HEVBR	Rubber elongation factor protein [Hevea]	124	48.39	111	3e-29	MEMBRANE	1	REGION 97-119	PredHel=0
4	3	1	JT951018.1_2	2640	14713	8	5.55	138	14721.6	4.79	gi|132270|sp|P15252.2|REF_HEVBR	RecName: Full=Rubber elongation factor protein; Short=REF; AltName:	138	100	277	2e-93	AT3G05500.1	Rubber elongation factor protein (REF)	118	48.31	100	4e-26	sp|P15252|REF_HEVBR	Rubber elongation factor protein [Hevea]	138	100	277	5e-95	SOLUBLE	NONE		PredHel=0
6	5	1	JT945746.1_2	2238	29535	15	11.59	257	29383.2	8.69	gi|255556087|ref|XP_002519078.1|	conserved hypothetical protein [Ricinus communis].	231	65.37	319	2e-106	AT1G11755.1	Undecaprenyl pyrophosphate synthetase family protein	234	50.85	251	2e-82	sp|Q96E22|NGBR_HUMAN	Nogo-B receptor [Homo sapiens]	197	23.86	72	2e-13	SOLUBLE	NONE		PredHel=0
10	8	1	JT949604.1_3	1093	22331	9	3.15	204	22344.4	4.53	gi|14423933|sp|O82803.1|SRPP_HEVBR	RecName: Full=Small rubber particle protein; Short=SRPP; AltName:	204	100	403	6e-141	AT3G05500.1	Rubber elongation factor protein (REF)	218	53.67	207	2e-66	sp|O82803|SRPP_HEVBR	Small rubber particle protein [Hevea brasiliensis]	204	100	403	1e-142	SOLUBLE	NONE		PredHel=0
22	12	1	JT957715.1_2	482	17567	8	3.93	154	17463.9	4.7	gi|37901161|gb|AAP46159.1|	REF-like stress related protein 1 [Hevea brasiliensis].	178	53.93	173	5e-52	AT3G05500.1	Rubber elongation factor protein (REF)	110	56.36	105	1e-27	sp|O82803|SRPP_HEVBR	Small rubber particle protein [Hevea brasiliensis]	105	56.19	115	6e-31	MEMBRANE	1	REGION 32-54	PredHel=0
26	15	1	JT948343.1_1	399	19613	7	2.5	175	19624.9	4.86	gi|38122474|gb|AAR11448.1|	rubber elongation factor [Hevea brasiliensis].	175	99.43	347	4e-120	AT3G05500.1	Rubber elongation factor protein (REF)	111	55.86	105	2e-27	sp|P15252|REF_HEVBR	Rubber elongation factor protein [Hevea]	133	54.14	139	3e-40	SOLUBLE	NONE		PredHel=0
34	20	1	JT937325.1_3	296	33119	6	0.91	284	32797.8	8.11	gi|16751461|dbj|BAB71777.1|	cis-prenyltransferase [Hevea brasiliensis].	284	97.54	577	0	AT2G17570.1	Undecaprenyl pyrophosphate synthetase family protein	271	56.83	316	7e-107	sp|Q8W3U4|HRT2_HEVBR	Rubber cis-polyprenyltransferase HRT2 [Hevea brasiliensis]	284	97.54	574	0	SOLUBLE	NONE		PredHel=0
40	26	1	JT946133.1_c3	213	24347	4	0.79	216	24019.8	4.27	gi|255542728|ref|XP_002512427.1|	Rubber elongation factor protein, putative [Ricinus communis].	231	50.65	204	4e-62	AT3G05500.1	Rubber elongation factor protein (REF)	217	43.78	161	3e-48	sp|O82803|SRPP_HEVBR	Small rubber particle protein [Hevea brasiliensis]	205	49.76	182	1e-55	SOLUBLE	NONE		PredHel=0
41	27	1	JT939205.1_c1	211	27055	6	1.2	243	26957.6	6.8	gi|255542728|ref|XP_002512427.1|	Rubber elongation factor protein, putative [Ricinus communis].	240	84.58	413	9e-144	AT3G05500.1	Rubber elongation factor protein (REF)	227	69.16	318	6e-109	sp|Q9MA63|Y3550_ARATH	REF/SRPP-like protein At3g05500 [Arabidopsis thaliana]	227	69.16	318	9e-108	SOLUBLE	NONE		PredHel=0
59	38	1	JT942264.1_c1	133	25638	3	0.51	230	25540.2	9.43	gi|255547720|ref|XP_002514917.1|	Small rubber particle protein, putative [Ricinus communis].	229	75.55	327	3e-110	AT1G67360.1	Rubber elongation factor protein (REF)	233	57.08	258	1e-85	sp|Q9FYF7|Y1736_ARATH	REF/SRPP-like protein At1g67360 [Arabidopsis thaliana]	233	57.08	258	1e-84	SOLUBLE	NONE		PredHel=0

## Sheet: 小胞輸送
Supplemental Table X
								Primary Structure Information			BLASTP search against NR database						BLASTP search against TAIR10-pep database						BLASTP search against Swiss-Prot database						SOSUI			TMHMM
Entry No.	Family	Member	Accession	Score	Mass	Sequences	emPAI	Length	M.W. [Da]	pI	Beat Hit IDs	Best Hit Definition	Alignment Length	Identity	Bit Score	E-value	Beat Hit IDs	Best Hit Definition	Alignment Length	Identity	Bit Score	E-value	Beat Hit IDs	Best Hit Definition	Alignment Length	Identity	Bit Score	E-value	Protein Type	No. of Helix	Region of Helix	No. of Helix
5	4	1	JT940643.1_c1	2301	41234	10	2.7	374	41202.3	9.03	gi|387778880|gb|AFJ97274.1|	beta-1,3-glucanase [Hevea brasiliensis].	374	99.73	765	0	AT4G16260.1	Glycosyl hydrolase superfamily protein	342	64.62	461	7e-162	sp|P52407|E13B_HEVBR	Glucan endo-1,3-beta-glucosidase, basic vacuolar isoform [Hevea brasiliensis]	374	95.99	712	0	SOLUBLE	NONE		PredHel=0
12	10	1	JT937869.1_c3	558	23973	7	1.81	216	23816.7	8.02	gi|871510|emb|CAA90080.1|	small GTP-binding protein [Pisum sativum].	216	92.13	419	8e-147	AT5G59840.1	Ras-related small GTP-binding family protein	206	95.15	404	9e-144	sp|P28186|RAE1C_ARATH	Ras-related protein RABE1c [Arabidopsis thaliana]	206	94.17	402	8e-142	SOLUBLE	NONE		PredHel=0
13	10	2	JT944521.1_c3	519	23958	7	1.81	216	23801.7	8.02	gi|327505553|gb|AEA92304.1|	Rab2 [Hevea brasiliensis].	216	100	445	3e-157	AT5G59840.1	Ras-related small GTP-binding family protein	206	96.12	408	3e-145	sp|P28186|RAE1C_ARATH	Ras-related protein RABE1c [Arabidopsis thaliana]	206	95.15	405	3e-143	SOLUBLE	NONE		PredHel=0
14	10	3	JT947009.1_3	517	24043	7	1.8	216	23886.8	8.44	gi|327505559|gb|AEA92307.1|	Rab3 [Hevea brasiliensis].	216	100	446	2e-157	AT5G59840.1	Ras-related small GTP-binding family protein	206	94.66	403	2e-143	sp|P28186|RAE1C_ARATH	Ras-related protein RABE1c [Arabidopsis thaliana]	206	93.69	401	1e-141	SOLUBLE	NONE		PredHel=0
15	10	4	JT946657.1_3	508	24056	7	1.8	216	23899.8	8.02	gi|302595187|gb|ADL59582.1|	Rab1 [Hevea brasiliensis].	216	99.54	444	1e-156	AT5G59840.1	Ras-related small GTP-binding family protein	206	95.63	406	1e-144	sp|P28186|RAE1C_ARATH	Ras-related protein RABE1c [Arabidopsis thaliana]	206	94.66	404	9e-143	SOLUBLE	NONE		PredHel=0
16	10	5	JT950598.1_c2	425	22771	5	1.54	202	22500.4	5.06	gi|327505561|gb|AEA92308.1|	Rab4 [Hevea brasiliensis].	202	100	418	4e-147	AT3G11730.1	Ras-related small GTP-binding family protein	204	86.27	362	8e-128	sp|Q9ZRE2|RABD1_ARATH	Ras-related protein RABD1 [Arabidopsis thaliana]	204	86.27	362	1e-126	SOLUBLE	NONE		PredHel=0
17	10	6	JT945059.1_c1	357	22833	6	1.53	203	22619.3	5.06	gi|390979747|gb|AFM30910.1|	small GTPase [Hevea brasiliensis].	203	100	425	1e-149	AT4G17530.1	RAB GTPase homolog 1C	203	91.63	390	9e-139	sp|Q05737|YPTM2_MAIZE	GTP-binding protein YPTM2 [Zea mays]	203	93.6	399	3e-141	SOLUBLE	NONE		PredHel=0
18	10	7	JT944033.1_c3	246	22796	4	0.86	203	22582.3	5.05	gi|224074217|ref|XP_002304305.1|	predicted protein [Populus trichocarpa].	203	94.58	405	4e-142	AT1G02130.1	RAS 5	203	89.66	392	2e-139	sp|P28188|RAD2A_ARATH	Ras-related protein RABD2a [Arabidopsis thaliana]	203	89.66	392	3e-138	SOLUBLE	NONE		PredHel=0
19	10	8	JT941172.1_c1	241	23201	6	1.91	208	23101.2	8.65	gi|460367695|ref|XP_004229706.1|	PREDICTED: ras-related protein RABH1b-like [Solanum lycopersicum].	208	96.15	414	2e-145	AT2G44610.1	Ras-related small GTP-binding family protein	208	93.27	403	2e-143	sp|O80501|RAH1B_ARATH	Ras-related protein RABH1b [Arabidopsis thaliana]	208	93.27	403	2e-142	SOLUBLE	NONE		PredHel=0
20	10	9	JT945574.1_2	113	23912	2	0.35	210	23584.8	6.04	gi|224062966|ref|XP_002300952.1|	predicted protein [Populus trichocarpa].	207	95.17	407	2e-142	AT1G43890.3	RAB GTPASE HOMOLOG B18	200	92	376	7e-133	sp|O23657|RABC1_ARATH	Ras-related protein RABC1 [Arabidopsis thaliana]	200	92	376	9e-132	SOLUBLE	NONE		PredHel=0
21	11	1	JT924151.1_c2	495	57374	12	1.57	503	57011.4	6.57	gi|255543106|ref|XP_002512616.1|	interferon-induced GTP-binding protein mx, putative [Ricinus	503	77.34	821	0	AT1G60500.1	Dynamin related protein 4C	501	56.49	589	0	sp|Q9ZP55|DRP4C_ARATH	Dynamin-related protein 4C [Arabidopsis thaliana]	501	56.49	589	0	SOLUBLE	NONE		PredHel=0
23	13	1	JT945402.1_1	434	22048	11	6.98	193	22005.2	7.65	gi|225437537|ref|XP_002275765.1|	PREDICTED: GTP-binding protein SAR1A [Vitis vinifera].	193	98.96	393	1e-137	AT4G02080.1	secretion-associated RAS super family 2	193	94.82	383	2e-136	sp|O04834|SAR1A_ARATH	GTP-binding protein SAR1A [Arabidopsis thaliana]	193	94.82	383	3e-135	SOLUBLE	NONE		PredHel=0
24	13	2	JT943935.1_c1	359	22140	8	3.94	193	22096.4	6.96	gi|255548481|ref|XP_002515297.1|	GTP-binding protein sar1, putative [Ricinus communis].	193	97.93	390	3e-136	AT4G02080.1	secretion-associated RAS super family 2	193	93.78	381	2e-135	sp|O04834|SAR1A_ARATH	GTP-binding protein SAR1A [Arabidopsis thaliana]	193	93.78	381	2e-134	SOLUBLE	NONE		PredHel=0
30	18	1	JT952583.1_c2	256	23563	6	1.46	211	23349.2	7.96	gi|255570175|ref|XP_002526048.1|	protein with unknown function [Ricinus communis].	210	97.62	430	2e-151	AT4G35860.1	GTP-binding 2	211	91.94	413	1e-147	sp|Q38922|RAB1B_ARATH	Ras-related protein RABB1b [Arabidopsis thaliana]	211	91.94	413	2e-146	SOLUBLE	NONE		PredHel=0
31	18	2	JT941238.1_3	192	10671	4	2.58	100	10506.7	5.69	gi|255568502|ref|XP_002525225.1|	protein with unknown function [Ricinus communis].	100	99	207	4e-66	AT4G17170.1	RAB GTPase homolog B1C	99	96.97	202	2e-66	sp|P92963|RAB1C_ARATH	Ras-related protein RABB1c [Arabidopsis thaliana]	99	96.97	202	2e-65	SOLUBLE	NONE		PredHel=0
32	19	1	JT943972.1_1	300	23324	9	3.56	206	22996.7	4.81	gi|224103431|ref|XP_002313053.1|	predicted protein [Populus trichocarpa].	206	98.54	424	3e-149	AT3G18820.1	RAB GTPase homolog G3F	206	93.2	404	4e-144	sp|P31022|RAB7_PEA	Ras-related protein Rab7 [Pisum]	206	95.15	412	4e-146	SOLUBLE	NONE		PredHel=0
33	19	2	JT944915.1_c2	260	23297	8	2.92	206	22969.7	4.69	gi|224103431|ref|XP_002313053.1|	predicted protein [Populus trichocarpa].	206	97.57	421	7e-148	AT3G18820.1	RAB GTPase homolog G3F	206	93.2	403	7e-144	sp|P31022|RAB7_PEA	Ras-related protein Rab7 [Pisum]	206	93.69	407	2e-144	SOLUBLE	NONE		PredHel=0
45	29	1	JT944240.1_c3	198	24305	5	1.07	218	24206	5.42	gi|255562484|ref|XP_002522248.1|	protein with unknown function [Ricinus communis].	218	99.54	445	5e-157	AT5G45750.1	RAB GTPase homolog A1C	218	87.16	394	1e-139	sp|Q9FK68|RAA1C_ARATH	Ras-related protein RABA1c [Arabidopsis thaliana]	218	87.16	394	2e-138	SOLUBLE	NONE		PredHel=0
46	29	2	JT948813.1_3	189	22056	5	1.22	201	21955.7	6.53	gi|224113085|ref|XP_002316386.1|	predicted protein [Populus trichocarpa].	199	93.47	393	5e-137	AT3G54840.1	Ras-related small GTP-binding family protein	202	88.61	368	3e-130	sp|Q9CB01|RABF1_ARATH	Ras-related protein RABF1 [Arabidopsis thaliana]	202	88.61	368	5e-129	SOLUBLE	NONE		PredHel=0
47	29	3	JT945020.1_1	177	18166	4	1.16	168	18063.3	7.51	gi|255577452|ref|XP_002529605.1|	protein with unknown function [Ricinus communis].	164	92.07	312	2e-105	AT3G54840.2	Ras-related small GTP-binding family protein	166	87.35	293	3e-101	sp|Q9CB01|RABF1_ARATH	Ras-related protein RABF1 [Arabidopsis thaliana]	166	87.35	293	8e-100	SOLUBLE	NONE		PredHel=0
48	29	4	JT945065.1_1	140	21871	3	0.62	200	21770.6	7.25	gi|449455421|ref|XP_004145451.1|	PREDICTED: ras-related protein RABF2b-like [Cucumis sativus].	200	94	391	2e-136	AT5G45130.1	RAB homolog 1	200	88	369	1e-130	sp|P31582|RAF2A_ARATH	Ras-related protein RABF2a [Arabidopsis thaliana]	200	88	369	2e-129	SOLUBLE	NONE		PredHel=0
49	29	5	JT950302.1_1	119	24028	4	0.8	215	23871.7	6.54	gi|255570960|ref|XP_002526431.1|	protein with unknown function [Ricinus communis].	215	96.28	429	8e-151	AT1G09630.1	RAB GTPase 11C	217	91.24	402	4e-143	sp|O04486|RAA2A_ARATH	Ras-related protein RABA2a [Arabidopsis thaliana]	217	91.24	402	5e-142	SOLUBLE	NONE		PredHel=0
60	39	1	JT933735.1_c1	128	25104	2	0.33	225	25005.1	6.95	gi|255544246|ref|XP_002513185.1|	protein with unknown function [Ricinus communis].	225	89.78	426	2e-149	AT5G47960.1	RAB GTPase homolog A4C	225	79.56	377	1e-132	sp|Q9FE79|RAA4C_ARATH	Ras-related protein RABA4c [Arabidopsis thaliana]	225	79.56	377	1e-131	SOLUBLE	NONE		PredHel=0
67	46	1	JT916348.1_c3	116	52650	4	0.32	460	52510.7	9.04	gi|255572477|ref|XP_002527173.1|	conserved hypothetical protein [Ricinus communis].	433	80.6	686	0	AT5G52580.1	RabGAP/TBC domain-containing protein	465	65.81	603	0	sp|Q8TC07|TBC15_HUMAN	TBC1 domain family member 15 [Homo sapiens]	142	49.3	150	5e-38	MEMBRANE	1	REGION 95-117	PredHel=1
74	53	1	JT938614.1_2	95	23702	2	0.35	209	23374.5	5.43	gi|224093425|ref|XP_002309918.1|	predicted protein [Populus trichocarpa].	209	93.3	405	1e-141	AT1G43890.3	RAB GTPASE HOMOLOG B18	200	88	366	5e-129	sp|O23657|RABC1_ARATH	Ras-related protein RABC1 [Arabidopsis thaliana]	200	88	366	6e-128	SOLUBLE	NONE		PredHel=0
75	54	1	JT946100.1_c2	93	21378	1	0.18	187	21391.4	10.29	gi|255574399|ref|XP_002528113.1|	conserved hypothetical protein [Ricinus communis].	187	72.19	244	8e-78	AT3G51890.1	Clathrin light chain protein	153	71.9	208	1e-66	sp|F4J5M9|CLC3_ARATH	Clathrin light chain 3 [Arabidopsis thaliana]	153	71.9	208	1e-65	SOLUBLE	NONE		PredHel=0
86	65	1	JT918818.1_2	66	94855	2	0.08	868	94627.1	9.45	gi|225465253|ref|XP_002268311.1|	PREDICTED: dynamin-2B [Vitis vinifera].	871	84.85	1482	0	AT1G59610.1	dynamin-like 3	875	81.14	1375	0	sp|Q9LQ55|DRP2B_ARATH	Dynamin-2B [Arabidopsis thaliana]	875	81.14	1375	0	SOLUBLE	NONE		PredHel=0
89	68	1	JT922578.1_1	63	69198	2	0.11	614	68955	7.65	gi|255571115|ref|XP_002526508.1|	dynamin, putative [Ricinus communis].	618	95.15	1193	0	AT3G60190.1	DYNAMIN-like 1E	624	83.65	1106	0	sp|Q9FNX5|DRP1E_ARATH	Dynamin-related protein 1E [Arabidopsis thaliana]	624	83.65	1106	0	SOLUBLE	NONE		PredHel=0
90	68	2	JT919755.1_c2	52	35841	2	0.22	312	35748.4	9.8	gi|359489239|ref|XP_002265553.2|	PREDICTED: dynamin-related protein 1E isoform 2 [Vitis vinifera].	262	90.08	492	2e-168	AT3G60190.1	DYNAMIN-like 1E	265	76.6	434	3e-148	sp|Q9FNX5|DRP1E_ARATH	Dynamin-related protein 1E [Arabidopsis thaliana]	265	76.6	434	4e-147	SOLUBLE	NONE		PredHel=0
94	72	1	JT948536.1_c2	55	22740	1	0.17	199	22525.4	7.95	gi|47681462|gb|AAT37501.1|	putative SNARE protein [Hevea brasiliensis].	199	99.5	414	1e-145	AT5G58060.1	SNARE-like superfamily protein	199	87.94	372	8e-132	sp|Q9ZRD6|YKT61_ARATH	VAMP-like protein YKT61 [Arabidopsis thaliana]	199	87.94	372	1e-130	SOLUBLE	NONE		PredHel=0
97	75	1	JT914456.1_c2	52	194165	1	0.02	1705	193146	5.08	gi|255574808|ref|XP_002528311.1|	clathrin heavy chain, putative [Ricinus communis].	1657	97.77	3337	0	AT3G11130.1	Clathrin, heavy chain	1657	93.9	3253	0	sp|Q0WNJ6|CLAH1_ARATH	Clathrin heavy chain 1 [Arabidopsis thaliana]	1657	93.9	3253	0	MEMBRANE	2	REGION 1-23,280-302	PredHel=0
98	76	1	JT941244.1_c3	51	21863	1	0.18	193	21763.2	8.66	gi|255557975|ref|XP_002520016.1|	ADP-ribosylation factor, arf, putative [Ricinus communis].	193	97.93	396	1e-138	AT5G17060.1	ADP-ribosylation factor B1B	191	91.1	370	5e-131	sp|P91924|ARF_DUGJA	ADP-ribosylation factor [Dugesia]	178	62.36	251	2e-83	SOLUBLE	NONE		PredHel=0
99	77	1	JT921291.1_1	49	68488	1	0.05	610	68187.5	7.9	gi|255537813|ref|XP_002509973.1|	dynamin, putative [Ricinus communis].	610	96.72	1222	0	AT5G42080.1	dynamin-like protein	610	88.69	1142	0	sp|Q39828|SDL5A_SOYBN	Dynamin-related protein 5A [Glycine]	610	90.82	1163	0	SOLUBLE	NONE		PredHel=0
108	86	1	JT944943.1_3	43	24986	2	0.33	225	24830.2	8.45	gi|462401488|gb|EMJ07045.1|	hypothetical protein PRUPE_ppa011070mg [Prunus persica].	225	91.11	432	8e-152	AT5G65270.1	RAB GTPase homolog A4A	224	86.61	406	2e-144	sp|Q40522|RB11D_TOBAC	Ras-related protein Rab11D [Nicotiana tabacum]	224	88.84	414	3e-146	SOLUBLE	NONE		PredHel=0
120	98	1	JT944400.1_c2	34	18544	1	0.21	167	18270	7.25	gi|255585404|ref|XP_002533397.1|	ARF GTPase activator, putative [Ricinus communis].	167	92.81	316	6e-108	AT5G47710.2	Calcium-dependent lipid-binding (CaLB domain) family protein	162	77.78	270	1e-92	sp|Q8LFN9|AGD13_ARATH	Probable ADP-ribosylation factor GTPase-activating protein AGD13 [Arabidopsis thaliana]	159	45.28	135	8e-37	SOLUBLE	NONE		PredHel=0

## Sheet: NR+小胞輸送
Supplemental Table X
								Primary Structure Information			BLASTP search against NR database						BLASTP search against TAIR10-pep database						BLASTP search against Swiss-Prot database						SOSUI			TMHMM
Entry No.	Family	Member	Accession	Score	Mass	Sequences	emPAI	Length	M.W. [Da]	pI	Beat Hit IDs	Best Hit Definition	Alignment Length	Identity	Bit Score	E-value	Beat Hit IDs	Best Hit Definition	Alignment Length	Identity	Bit Score	E-value	Beat Hit IDs	Best Hit Definition	Alignment Length	Identity	Bit Score	E-value	Protein Type	No. of Helix	Region of Helix	No. of Helix
1	1	1	JT948852.1_c2	5669	21625	7	4.1	203	21637.7	4.82	gi|37901161|gb|AAP46159.1|	REF-like stress related protein 1 [Hevea brasiliensis].	99	52.53	103	2e-24	AT3G05500.1	Rubber elongation factor protein (REF)	110	40	90.9	8e-22	sp|Q9SW70|SRP_VITRI	Stress-related protein [Vitis riparia]	94	47.87	97.8	4e-23	SOLUBLE	NONE		PredHel=0
2	2	1	JT939480.1_c1	4652	26150	9	2.88	242	26108.6	7.35	gi|37901161|gb|AAP46159.1|	REF-like stress related protein 1 [Hevea brasiliensis].	174	54.6	169	8e-49	AT3G05500.1	Rubber elongation factor protein (REF)	120	54.17	105	1e-26	sp|P15252|REF_HEVBR	Rubber elongation factor protein [Hevea]	124	48.39	112	4e-29	MEMBRANE	1	REGION 117-139	PredHel=0
3	2	2	JT942555.1_c1	4567	23621	9	3.46	222	23577.7	5.09	gi|37901161|gb|AAP46159.1|	REF-like stress related protein 1 [Hevea brasiliensis].	174	54.6	168	5e-49	AT3G05500.1	Rubber elongation factor protein (REF)	120	54.17	105	6e-27	sp|P15252|REF_HEVBR	Rubber elongation factor protein [Hevea]	124	48.39	111	3e-29	MEMBRANE	1	REGION 97-119	PredHel=0
4	3	1	JT951018.1_2	2640	14713	8	5.55	138	14721.6	4.79	gi|132270|sp|P15252.2|REF_HEVBR	RecName: Full=Rubber elongation factor protein; Short=REF; AltName:	138	100	277	2e-93	AT3G05500.1	Rubber elongation factor protein (REF)	118	48.31	100	4e-26	sp|P15252|REF_HEVBR	Rubber elongation factor protein [Hevea]	138	100	277	5e-95	SOLUBLE	NONE		PredHel=0
5	4	1	JT940643.1_c1	2301	41234	10	2.7	374	41202.3	9.03	gi|387778880|gb|AFJ97274.1|	beta-1,3-glucanase [Hevea brasiliensis].	374	99.73	765	0	AT4G16260.1	Glycosyl hydrolase superfamily protein	342	64.62	461	7e-162	sp|P52407|E13B_HEVBR	Glucan endo-1,3-beta-glucosidase, basic vacuolar isoform [Hevea brasiliensis]	374	95.99	712	0	SOLUBLE	NONE		PredHel=0
6	5	1	JT945746.1_2	2238	29535	15	11.59	257	29383.2	8.69	gi|255556087|ref|XP_002519078.1|	conserved hypothetical protein [Ricinus communis].	231	65.37	319	2e-106	AT1G11755.1	Undecaprenyl pyrophosphate synthetase family protein	234	50.85	251	2e-82	sp|Q96E22|NGBR_HUMAN	Nogo-B receptor [Homo sapiens]	197	23.86	72	2e-13	SOLUBLE	NONE		PredHel=0
10	8	1	JT949604.1_3	1093	22331	9	3.15	204	22344.4	4.53	gi|14423933|sp|O82803.1|SRPP_HEVBR	RecName: Full=Small rubber particle protein; Short=SRPP; AltName:	204	100	403	6e-141	AT3G05500.1	Rubber elongation factor protein (REF)	218	53.67	207	2e-66	sp|O82803|SRPP_HEVBR	Small rubber particle protein [Hevea brasiliensis]	204	100	403	1e-142	SOLUBLE	NONE		PredHel=0
12	10	1	JT937869.1_c3	558	23973	7	1.81	216	23816.7	8.02	gi|871510|emb|CAA90080.1|	small GTP-binding protein [Pisum sativum].	216	92.13	419	8e-147	AT5G59840.1	Ras-related small GTP-binding family protein	206	95.15	404	9e-144	sp|P28186|RAE1C_ARATH	Ras-related protein RABE1c [Arabidopsis thaliana]	206	94.17	402	8e-142	SOLUBLE	NONE		PredHel=0
13	10	2	JT944521.1_c3	519	23958	7	1.81	216	23801.7	8.02	gi|327505553|gb|AEA92304.1|	Rab2 [Hevea brasiliensis].	216	100	445	3e-157	AT5G59840.1	Ras-related small GTP-binding family protein	206	96.12	408	3e-145	sp|P28186|RAE1C_ARATH	Ras-related protein RABE1c [Arabidopsis thaliana]	206	95.15	405	3e-143	SOLUBLE	NONE		PredHel=0
14	10	3	JT947009.1_3	517	24043	7	1.8	216	23886.8	8.44	gi|327505559|gb|AEA92307.1|	Rab3 [Hevea brasiliensis].	216	100	446	2e-157	AT5G59840.1	Ras-related small GTP-binding family protein	206	94.66	403	2e-143	sp|P28186|RAE1C_ARATH	Ras-related protein RABE1c [Arabidopsis thaliana]	206	93.69	401	1e-141	SOLUBLE	NONE		PredHel=0
15	10	4	JT946657.1_3	508	24056	7	1.8	216	23899.8	8.02	gi|302595187|gb|ADL59582.1|	Rab1 [Hevea brasiliensis].	216	99.54	444	1e-156	AT5G59840.1	Ras-related small GTP-binding family protein	206	95.63	406	1e-144	sp|P28186|RAE1C_ARATH	Ras-related protein RABE1c [Arabidopsis thaliana]	206	94.66	404	9e-143	SOLUBLE	NONE		PredHel=0
16	10	5	JT950598.1_c2	425	22771	5	1.54	202	22500.4	5.06	gi|327505561|gb|AEA92308.1|	Rab4 [Hevea brasiliensis].	202	100	418	4e-147	AT3G11730.1	Ras-related small GTP-binding family protein	204	86.27	362	8e-128	sp|Q9ZRE2|RABD1_ARATH	Ras-related protein RABD1 [Arabidopsis thaliana]	204	86.27	362	1e-126	SOLUBLE	NONE		PredHel=0
17	10	6	JT945059.1_c1	357	22833	6	1.53	203	22619.3	5.06	gi|390979747|gb|AFM30910.1|	small GTPase [Hevea brasiliensis].	203	100	425	1e-149	AT4G17530.1	RAB GTPase homolog 1C	203	91.63	390	9e-139	sp|Q05737|YPTM2_MAIZE	GTP-binding protein YPTM2 [Zea mays]	203	93.6	399	3e-141	SOLUBLE	NONE		PredHel=0
18	10	7	JT944033.1_c3	246	22796	4	0.86	203	22582.3	5.05	gi|224074217|ref|XP_002304305.1|	predicted protein [Populus trichocarpa].	203	94.58	405	4e-142	AT1G02130.1	RAS 5	203	89.66	392	2e-139	sp|P28188|RAD2A_ARATH	Ras-related protein RABD2a [Arabidopsis thaliana]	203	89.66	392	3e-138	SOLUBLE	NONE		PredHel=0
19	10	8	JT941172.1_c1	241	23201	6	1.91	208	23101.2	8.65	gi|460367695|ref|XP_004229706.1|	PREDICTED: ras-related protein RABH1b-like [Solanum lycopersicum].	208	96.15	414	2e-145	AT2G44610.1	Ras-related small GTP-binding family protein	208	93.27	403	2e-143	sp|O80501|RAH1B_ARATH	Ras-related protein RABH1b [Arabidopsis thaliana]	208	93.27	403	2e-142	SOLUBLE	NONE		PredHel=0
20	10	9	JT945574.1_2	113	23912	2	0.35	210	23584.8	6.04	gi|224062966|ref|XP_002300952.1|	predicted protein [Populus trichocarpa].	207	95.17	407	2e-142	AT1G43890.3	RAB GTPASE HOMOLOG B18	200	92	376	7e-133	sp|O23657|RABC1_ARATH	Ras-related protein RABC1 [Arabidopsis thaliana]	200	92	376	9e-132	SOLUBLE	NONE		PredHel=0
21	11	1	JT924151.1_c2	495	57374	12	1.57	503	57011.4	6.57	gi|255543106|ref|XP_002512616.1|	interferon-induced GTP-binding protein mx, putative [Ricinus	503	77.34	821	0	AT1G60500.1	Dynamin related protein 4C	501	56.49	589	0	sp|Q9ZP55|DRP4C_ARATH	Dynamin-related protein 4C [Arabidopsis thaliana]	501	56.49	589	0	SOLUBLE	NONE		PredHel=0
22	12	1	JT957715.1_2	482	17567	8	3.93	154	17463.9	4.7	gi|37901161|gb|AAP46159.1|	REF-like stress related protein 1 [Hevea brasiliensis].	178	53.93	173	5e-52	AT3G05500.1	Rubber elongation factor protein (REF)	110	56.36	105	1e-27	sp|O82803|SRPP_HEVBR	Small rubber particle protein [Hevea brasiliensis]	105	56.19	115	6e-31	MEMBRANE	1	REGION 32-54	PredHel=0
23	13	1	JT945402.1_1	434	22048	11	6.98	193	22005.2	7.65	gi|225437537|ref|XP_002275765.1|	PREDICTED: GTP-binding protein SAR1A [Vitis vinifera].	193	98.96	393	1e-137	AT4G02080.1	secretion-associated RAS super family 2	193	94.82	383	2e-136	sp|O04834|SAR1A_ARATH	GTP-binding protein SAR1A [Arabidopsis thaliana]	193	94.82	383	3e-135	SOLUBLE	NONE		PredHel=0
24	13	2	JT943935.1_c1	359	22140	8	3.94	193	22096.4	6.96	gi|255548481|ref|XP_002515297.1|	GTP-binding protein sar1, putative [Ricinus communis].	193	97.93	390	3e-136	AT4G02080.1	secretion-associated RAS super family 2	193	93.78	381	2e-135	sp|O04834|SAR1A_ARATH	GTP-binding protein SAR1A [Arabidopsis thaliana]	193	93.78	381	2e-134	SOLUBLE	NONE		PredHel=0
26	15	1	JT948343.1_1	399	19613	7	2.5	175	19624.9	4.86	gi|38122474|gb|AAR11448.1|	rubber elongation factor [Hevea brasiliensis].	175	99.43	347	4e-120	AT3G05500.1	Rubber elongation factor protein (REF)	111	55.86	105	2e-27	sp|P15252|REF_HEVBR	Rubber elongation factor protein [Hevea]	133	54.14	139	3e-40	SOLUBLE	NONE		PredHel=0
30	18	1	JT952583.1_c2	256	23563	6	1.46	211	23349.2	7.96	gi|255570175|ref|XP_002526048.1|	protein with unknown function [Ricinus communis].	210	97.62	430	2e-151	AT4G35860.1	GTP-binding 2	211	91.94	413	1e-147	sp|Q38922|RAB1B_ARATH	Ras-related protein RABB1b [Arabidopsis thaliana]	211	91.94	413	2e-146	SOLUBLE	NONE		PredHel=0
31	18	2	JT941238.1_3	192	10671	4	2.58	100	10506.7	5.69	gi|255568502|ref|XP_002525225.1|	protein with unknown function [Ricinus communis].	100	99	207	4e-66	AT4G17170.1	RAB GTPase homolog B1C	99	96.97	202	2e-66	sp|P92963|RAB1C_ARATH	Ras-related protein RABB1c [Arabidopsis thaliana]	99	96.97	202	2e-65	SOLUBLE	NONE		PredHel=0
32	19	1	JT943972.1_1	300	23324	9	3.56	206	22996.7	4.81	gi|224103431|ref|XP_002313053.1|	predicted protein [Populus trichocarpa].	206	98.54	424	3e-149	AT3G18820.1	RAB GTPase homolog G3F	206	93.2	404	4e-144	sp|P31022|RAB7_PEA	Ras-related protein Rab7 [Pisum]	206	95.15	412	4e-146	SOLUBLE	NONE		PredHel=0
33	19	2	JT944915.1_c2	260	23297	8	2.92	206	22969.7	4.69	gi|224103431|ref|XP_002313053.1|	predicted protein [Populus trichocarpa].	206	97.57	421	7e-148	AT3G18820.1	RAB GTPase homolog G3F	206	93.2	403	7e-144	sp|P31022|RAB7_PEA	Ras-related protein Rab7 [Pisum]	206	93.69	407	2e-144	SOLUBLE	NONE		PredHel=0
34	20	1	JT937325.1_3	296	33119	6	0.91	284	32797.8	8.11	gi|16751461|dbj|BAB71777.1|	cis-prenyltransferase [Hevea brasiliensis].	284	97.54	577	0	AT2G17570.1	Undecaprenyl pyrophosphate synthetase family protein	271	56.83	316	7e-107	sp|Q8W3U4|HRT2_HEVBR	Rubber cis-polyprenyltransferase HRT2 [Hevea brasiliensis]	284	97.54	574	0	SOLUBLE	NONE		PredHel=0
40	26	1	JT946133.1_c3	213	24347	4	0.79	216	24019.8	4.27	gi|255542728|ref|XP_002512427.1|	Rubber elongation factor protein, putative [Ricinus communis].	231	50.65	204	4e-62	AT3G05500.1	Rubber elongation factor protein (REF)	217	43.78	161	3e-48	sp|O82803|SRPP_HEVBR	Small rubber particle protein [Hevea brasiliensis]	205	49.76	182	1e-55	SOLUBLE	NONE		PredHel=0
41	27	1	JT939205.1_c1	211	27055	6	1.2	243	26957.6	6.8	gi|255542728|ref|XP_002512427.1|	Rubber elongation factor protein, putative [Ricinus communis].	240	84.58	413	9e-144	AT3G05500.1	Rubber elongation factor protein (REF)	227	69.16	318	6e-109	sp|Q9MA63|Y3550_ARATH	REF/SRPP-like protein At3g05500 [Arabidopsis thaliana]	227	69.16	318	9e-108	SOLUBLE	NONE		PredHel=0
45	29	1	JT944240.1_c3	198	24305	5	1.07	218	24206	5.42	gi|255562484|ref|XP_002522248.1|	protein with unknown function [Ricinus communis].	218	99.54	445	5e-157	AT5G45750.1	RAB GTPase homolog A1C	218	87.16	394	1e-139	sp|Q9FK68|RAA1C_ARATH	Ras-related protein RABA1c [Arabidopsis thaliana]	218	87.16	394	2e-138	SOLUBLE	NONE		PredHel=0
46	29	2	JT948813.1_3	189	22056	5	1.22	201	21955.7	6.53	gi|224113085|ref|XP_002316386.1|	predicted protein [Populus trichocarpa].	199	93.47	393	5e-137	AT3G54840.1	Ras-related small GTP-binding family protein	202	88.61	368	3e-130	sp|Q9CB01|RABF1_ARATH	Ras-related protein RABF1 [Arabidopsis thaliana]	202	88.61	368	5e-129	SOLUBLE	NONE		PredHel=0
47	29	3	JT945020.1_1	177	18166	4	1.16	168	18063.3	7.51	gi|255577452|ref|XP_002529605.1|	protein with unknown function [Ricinus communis].	164	92.07	312	2e-105	AT3G54840.2	Ras-related small GTP-binding family protein	166	87.35	293	3e-101	sp|Q9CB01|RABF1_ARATH	Ras-related protein RABF1 [Arabidopsis thaliana]	166	87.35	293	8e-100	SOLUBLE	NONE		PredHel=0
48	29	4	JT945065.1_1	140	21871	3	0.62	200	21770.6	7.25	gi|449455421|ref|XP_004145451.1|	PREDICTED: ras-related protein RABF2b-like [Cucumis sativus].	200	94	391	2e-136	AT5G45130.1	RAB homolog 1	200	88	369	1e-130	sp|P31582|RAF2A_ARATH	Ras-related protein RABF2a [Arabidopsis thaliana]	200	88	369	2e-129	SOLUBLE	NONE		PredHel=0
49	29	5	JT950302.1_1	119	24028	4	0.8	215	23871.7	6.54	gi|255570960|ref|XP_002526431.1|	protein with unknown function [Ricinus communis].	215	96.28	429	8e-151	AT1G09630.1	RAB GTPase 11C	217	91.24	402	4e-143	sp|O04486|RAA2A_ARATH	Ras-related protein RABA2a [Arabidopsis thaliana]	217	91.24	402	5e-142	SOLUBLE	NONE		PredHel=0
59	38	1	JT942264.1_c1	133	25638	3	0.51	230	25540.2	9.43	gi|255547720|ref|XP_002514917.1|	Small rubber particle protein, putative [Ricinus communis].	229	75.55	327	3e-110	AT1G67360.1	Rubber elongation factor protein (REF)	233	57.08	258	1e-85	sp|Q9FYF7|Y1736_ARATH	REF/SRPP-like protein At1g67360 [Arabidopsis thaliana]	233	57.08	258	1e-84	SOLUBLE	NONE		PredHel=0
60	39	1	JT933735.1_c1	128	25104	2	0.33	225	25005.1	6.95	gi|255544246|ref|XP_002513185.1|	protein with unknown function [Ricinus communis].	225	89.78	426	2e-149	AT5G47960.1	RAB GTPase homolog A4C	225	79.56	377	1e-132	sp|Q9FE79|RAA4C_ARATH	Ras-related protein RABA4c [Arabidopsis thaliana]	225	79.56	377	1e-131	SOLUBLE	NONE		PredHel=0
67	46	1	JT916348.1_c3	116	52650	4	0.32	460	52510.7	9.04	gi|255572477|ref|XP_002527173.1|	conserved hypothetical protein [Ricinus communis].	433	80.6	686	0	AT5G52580.1	RabGAP/TBC domain-containing protein	465	65.81	603	0	sp|Q8TC07|TBC15_HUMAN	TBC1 domain family member 15 [Homo sapiens]	142	49.3	150	5e-38	MEMBRANE	1	REGION 95-117	PredHel=1
74	53	1	JT938614.1_2	95	23702	2	0.35	209	23374.5	5.43	gi|224093425|ref|XP_002309918.1|	predicted protein [Populus trichocarpa].	209	93.3	405	1e-141	AT1G43890.3	RAB GTPASE HOMOLOG B18	200	88	366	5e-129	sp|O23657|RABC1_ARATH	Ras-related protein RABC1 [Arabidopsis thaliana]	200	88	366	6e-128	SOLUBLE	NONE		PredHel=0
75	54	1	JT946100.1_c2	93	21378	1	0.18	187	21391.4	10.29	gi|255574399|ref|XP_002528113.1|	conserved hypothetical protein [Ricinus communis].	187	72.19	244	8e-78	AT3G51890.1	Clathrin light chain protein	153	71.9	208	1e-66	sp|F4J5M9|CLC3_ARATH	Clathrin light chain 3 [Arabidopsis thaliana]	153	71.9	208	1e-65	SOLUBLE	NONE		PredHel=0
86	65	1	JT918818.1_2	66	94855	2	0.08	868	94627.1	9.45	gi|225465253|ref|XP_002268311.1|	PREDICTED: dynamin-2B [Vitis vinifera].	871	84.85	1482	0	AT1G59610.1	dynamin-like 3	875	81.14	1375	0	sp|Q9LQ55|DRP2B_ARATH	Dynamin-2B [Arabidopsis thaliana]	875	81.14	1375	0	SOLUBLE	NONE		PredHel=0
89	68	1	JT922578.1_1	63	69198	2	0.11	614	68955	7.65	gi|255571115|ref|XP_002526508.1|	dynamin, putative [Ricinus communis].	618	95.15	1193	0	AT3G60190.1	DYNAMIN-like 1E	624	83.65	1106	0	sp|Q9FNX5|DRP1E_ARATH	Dynamin-related protein 1E [Arabidopsis thaliana]	624	83.65	1106	0	SOLUBLE	NONE		PredHel=0
90	68	2	JT919755.1_c2	52	35841	2	0.22	312	35748.4	9.8	gi|359489239|ref|XP_002265553.2|	PREDICTED: dynamin-related protein 1E isoform 2 [Vitis vinifera].	262	90.08	492	2e-168	AT3G60190.1	DYNAMIN-like 1E	265	76.6	434	3e-148	sp|Q9FNX5|DRP1E_ARATH	Dynamin-related protein 1E [Arabidopsis thaliana]	265	76.6	434	4e-147	SOLUBLE	NONE		PredHel=0
94	72	1	JT948536.1_c2	55	22740	1	0.17	199	22525.4	7.95	gi|47681462|gb|AAT37501.1|	putative SNARE protein [Hevea brasiliensis].	199	99.5	414	1e-145	AT5G58060.1	SNARE-like superfamily protein	199	87.94	372	8e-132	sp|Q9ZRD6|YKT61_ARATH	VAMP-like protein YKT61 [Arabidopsis thaliana]	199	87.94	372	1e-130	SOLUBLE	NONE		PredHel=0
97	75	1	JT914456.1_c2	52	194165	1	0.02	1705	193146	5.08	gi|255574808|ref|XP_002528311.1|	clathrin heavy chain, putative [Ricinus communis].	1657	97.77	3337	0	AT3G11130.1	Clathrin, heavy chain	1657	93.9	3253	0	sp|Q0WNJ6|CLAH1_ARATH	Clathrin heavy chain 1 [Arabidopsis thaliana]	1657	93.9	3253	0	MEMBRANE	2	REGION 1-23,280-302	PredHel=0
98	76	1	JT941244.1_c3	51	21863	1	0.18	193	21763.2	8.66	gi|255557975|ref|XP_002520016.1|	ADP-ribosylation factor, arf, putative [Ricinus communis].	193	97.93	396	1e-138	AT5G17060.1	ADP-ribosylation factor B1B	191	91.1	370	5e-131	sp|P91924|ARF_DUGJA	ADP-ribosylation factor [Dugesia]	178	62.36	251	2e-83	SOLUBLE	NONE		PredHel=0
99	77	1	JT921291.1_1	49	68488	1	0.05	610	68187.5	7.9	gi|255537813|ref|XP_002509973.1|	dynamin, putative [Ricinus communis].	610	96.72	1222	0	AT5G42080.1	dynamin-like protein	610	88.69	1142	0	sp|Q39828|SDL5A_SOYBN	Dynamin-related protein 5A [Glycine]	610	90.82	1163	0	SOLUBLE	NONE		PredHel=0
108	86	1	JT944943.1_3	43	24986	2	0.33	225	24830.2	8.45	gi|462401488|gb|EMJ07045.1|	hypothetical protein PRUPE_ppa011070mg [Prunus persica].	225	91.11	432	8e-152	AT5G65270.1	RAB GTPase homolog A4A	224	86.61	406	2e-144	sp|Q40522|RB11D_TOBAC	Ras-related protein Rab11D [Nicotiana tabacum]	224	88.84	414	3e-146	SOLUBLE	NONE		PredHel=0
120	98	1	JT944400.1_c2	34	18544	1	0.21	167	18270	7.25	gi|255585404|ref|XP_002533397.1|	ARF GTPase activator, putative [Ricinus communis].	167	92.81	316	6e-108	AT5G47710.2	Calcium-dependent lipid-binding (CaLB domain) family protein	162	77.78	270	1e-92	sp|Q8LFN9|AGD13_ARATH	Probable ADP-ribosylation factor GTPase-activating protein AGD13 [Arabidopsis thaliana]	159	45.28	135	8e-37	SOLUBLE	NONE		PredHel=0

## Sheet: Sheet1
Supplemental Table X
								Primary Structure Information			BLASTP search against NR database						BLASTP search against TAIR10-pep database						BLASTP search against Swiss-Prot database						SOSUI			TMHMM
Entry No.	Family	Member	Accession	Score	Mass	Sequences	emPAI	Length	M.W. [Da]	pI	Beat Hit IDs	Best Hit Definition	Alignment Length	Identity	Bit Score	E-value	Beat Hit IDs	Best Hit Definition	Alignment Length	Identity	Bit Score	E-value	Beat Hit IDs	Best Hit Definition	Alignment Length	Identity	Bit Score	E-value	Protein Type	No. of Helix	Region of Helix	No. of Helix
1	1	1	JT948852.1_c2	5669	21625	7	4.1	203	21637.7	4.82	gi|37901161|gb|AAP46159.1|	REF-like stress related protein 1 [Hevea brasiliensis].	99	52.53	103	2e-24	AT3G05500.1	Rubber elongation factor protein (REF)	110	40	90.9	8e-22	sp|Q9SW70|SRP_VITRI	Stress-related protein [Vitis riparia]	94	47.87	97.8	4e-23	SOLUBLE	NONE		PredHel=0
2	2	1	JT939480.1_c1	4652	26150	9	2.88	242	26108.6	7.35	gi|37901161|gb|AAP46159.1|	REF-like stress related protein 1 [Hevea brasiliensis].	174	54.6	169	8e-49	AT3G05500.1	Rubber elongation factor protein (REF)	120	54.17	105	1e-26	sp|P15252|REF_HEVBR	Rubber elongation factor protein [Hevea]	124	48.39	112	4e-29	MEMBRANE	1	REGION 117-139	PredHel=0
3	2	2	JT942555.1_c1	4567	23621	9	3.46	222	23577.7	5.09	gi|37901161|gb|AAP46159.1|	REF-like stress related protein 1 [Hevea brasiliensis].	174	54.6	168	5e-49	AT3G05500.1	Rubber elongation factor protein (REF)	120	54.17	105	6e-27	sp|P15252|REF_HEVBR	Rubber elongation factor protein [Hevea]	124	48.39	111	3e-29	MEMBRANE	1	REGION 97-119	PredHel=0
4	3	1	JT951018.1_2	2640	14713	8	5.55	138	14721.6	4.79	gi|132270|sp|P15252.2|REF_HEVBR	RecName: Full=Rubber elongation factor protein; Short=REF; AltName:	138	100	277	2e-93	AT3G05500.1	Rubber elongation factor protein (REF)	118	48.31	100	4e-26	sp|P15252|REF_HEVBR	Rubber elongation factor protein [Hevea]	138	100	277	5e-95	SOLUBLE	NONE		PredHel=0
5	4	1	JT940643.1_c1	2301	41234	10	2.7	374	41202.3	9.03	gi|387778880|gb|AFJ97274.1|	beta-1,3-glucanase [Hevea brasiliensis].	374	99.73	765	0	AT4G16260.1	Glycosyl hydrolase superfamily protein	342	64.62	461	7e-162	sp|P52407|E13B_HEVBR	Glucan endo-1,3-beta-glucosidase, basic vacuolar isoform [Hevea brasiliensis]	374	95.99	712	0	SOLUBLE	NONE		PredHel=0
6	5	1	JT945746.1_2	2238	29535	15	11.59	257	29383.2	8.69	gi|255556087|ref|XP_002519078.1|	conserved hypothetical protein [Ricinus communis].	231	65.37	319	2e-106	AT1G11755.1	Undecaprenyl pyrophosphate synthetase family protein	234	50.85	251	2e-82	sp|Q96E22|NGBR_HUMAN	Nogo-B receptor [Homo sapiens]	197	23.86	72	2e-13	SOLUBLE	NONE		PredHel=0
7	6	1	JT934730.1_1	1516	48604	12	2.04	444	48348.5	4.94	gi|224078263|ref|XP_002305512.1|	predicted protein [Populus trichocarpa].	450	71.33	634	0	AT2G17840.1	Senescence/dehydration-associated protein-related	445	56.85	489	7e-170	sp|Q8R1X6|SPG20_MOUSE	Spartin [Mus musculus]	221	25.79	54.3	2e-06	SOLUBLE	NONE		PredHel=0
8	6	2	JT948017.1_c1	208	24159	2	0.34	224	24002.7	10.73	gi|255577538|ref|XP_002529647.1|	conserved hypothetical protein [Ricinus communis].	197	88.32	367	8e-123	AT2G17840.1	Senescence/dehydration-associated protein-related	221	75.11	351	2e-119	sp|Q8N0X7|SPG20_HUMAN	Spartin [Homo sapiens]	187	25.67	48.9	1e-05	SOLUBLE	NONE		PredHel=0
9	7	1	JT927700.1_c3	1627	56162	25	7.33	500	55968.7	8.27	gi|255576897|ref|XP_002529334.1|	cytochrome P450, putative [Ricinus communis].	502	77.69	808	0	AT4G15440.1	hydroperoxide lyase 1	384	60.94	501	1e-174	sp|P48417|CP74_LINUS	Allene oxide synthase, chloroplastic [Linum usitatissimum]	485	41.03	407	1e-134	SOLUBLE	NONE		PredHel=0
10	8	1	JT949604.1_3	1093	22331	9	3.15	204	22344.4	4.53	gi|14423933|sp|O82803.1|SRPP_HEVBR	RecName: Full=Small rubber particle protein; Short=SRPP; AltName:	204	100	403	6e-141	AT3G05500.1	Rubber elongation factor protein (REF)	218	53.67	207	2e-66	sp|O82803|SRPP_HEVBR	Small rubber particle protein [Hevea brasiliensis]	204	100	403	1e-142	SOLUBLE	NONE		PredHel=0
11	9	1	JT940751.1_c1	801	37785	4	0.46	345	37466.2	6.78	gi|225467859|ref|XP_002271974.1|	PREDICTED: chlorophyllase-1 [Vitis vinifera].	306	59.48	340	5e-112	AT1G19670.1	chlorophyllase 1	337	43.62	256	5e-82	sp|Q9LE89|CLH0_CHEAL	Chlorophyllase type 0 [Chenopodium album]	320	47.19	273	2e-87	SOLUBLE	NONE		PredHel=0
12	10	1	JT937869.1_c3	558	23973	7	1.81	216	23816.7	8.02	gi|871510|emb|CAA90080.1|	small GTP-binding protein [Pisum sativum].	216	92.13	419	8e-147	AT5G59840.1	Ras-related small GTP-binding family protein	206	95.15	404	9e-144	sp|P28186|RAE1C_ARATH	Ras-related protein RABE1c [Arabidopsis thaliana]	206	94.17	402	8e-142	SOLUBLE	NONE		PredHel=0
13	10	2	JT944521.1_c3	519	23958	7	1.81	216	23801.7	8.02	gi|327505553|gb|AEA92304.1|	Rab2 [Hevea brasiliensis].	216	100	445	3e-157	AT5G59840.1	Ras-related small GTP-binding family protein	206	96.12	408	3e-145	sp|P28186|RAE1C_ARATH	Ras-related protein RABE1c [Arabidopsis thaliana]	206	95.15	405	3e-143	SOLUBLE	NONE		PredHel=0
14	10	3	JT947009.1_3	517	24043	7	1.8	216	23886.8	8.44	gi|327505559|gb|AEA92307.1|	Rab3 [Hevea brasiliensis].	216	100	446	2e-157	AT5G59840.1	Ras-related small GTP-binding family protein	206	94.66	403	2e-143	sp|P28186|RAE1C_ARATH	Ras-related protein RABE1c [Arabidopsis thaliana]	206	93.69	401	1e-141	SOLUBLE	NONE		PredHel=0
15	10	4	JT946657.1_3	508	24056	7	1.8	216	23899.8	8.02	gi|302595187|gb|ADL59582.1|	Rab1 [Hevea brasiliensis].	216	99.54	444	1e-156	AT5G59840.1	Ras-related small GTP-binding family protein	206	95.63	406	1e-144	sp|P28186|RAE1C_ARATH	Ras-related protein RABE1c [Arabidopsis thaliana]	206	94.66	404	9e-143	SOLUBLE	NONE		PredHel=0
16	10	5	JT950598.1_c2	425	22771	5	1.54	202	22500.4	5.06	gi|327505561|gb|AEA92308.1|	Rab4 [Hevea brasiliensis].	202	100	418	4e-147	AT3G11730.1	Ras-related small GTP-binding family protein	204	86.27	362	8e-128	sp|Q9ZRE2|RABD1_ARATH	Ras-related protein RABD1 [Arabidopsis thaliana]	204	86.27	362	1e-126	SOLUBLE	NONE		PredHel=0
17	10	6	JT945059.1_c1	357	22833	6	1.53	203	22619.3	5.06	gi|390979747|gb|AFM30910.1|	small GTPase [Hevea brasiliensis].	203	100	425	1e-149	AT4G17530.1	RAB GTPase homolog 1C	203	91.63	390	9e-139	sp|Q05737|YPTM2_MAIZE	GTP-binding protein YPTM2 [Zea mays]	203	93.6	399	3e-141	SOLUBLE	NONE		PredHel=0
18	10	7	JT944033.1_c3	246	22796	4	0.86	203	22582.3	5.05	gi|224074217|ref|XP_002304305.1|	predicted protein [Populus trichocarpa].	203	94.58	405	4e-142	AT1G02130.1	RAS 5	203	89.66	392	2e-139	sp|P28188|RAD2A_ARATH	Ras-related protein RABD2a [Arabidopsis thaliana]	203	89.66	392	3e-138	SOLUBLE	NONE		PredHel=0
19	10	8	JT941172.1_c1	241	23201	6	1.91	208	23101.2	8.65	gi|460367695|ref|XP_004229706.1|	PREDICTED: ras-related protein RABH1b-like [Solanum lycopersicum].	208	96.15	414	2e-145	AT2G44610.1	Ras-related small GTP-binding family protein	208	93.27	403	2e-143	sp|O80501|RAH1B_ARATH	Ras-related protein RABH1b [Arabidopsis thaliana]	208	93.27	403	2e-142	SOLUBLE	NONE		PredHel=0
20	10	9	JT945574.1_2	113	23912	2	0.35	210	23584.8	6.04	gi|224062966|ref|XP_002300952.1|	predicted protein [Populus trichocarpa].	207	95.17	407	2e-142	AT1G43890.3	RAB GTPASE HOMOLOG B18	200	92	376	7e-133	sp|O23657|RABC1_ARATH	Ras-related protein RABC1 [Arabidopsis thaliana]	200	92	376	9e-132	SOLUBLE	NONE		PredHel=0
21	11	1	JT924151.1_c2	495	57374	12	1.57	503	57011.4	6.57	gi|255543106|ref|XP_002512616.1|	interferon-induced GTP-binding protein mx, putative [Ricinus	503	77.34	821	0	AT1G60500.1	Dynamin related protein 4C	501	56.49	589	0	sp|Q9ZP55|DRP4C_ARATH	Dynamin-related protein 4C [Arabidopsis thaliana]	501	56.49	589	0	SOLUBLE	NONE		PredHel=0
22	12	1	JT957715.1_2	482	17567	8	3.93	154	17463.9	4.7	gi|37901161|gb|AAP46159.1|	REF-like stress related protein 1 [Hevea brasiliensis].	178	53.93	173	5e-52	AT3G05500.1	Rubber elongation factor protein (REF)	110	56.36	105	1e-27	sp|O82803|SRPP_HEVBR	Small rubber particle protein [Hevea brasiliensis]	105	56.19	115	6e-31	MEMBRANE	1	REGION 32-54	PredHel=0
23	13	1	JT945402.1_1	434	22048	11	6.98	193	22005.2	7.65	gi|225437537|ref|XP_002275765.1|	PREDICTED: GTP-binding protein SAR1A [Vitis vinifera].	193	98.96	393	1e-137	AT4G02080.1	secretion-associated RAS super family 2	193	94.82	383	2e-136	sp|O04834|SAR1A_ARATH	GTP-binding protein SAR1A [Arabidopsis thaliana]	193	94.82	383	3e-135	SOLUBLE	NONE		PredHel=0
24	13	2	JT943935.1_c1	359	22140	8	3.94	193	22096.4	6.96	gi|255548481|ref|XP_002515297.1|	GTP-binding protein sar1, putative [Ricinus communis].	193	97.93	390	3e-136	AT4G02080.1	secretion-associated RAS super family 2	193	93.78	381	2e-135	sp|O04834|SAR1A_ARATH	GTP-binding protein SAR1A [Arabidopsis thaliana]	193	93.78	381	2e-134	SOLUBLE	NONE		PredHel=0
25	14	1	JT943210.1_3	421	33996	7	1.58	310	33618	8.43	gi|20981684|sp|P23472.2|CHLY_HEVBR	RecName: Full=Hevamine-A; Includes: RecName: Full=Chitinase;	310	99.35	633	0	AT5G24090.1	chitinase A	299	70.23	445	5e-157	sp|P23472|CHLY_HEVBR	Hevamine-A [Hevea]	310	99.35	633	0	SOLUBLE	NONE		PredHel=1
26	15	1	JT948343.1_1	399	19613	7	2.5	175	19624.9	4.86	gi|38122474|gb|AAR11448.1|	rubber elongation factor [Hevea brasiliensis].	175	99.43	347	4e-120	AT3G05500.1	Rubber elongation factor protein (REF)	111	55.86	105	2e-27	sp|P15252|REF_HEVBR	Rubber elongation factor protein [Hevea]	133	54.14	139	3e-40	SOLUBLE	NONE		PredHel=0
27	16	1	JT927427.1_c1	345	52802	6	0.61	478	52492.4	4.69	gi|255555707|ref|XP_002518889.1|	UBX domain-containing protein, putative [Ricinus communis].	485	83.09	704	0	AT4G10790.1	UBX domain-containing protein	495	68.08	632	0	sp|Q6GQ69|FAF2B_XENLA	FAS-associated factor 2-B [Xenopus laevis]	480	30.83	204	3e-58	MEMBRANE	2	REGION 91-113,124-146	PredHel=1
28	16	2	JT938193.1_3	268	36047	5	0.81	313	35898.1	4.96	gi|255555707|ref|XP_002518889.1|	UBX domain-containing protein, putative [Ricinus communis].	314	89.81	514	9e-179	AT4G10790.1	UBX domain-containing protein	316	75.63	472	5e-165	sp|Q6GQ69|FAF2B_XENLA	FAS-associated factor 2-B [Xenopus laevis]	317	35.65	175	3e-49	SOLUBLE	NONE		PredHel=0
29	17	1	JT920903.1_2	317	66450	8	0.54	608	65978.3	7.96	gi|224101561|ref|XP_002312331.1|	predicted protein [Populus trichocarpa].	608	96.88	1192	0	AT5G49460.1	ATP citrate lyase subunit B 2	608	93.59	1144	0	sp|Q93VT8|ACLB1_ORYSJ	ATP-citrate synthase beta chain protein 1 [Oryza sativa subsp. japonica]	608	93.26	1157	0	SOLUBLE	NONE		PredHel=0
30	18	1	JT952583.1_c2	256	23563	6	1.46	211	23349.2	7.96	gi|255570175|ref|XP_002526048.1|	protein with unknown function [Ricinus communis].	210	97.62	430	2e-151	AT4G35860.1	GTP-binding 2	211	91.94	413	1e-147	sp|Q38922|RAB1B_ARATH	Ras-related protein RABB1b [Arabidopsis thaliana]	211	91.94	413	2e-146	SOLUBLE	NONE		PredHel=0
31	18	2	JT941238.1_3	192	10671	4	2.58	100	10506.7	5.69	gi|255568502|ref|XP_002525225.1|	protein with unknown function [Ricinus communis].	100	99	207	4e-66	AT4G17170.1	RAB GTPase homolog B1C	99	96.97	202	2e-66	sp|P92963|RAB1C_ARATH	Ras-related protein RABB1c [Arabidopsis thaliana]	99	96.97	202	2e-65	SOLUBLE	NONE		PredHel=0
32	19	1	JT943972.1_1	300	23324	9	3.56	206	22996.7	4.81	gi|224103431|ref|XP_002313053.1|	predicted protein [Populus trichocarpa].	206	98.54	424	3e-149	AT3G18820.1	RAB GTPase homolog G3F	206	93.2	404	4e-144	sp|P31022|RAB7_PEA	Ras-related protein Rab7 [Pisum]	206	95.15	412	4e-146	SOLUBLE	NONE		PredHel=0
33	19	2	JT944915.1_c2	260	23297	8	2.92	206	22969.7	4.69	gi|224103431|ref|XP_002313053.1|	predicted protein [Populus trichocarpa].	206	97.57	421	7e-148	AT3G18820.1	RAB GTPase homolog G3F	206	93.2	403	7e-144	sp|P31022|RAB7_PEA	Ras-related protein Rab7 [Pisum]	206	93.69	407	2e-144	SOLUBLE	NONE		PredHel=0
34	20	1	JT937325.1_3	296	33119	6	0.91	284	32797.8	8.11	gi|16751461|dbj|BAB71777.1|	cis-prenyltransferase [Hevea brasiliensis].	284	97.54	577	0	AT2G17570.1	Undecaprenyl pyrophosphate synthetase family protein	271	56.83	316	7e-107	sp|Q8W3U4|HRT2_HEVBR	Rubber cis-polyprenyltransferase HRT2 [Hevea brasiliensis]	284	97.54	574	0	SOLUBLE	NONE		PredHel=0
35	21	1	JT934302.1_2	294	31528	5	0.76	274	31320	8.99	gi|55831356|gb|AAV66577.1|	lipase [Ricinus communis].	270	57.78	354	5e-116	AT3G14360.1	alpha/beta-Hydrolases superfamily protein	273	50.55	276	8e-89	sp|B8NIB8|FAEA_ASPFN	Probable feruloyl esterase A [Aspergillus flavus (strain ATCC 200026 / FGSC A1120 / NRRL 3357 / JCM 12722 / SRRC 167)]	158	28.48	58.2	1e-08	SOLUBLE	NONE		PredHel=0
36	22	1	JT928130.1_1	272	41897	7	0.82	377	41695.4	5.16	gi|224055984|ref|XP_002298710.1|	actin 1 [Populus trichocarpa].	377	100	784	0	AT5G09810.1	actin 7	377	98.67	775	0	sp|P53492|ACT7_ARATH	Actin-7 [Arabidopsis thaliana]	377	98.67	775	0	SOLUBLE	NONE		PredHel=0
37	23	1	JT949354.1_c3	262	20724	8	3.6	183	20623.2	8.22	gi|313586569|gb|ADR71295.1|	hypothetical protein 19 [Hevea brasiliensis].	183	100	379	2e-132	AT2G39050.1	hydroxyproline-rich glycoprotein family protein	155	66.45	219	3e-70	sp|D5UJ42|MSHA_CELFN	D-inositol 3-phosphate glycosyltransferase [Cellulomonas flavigena (strain ATCC 482 / DSM 20109 / NCIB 8073 / NRS 134)]	45	37.78	35	0.27	SOLUBLE	NONE		PredHel=0
38	24	1	JT960545.1_2	223	23777	4	0.81	201	23507.4	8.7	gi|55831356|gb|AAV66577.1|	lipase [Ricinus communis].	192	44.27	168	7e-46	AT3G14360.1	alpha/beta-Hydrolases superfamily protein	193	39.38	130	4e-35	sp|A7MP70|DAPA_CROS8	4-hydroxy-tetrahydrodipicolinate synthase [Cronobacter sakazakii (strain ATCC BAA-894)]	37	32.43	32.3	2.2	MEMBRANE	2	REGION 48-70,73-95	PredHel=2
39	25	1	JT954366.1_3	219	18397	5	2.79	172	18180.7	9.33	gi|167599641|gb|ABZ88806.1|	cyclophilin [Hevea brasiliensis].	172	100	353	2e-122	AT2G16600.1	rotamase CYP 3	170	85.29	308	2e-107	sp|Q39613|CYPH_CATRO	Peptidyl-prolyl cis-trans isomerase [Catharanthus roseus]	172	90.7	326	3e-113	SOLUBLE	NONE		PredHel=0
40	26	1	JT946133.1_c3	213	24347	4	0.79	216	24019.8	4.27	gi|255542728|ref|XP_002512427.1|	Rubber elongation factor protein, putative [Ricinus communis].	231	50.65	204	4e-62	AT3G05500.1	Rubber elongation factor protein (REF)	217	43.78	161	3e-48	sp|O82803|SRPP_HEVBR	Small rubber particle protein [Hevea brasiliensis]	205	49.76	182	1e-55	SOLUBLE	NONE		PredHel=0
41	27	1	JT939205.1_c1	211	27055	6	1.2	243	26957.6	6.8	gi|255542728|ref|XP_002512427.1|	Rubber elongation factor protein, putative [Ricinus communis].	240	84.58	413	9e-144	AT3G05500.1	Rubber elongation factor protein (REF)	227	69.16	318	6e-109	sp|Q9MA63|Y3550_ARATH	REF/SRPP-like protein At3g05500 [Arabidopsis thaliana]	227	69.16	318	9e-108	SOLUBLE	NONE		PredHel=0
42	28	1	JT933643.1_c2	204	40768	6	0.85	345	40452.3	6.92	gi|255547988|ref|XP_002515051.1|	conserved hypothetical protein [Ricinus communis].	347	74.06	553	0	AT3G01680.1	-	357	42.02	288	4e-90	sp|Q0JIL1|NRX2_ORYSJ	Probable nucleoredoxin 2 [Oryza sativa subsp. japonica]	114	28.07	47.4	0.0001	SOLUBLE	NONE		PredHel=0
43	28	2	JT921591.1_c3	151	81552	6	0.31	712	80918.8	6.62	gi|255547988|ref|XP_002515051.1|	conserved hypothetical protein [Ricinus communis].	714	78.85	1170	0	AT3G01680.1	-	709	43.44	599	0	sp|Q0JIL1|NRX2_ORYSJ	Probable nucleoredoxin 2 [Oryza sativa subsp. japonica]	89	33.71	55.1	1e-06	SOLUBLE	NONE		PredHel=0
44	28	3	JT920223.1_c2	137	73027	6	0.35	628	72388.9	6.74	gi|255547988|ref|XP_002515051.1|	conserved hypothetical protein [Ricinus communis].	630	76.83	1023	0	AT3G01680.1	-	644	42.08	528	2e-178	sp|Q0JIL1|NRX2_ORYSJ	Probable nucleoredoxin 2 [Oryza sativa subsp. japonica]	150	26	53.5	3e-06	SOLUBLE	NONE		PredHel=0
45	29	1	JT944240.1_c3	198	24305	5	1.07	218	24206	5.42	gi|255562484|ref|XP_002522248.1|	protein with unknown function [Ricinus communis].	218	99.54	445	5e-157	AT5G45750.1	RAB GTPase homolog A1C	218	87.16	394	1e-139	sp|Q9FK68|RAA1C_ARATH	Ras-related protein RABA1c [Arabidopsis thaliana]	218	87.16	394	2e-138	SOLUBLE	NONE		PredHel=0
46	29	2	JT948813.1_3	189	22056	5	1.22	201	21955.7	6.53	gi|224113085|ref|XP_002316386.1|	predicted protein [Populus trichocarpa].	199	93.47	393	5e-137	AT3G54840.1	Ras-related small GTP-binding family protein	202	88.61	368	3e-130	sp|Q9CB01|RABF1_ARATH	Ras-related protein RABF1 [Arabidopsis thaliana]	202	88.61	368	5e-129	SOLUBLE	NONE		PredHel=0
47	29	3	JT945020.1_1	177	18166	4	1.16	168	18063.3	7.51	gi|255577452|ref|XP_002529605.1|	protein with unknown function [Ricinus communis].	164	92.07	312	2e-105	AT3G54840.2	Ras-related small GTP-binding family protein	166	87.35	293	3e-101	sp|Q9CB01|RABF1_ARATH	Ras-related protein RABF1 [Arabidopsis thaliana]	166	87.35	293	8e-100	SOLUBLE	NONE		PredHel=0
48	29	4	JT945065.1_1	140	21871	3	0.62	200	21770.6	7.25	gi|449455421|ref|XP_004145451.1|	PREDICTED: ras-related protein RABF2b-like [Cucumis sativus].	200	94	391	2e-136	AT5G45130.1	RAB homolog 1	200	88	369	1e-130	sp|P31582|RAF2A_ARATH	Ras-related protein RABF2a [Arabidopsis thaliana]	200	88	369	2e-129	SOLUBLE	NONE		PredHel=0
49	29	5	JT950302.1_1	119	24028	4	0.8	215	23871.7	6.54	gi|255570960|ref|XP_002526431.1|	protein with unknown function [Ricinus communis].	215	96.28	429	8e-151	AT1G09630.1	RAB GTPase 11C	217	91.24	402	4e-143	sp|O04486|RAA2A_ARATH	Ras-related protein RABA2a [Arabidopsis thaliana]	217	91.24	402	5e-142	SOLUBLE	NONE		PredHel=0
50	30	1	JT965474.1_c3	178	12782	4	1.94	110	12789.6	10.01	gi|224078982|ref|XP_002305706.1|	predicted protein [Populus trichocarpa].	109	85.32	195	1e-61	AT5G46230.1	Protein of unknown function, DUF538	105	64.76	159	3e-50	sp|B1NWJ3|YCF2_MANES	Protein ycf2 [Manihot esculenta]	40	40	32.7	0.48	SOLUBLE	NONE		PredHel=0
51	31	1	JT965117.1_c1	177	13973	2	0.64	130	13924.2	10.01	gi|224094027|ref|XP_002310063.1|	predicted protein [Populus trichocarpa].	88	46.59	35	5.4							sp|Q04833|LRP_CAEEL	Low-density lipoprotein receptor-related protein [Caenorhabditis elegans]	122	28.69	36.6	0.032	SOLUBLE	NONE		PredHel=0
52	32	1	JT968048.1_c1	167	11739	4	4.73	104	11746.3	4.51	gi|356505647|ref|XP_003521601.1|	PREDICTED: long chain acyl-CoA synthetase 1-like [Glycine max].	104	88.46	200	1e-58	AT2G47240.2	AMP-dependent synthetase and ligase family protein	104	84.62	189	3e-57	sp|O22898|LACS1_ARATH	Long chain acyl-CoA synthetase 1 [Arabidopsis thaliana]	104	84.62	189	4e-56	SOLUBLE	NONE		PredHel=0
53	33	1	JT928140.1_c2	160	41003	4	0.55	363	40629.4	7.7	gi|255569305|ref|XP_002525620.1|	alpha-1,3-mannosyltransferase, putative [Ricinus communis].	408	75.25	625	0	AT1G78800.1	UDP-Glycosyltransferase superfamily protein	409	66.75	546	0	sp|Q7KWM5|ALG2_DICDI	Alpha-1,3/1,6-mannosyltransferase ALG2 [Dictyostelium discoideum]	411	42.34	319	4e-104	SOLUBLE	NONE		PredHel=0
54	34	1	JT945042.1_c1	158	23417	1	0.35	215	22974.9	5.6	gi|255547343|ref|XP_002514729.1|	RING-H2 finger protein ATL1Q, putative [Ricinus communis].	215	81.86	340	5e-116	AT1G74410.1	RING/U-box superfamily protein	204	66.18	264	2e-88	sp|Q8LBA0|NIPL2_ARATH	NEP1-interacting protein-like 2 [Arabidopsis thaliana]	204	66.18	264	2e-87	SOLUBLE	NONE		PredHel=1
55	35	1	JT940444.1_c1	157	36048	5	0.81	322	36012.4	4.64	gi|224095302|ref|XP_002310373.1|	predicted protein [Populus trichocarpa].	304	80.59	493	1e-172	AT2G44060.2	Late embryogenesis abundant protein, group 2	295	74.92	451	5e-159	sp|P46519|LEA14_SOYBN	Desiccation protectant protein Lea14 homolog [Glycine]	137	29.93	79.7	9e-17	SOLUBLE	NONE		PredHel=0
56	35	2	JT935349.1_c1	126	35863	4	0.65	322	35828.1	6.14	gi|224095302|ref|XP_002310373.1|	predicted protein [Populus trichocarpa].	311	74.28	459	1e-159	AT2G44060.2	Late embryogenesis abundant protein, group 2	301	67.11	409	2e-142	sp|P46519|LEA14_SOYBN	Desiccation protectant protein Lea14 homolog [Glycine]	129	31.01	77.4	6e-16	SOLUBLE	NONE		PredHel=1
57	36	1	JT942256.1_3	141	23154	2	0.36	208	22312.8	6.31	gi|37954952|gb|AAO63574.1|	HEV2.2 [Hevea brasiliensis].	204	100	421	6e-148	AT3G04720.1	pathogenesis-related 4	209	62.2	244	4e-81	sp|P02877|HEVE_HEVBR	Pro-hevein [Hevea brasiliensis]	204	99.02	417	4e-148	MEMBRANE	1	REGION 3-25	PredHel=0
58	37	1	JT918183.1_3	135	104855	3	0.11	924	103836	9.29	gi|255570639|ref|XP_002526275.1|	eukaryotic translation initiation factor 2c, putative [Ricinus	909	95.49	1783	0	AT1G48410.1	Stabilizer of iron transporter SufD / Polynucleotidyl transferase	912	85.31	1621	0	sp|O04379|AGO1_ARATH	Protein argonaute 1 [Arabidopsis thaliana]	912	85.31	1621	0	SOLUBLE	NONE		PredHel=0
59	38	1	JT942264.1_c1	133	25638	3	0.51	230	25540.2	9.43	gi|255547720|ref|XP_002514917.1|	Small rubber particle protein, putative [Ricinus communis].	229	75.55	327	3e-110	AT1G67360.1	Rubber elongation factor protein (REF)	233	57.08	258	1e-85	sp|Q9FYF7|Y1736_ARATH	REF/SRPP-like protein At1g67360 [Arabidopsis thaliana]	233	57.08	258	1e-84	SOLUBLE	NONE		PredHel=0
60	39	1	JT933735.1_c1	128	25104	2	0.33	225	25005.1	6.95	gi|255544246|ref|XP_002513185.1|	protein with unknown function [Ricinus communis].	225	89.78	426	2e-149	AT5G47960.1	RAB GTPase homolog A4C	225	79.56	377	1e-132	sp|Q9FE79|RAA4C_ARATH	Ras-related protein RABA4c [Arabidopsis thaliana]	225	79.56	377	1e-131	SOLUBLE	NONE		PredHel=0
61	40	1	JT920502.1_3	128	77111	4	0.21	697	76531.4	7.69	gi|255545494|ref|XP_002513807.1|	long-chain-fatty-acid CoA ligase, putative [Ricinus communis].	697	86.94	1245	0	AT1G77590.1	long chain acyl-CoA synthetase 9	695	75.68	1115	0	sp|Q9CAP8|LACS9_ARATH	Long chain acyl-CoA synthetase 9, chloroplastic [Arabidopsis thaliana]	695	75.68	1115	0	MEMBRANE	1	REGION 1-21	PredHel=0
62	41	1	JT948104.1_c1	124	20838	3	0.66	184	20622.8	8.93	gi|255583323|ref|XP_002532424.1|	ADP-ribosylation factor, putative [Ricinus communis].	184	96.2	370	2e-128	AT3G49870.1	ADP-ribosylation factor-like A1C	184	91.3	348	6e-123	sp|Q5ZKQ8|ARL8A_CHICK	ADP-ribosylation factor-like protein 8A [Gallus gallus]	183	63.93	268	6e-90	SOLUBLE	NONE		PredHel=0
63	42	1	JT949986.1_c2	120	21143	5	1.31	181	21042.3	8.66	gi|255560623|ref|XP_002521325.1|	abhydrolase domain containing, putative [Ricinus communis].	180	60.56	235	9e-74	AT1G17430.1	alpha/beta-Hydrolases superfamily protein	186	45.7	153	1e-44	sp|Q9BV23|ABHD6_HUMAN	Monoacylglycerol lipase ABHD6 [Homo sapiens]	185	25.95	47.4	2e-05	SOLUBLE	NONE		PredHel=0
64	43	1	JT920030.1_3	120	80960	7	0.37	707	80269.2	8.91	gi|255565533|ref|XP_002523757.1|	eukaryotic translation initiation factor 2c, putative [Ricinus	706	75.21	1126	0	AT2G27880.1	Argonaute family protein	713	61.15	902	0	sp|Q9SJK3|AGO5_ARATH	Protein argonaute 5 [Arabidopsis thaliana]	713	61.15	902	0	SOLUBLE	NONE		PredHel=0
65	44	1	JT942882.1_2	120	20752	1	0.4	181	20707.6	6.96	gi|353441154|gb|AEQ94161.1|	ADP-ribosylation factor [Elaeis guineensis].	181	100	375	7e-131	AT1G10630.1	ADP-ribosylation factor A1F	181	97.79	370	1e-131	sp|P51823|ARF2_ORYSJ	ADP-ribosylation factor 2 [Oryza sativa subsp. japonica]	181	98.9	374	9e-132	SOLUBLE	NONE		PredHel=0
66	45	1	JT945335.1_c1	118	18336	2	0.78	162	18346.6	6.29	gi|255579096|ref|XP_002530396.1|	heat-shock protein, putative [Ricinus communis].	162	90.74	281	3e-94	AT1G53540.1	HSP20-like chaperones superfamily protein	162	72.84	236	3e-79	sp|P05478|HSP16_SOYBN	18.5 kDa class I heat shock protein [Glycine max]	162	80.25	260	1e-87	SOLUBLE	NONE		PredHel=0
67	46	1	JT916348.1_c3	116	52650	4	0.32	460	52510.7	9.04	gi|255572477|ref|XP_002527173.1|	conserved hypothetical protein [Ricinus communis].	433	80.6	686	0	AT5G52580.1	RabGAP/TBC domain-containing protein	465	65.81	603	0	sp|Q8TC07|TBC15_HUMAN	TBC1 domain family member 15 [Homo sapiens]	142	49.3	150	5e-38	MEMBRANE	1	REGION 95-117	PredHel=1
68	47	1	JT936371.1_1	109	45194	3	0.27	400	44993.9	9.66	gi|449469911|ref|XP_004152662.1|	PREDICTED: abhydrolase domain-containing protein 4-like [Cucumis	397	79.85	670	0	AT4G24160.1	alpha/beta-Hydrolases superfamily protein	368	76.36	604	0	sp|O14249|CLD1_SCHPO	probable cardiolipin-specific deacylase, mitochondrial [Schizosaccharomyces pombe (strain 972 / ATCC 24843)]	341	30.79	153	3e-40	SOLUBLE	NONE		PredHel=0
69	48	1	JT968387.1_c1	106	18017	3	0.79	161	17800.3	7.13	gi|255548375|ref|XP_002515244.1|	long-chain-fatty-acid CoA ligase, putative [Ricinus communis].	161	82.61	297	2e-94	AT2G47240.2	AMP-dependent synthetase and ligase family protein	160	70	253	2e-80	sp|O22898|LACS1_ARATH	Long chain acyl-CoA synthetase 1 [Arabidopsis thaliana]	160	70	253	3e-79	SOLUBLE	NONE		PredHel=0
70	49	1	JT964269.1_c1	105	19956	2	0.42	174	19797.5	4.78	gi|356534712|ref|XP_003535896.1|	PREDICTED: long chain acyl-CoA synthetase 1-like [Glycine max].	174	78.16	294	5e-93	AT2G47240.2	AMP-dependent synthetase and ligase family protein	174	68.39	252	1e-79	sp|O22898|LACS1_ARATH	Long chain acyl-CoA synthetase 1 [Arabidopsis thaliana]	174	68.39	252	2e-78	SOLUBLE	NONE		PredHel=0
71	50	1	JT918520.1_c2	103	92529	4	0.17	808	92016.7	5.9	gi|255553165|ref|XP_002517625.1|	phopholipase d alpha, putative [Ricinus communis].	808	89.23	1543	0	AT1G52570.1	phospholipase D alpha 2	810	80.86	1406	0	sp|Q41142|PLDA1_RICCO	Phospholipase D alpha 1 [Ricinus communis]	808	88.99	1538	0	SOLUBLE	NONE		PredHel=0
72	51	1	JT920291.1_2	96	87292	2	0.09	757	86149.8	6.54	gi|122210890|sp|Q2XPU6.1|CAS1_RICCO	RecName: Full=Cycloartenol synthase; Short=RcCAS.	759	86.96	1412	0	AT2G07050.1	cycloartenol synthase 1	754	81.7	1333	0	sp|Q2XPU6|CAS1_RICCO	Cycloartenol synthase [Ricinus]	759	86.96	1412	0	SOLUBLE	NONE		PredHel=0
73	52	1	JT919744.1_c2	96	68017	2	0.11	614	67659.5	6.88	gi|255564966|ref|XP_002523476.1|	ligatin, putative [Ricinus communis].	617	84.44	1068	0	AT1G71350.1	eukaryotic translation initiation factor SUI1 family protein	615	66.83	827	0	sp|Q5PPG7|EIF2D_RAT	Eukaryotic translation initiation factor 2D [Rattus norvegicus]	623	31.46	256	7e-75	SOLUBLE	NONE		PredHel=0
74	53	1	JT938614.1_2	95	23702	2	0.35	209	23374.5	5.43	gi|224093425|ref|XP_002309918.1|	predicted protein [Populus trichocarpa].	209	93.3	405	1e-141	AT1G43890.3	RAB GTPASE HOMOLOG B18	200	88	366	5e-129	sp|O23657|RABC1_ARATH	Ras-related protein RABC1 [Arabidopsis thaliana]	200	88	366	6e-128	SOLUBLE	NONE		PredHel=0
75	54	1	JT946100.1_c2	93	21378	1	0.18	187	21391.4	10.29	gi|255574399|ref|XP_002528113.1|	conserved hypothetical protein [Ricinus communis].	187	72.19	244	8e-78	AT3G51890.1	Clathrin light chain protein	153	71.9	208	1e-66	sp|F4J5M9|CLC3_ARATH	Clathrin light chain 3 [Arabidopsis thaliana]	153	71.9	208	1e-65	SOLUBLE	NONE		PredHel=0
76	55	1	JT935611.1_2	91	34585	4	0.51	329	34492.8	9.59	gi|462397211|gb|EMJ03010.1|	hypothetical protein PRUPE_ppa008401mg [Prunus persica].	329	84.8	574	0	AT4G13010.1	Oxidoreductase, zinc-binding dehydrogenase family protein	329	81.76	545	0	sp|Q9SV68|QORH_ARATH	Putative quinone-oxidoreductase homolog, chloroplastic [Arabidopsis thaliana]	329	81.76	545	0	SOLUBLE	NONE		PredHel=0
77	56	1	JT954184.1_2	87	16340	1	0.24	150	16292.6	11.16	gi|255557317|ref|XP_002519689.1|	40S ribosomal protein S14, putative [Ricinus communis].	150	98.67	302	6e-103	AT3G52580.1	Ribosomal protein S11 family protein	139	93.53	271	9e-94	sp|P42036|RS143_ARATH	40S ribosomal protein S14-3 [Arabidopsis thaliana]	139	93.53	271	1e-92	SOLUBLE	NONE		PredHel=0
78	57	1	JT924463.1_3	81	58144	1	0.06	527	57780.9	6.95	gi|225449659|ref|XP_002263319.1|	PREDICTED: pyruvate kinase, cytosolic isozyme-like [Vitis	527	88.24	986	0	AT3G52990.1	Pyruvate kinase family protein	527	84.63	951	0	sp|Q42806|KPYC_SOYBN	Pyruvate kinase, cytosolic isozyme [Glycine]	496	43.95	399	1e-131	SOLUBLE	NONE		PredHel=0
79	58	1	JT928738.1_1	81	37240	2	0.21	339	37149.3	7.77	gi|255540341|ref|XP_002511235.1|	glyceraldehyde 3-phosphate dehydrogenase, putative [Ricinus	339	92.04	647	0	AT3G04120.1	glyceraldehyde-3-phosphate dehydrogenase C subunit 1	334	88.62	621	0	sp|P25861|G3PC_ANTMA	Glyceraldehyde-3-phosphate dehydrogenase, cytosolic [Antirrhinum majus]	333	91.89	633	0	SOLUBLE	NONE		PredHel=0
80	59	1	JT946910.1_c1	80	34977	1	0.11	316	33972.9	7.61	gi|224080749|ref|XP_002306220.1|	predicted protein [Populus trichocarpa].	301	85.38	530	0	AT3G12500.1	basic chitinase	300	73	456	1e-160	sp|P06215|CHIT_PHAVU	Endochitinase [Phaseolus]	322	73.91	506	1e-179	MEMBRANE	1	REGION 5-27	PredHel=0
81	60	1	JT918758.1_c3	79	39707	1	0.09	352	39219	6.37	gi|170676820|gb|ACB30545.1|	long-chain acyl-CoA synthetase 4 [Ricinus communis].	350	89.43	660	0	AT4G23850.1	AMP-dependent synthetase and ligase family protein	350	77.14	585	0	sp|Q9T0A0|LACS4_ARATH	Long chain acyl-CoA synthetase 4 [Arabidopsis thaliana]	350	77.14	585	0	SOLUBLE	NONE		PredHel=0
82	61	1	JT932779.1_c1	75	41021	1	0.09	367	40932.6	4.72	gi|356548123|ref|XP_003542453.1|	PREDICTED: 26S proteasome regulatory subunit 4 homolog A-like	367	99.46	736	0	AT4G29040.1	regulatory particle AAA-ATPase 2A	367	97.55	726	0	sp|Q9SZD4|PRS4A_ARATH	26S proteasome regulatory subunit 4 homolog A [Arabidopsis thaliana]	367	97.55	726	0	SOLUBLE	NONE		PredHel=0
83	62	1	JT914648.1_c1	73	174610	1	0.02	1516	173007	8.42	gi|255550191|ref|XP_002516146.1|	myosin XI, putative [Ricinus communis].	1515	89.5	2803	0	AT4G33200.1	myosin, putative	1513	76.47	2383	0	sp|P54697|MYOJ_DICDI	Myosin-J heavy chain [Dictyostelium discoideum]	1161	39.79	759	0	SOLUBLE	NONE		PredHel=0
84	63	1	JT925528.1_1	70	57791	1	0.06	527	57370.7	7.04	gi|224069760|ref|XP_002326407.1|	predicted protein [Populus trichocarpa].	527	94.31	1027	0	AT3G52990.1	Pyruvate kinase family protein	527	91.08	1002	0	sp|Q42806|KPYC_SOYBN	Pyruvate kinase, cytosolic isozyme [Glycine]	495	44.24	394	2e-129	SOLUBLE	NONE		PredHel=0
85	64	1	JT939513.1_1	69	13177	1	0.3	117	13070.7	10.42	gi|255577267|ref|XP_002529515.1|	hypothetical protein RCOM_1715180 [Ricinus communis].	103	67.96	132	2e-37	AT1G53670.2	methionine sulfoxide reductase B 1	91	51.65	84.3	1e-20	sp|Q9C8M2|MSRB1_ARATH	Peptide methionine sulfoxide reductase B1, chloroplastic [Arabidopsis thaliana]	91	51.65	84.3	2e-19	SOLUBLE	NONE		PredHel=0
86	65	1	JT918818.1_2	66	94855	2	0.08	868	94627.1	9.45	gi|225465253|ref|XP_002268311.1|	PREDICTED: dynamin-2B [Vitis vinifera].	871	84.85	1482	0	AT1G59610.1	dynamin-like 3	875	81.14	1375	0	sp|Q9LQ55|DRP2B_ARATH	Dynamin-2B [Arabidopsis thaliana]	875	81.14	1375	0	SOLUBLE	NONE		PredHel=0
87	66	1	JT922608.1_2	66	54393	1	0.07	476	53800.2	7.89	gi|224121616|ref|XP_002330745.1|	predicted protein [Populus trichocarpa].	472	85.59	838	0	AT1G16570.1	UDP-Glycosyltransferase superfamily protein	470	71.28	665	0	sp|Q921Q3|ALG1_MOUSE	Chitobiosyldiphosphodolichol beta-mannosyltransferase [Mus musculus]	478	42.89	352	1e-114	MEMBRANE	2	REGION 79-101,116-138	PredHel=0
88	67	1	JT962900.1_c2	65	10313	3	1.68	92	10319.6	6.87	gi|330318654|gb|AEC10987.1|	acyl-CoA-binding protein [Camellia sinensis].	90	90	172	1e-53	AT1G31812.1	acyl-CoA-binding protein 6	91	75.82	142	2e-44	sp|O04066|ACBP_RICCO	Acyl-CoA-binding protein [Ricinus]	90	91.11	171	1e-54	SOLUBLE	NONE		PredHel=0
89	68	1	JT922578.1_1	63	69198	2	0.11	614	68955	7.65	gi|255571115|ref|XP_002526508.1|	dynamin, putative [Ricinus communis].	618	95.15	1193	0	AT3G60190.1	DYNAMIN-like 1E	624	83.65	1106	0	sp|Q9FNX5|DRP1E_ARATH	Dynamin-related protein 1E [Arabidopsis thaliana]	624	83.65	1106	0	SOLUBLE	NONE		PredHel=0
90	68	2	JT919755.1_c2	52	35841	2	0.22	312	35748.4	9.8	gi|359489239|ref|XP_002265553.2|	PREDICTED: dynamin-related protein 1E isoform 2 [Vitis vinifera].	262	90.08	492	2e-168	AT3G60190.1	DYNAMIN-like 1E	265	76.6	434	3e-148	sp|Q9FNX5|DRP1E_ARATH	Dynamin-related protein 1E [Arabidopsis thaliana]	265	76.6	434	4e-147	SOLUBLE	NONE		PredHel=0
91	69	1	JT929990.1_c1	61	46784	2	0.17	413	46299.8	8.14	gi|224128201|ref|XP_002329106.1|	predicted protein [Populus trichocarpa].	419	81.86	711	0	AT1G52920.1	G protein coupled receptor	413	71.19	614	0	sp|Q9JJK2|LANC2_MOUSE	LanC-like protein 2 [Mus musculus]	442	39.14	282	1e-88	SOLUBLE	NONE		PredHel=0
92	70	1	JT932528.1_c1	59	36099	1	0.1	326	36007.7	10.08	gi|255584329|ref|XP_002532900.1|	conserved hypothetical protein [Ricinus communis].	326	85.58	586	0	AT5G39410.1	Saccharopine dehydrogenase	321	70.09	464	6e-162	sp|Q8LGI2|SCPDL_ARATH	Probable mitochondrial saccharopine dehydrogenase-like oxidoreductase At5g39410 [Arabidopsis thaliana]	321	70.09	464	8e-161	SOLUBLE	NONE		PredHel=1
93	71	1	JT931129.1_3	57	49697	3	0.24	449	49385.8	9.66	gi|6015058|sp|O49169.1|EF1A_MANES	RecName: Full=Elongation factor 1-alpha; Short=EF-1-alpha.	449	99.11	917	0	AT5G60390.3	GTP binding Elongation factor Tu family protein	449	95.32	888	0	sp|O49169|EF1A_MANES	Elongation factor 1-alpha [Manihot esculenta]	449	99.11	917	0	SOLUBLE	NONE		PredHel=0
94	72	1	JT948536.1_c2	55	22740	1	0.17	199	22525.4	7.95	gi|47681462|gb|AAT37501.1|	putative SNARE protein [Hevea brasiliensis].	199	99.5	414	1e-145	AT5G58060.1	SNARE-like superfamily protein	199	87.94	372	8e-132	sp|Q9ZRD6|YKT61_ARATH	VAMP-like protein YKT61 [Arabidopsis thaliana]	199	87.94	372	1e-130	SOLUBLE	NONE		PredHel=0
95	73	1	JT918804.1_c1	54	82832	1	0.04	756	82084.7	5.14	gi|255540511|ref|XP_002511320.1|	zinc ion binding protein, putative [Ricinus communis].	763	65.14	879	0	AT4G24690.1	ubiquitin-associated (UBA)/TS-N domain-containing protein / octicosapeptide/Phox/Bemp1 (PB1) domain-containing protein	778	43.83	551	0	sp|Q5BL31|CF106_DANRE	Uncharacterized protein C6orf106 homolog [Danio rerio]	154	29.22	86.7	3e-17	SOLUBLE	NONE		PredHel=0
96	74	1	JT930507.1_c1	53	54507	1	0.07	490	54027.6	5.36	gi|255567389|ref|XP_002524674.1|	Sphingosine kinase, putative [Ricinus communis].	486	83.54	846	0	AT4G21540.1	sphingosine kinase 1	480	65.62	657	0	sp|Q9NYA1|SPHK1_HUMAN	Sphingosine kinase 1 [Homo sapiens]	356	32.02	171	1e-46	SOLUBLE	NONE		PredHel=0
97	75	1	JT914456.1_c2	52	194165	1	0.02	1705	193146	5.08	gi|255574808|ref|XP_002528311.1|	clathrin heavy chain, putative [Ricinus communis].	1657	97.77	3337	0	AT3G11130.1	Clathrin, heavy chain	1657	93.9	3253	0	sp|Q0WNJ6|CLAH1_ARATH	Clathrin heavy chain 1 [Arabidopsis thaliana]	1657	93.9	3253	0	MEMBRANE	2	REGION 1-23,280-302	PredHel=0
98	76	1	JT941244.1_c3	51	21863	1	0.18	193	21763.2	8.66	gi|255557975|ref|XP_002520016.1|	ADP-ribosylation factor, arf, putative [Ricinus communis].	193	97.93	396	1e-138	AT5G17060.1	ADP-ribosylation factor B1B	191	91.1	370	5e-131	sp|P91924|ARF_DUGJA	ADP-ribosylation factor [Dugesia]	178	62.36	251	2e-83	SOLUBLE	NONE		PredHel=0
99	77	1	JT921291.1_1	49	68488	1	0.05	610	68187.5	7.9	gi|255537813|ref|XP_002509973.1|	dynamin, putative [Ricinus communis].	610	96.72	1222	0	AT5G42080.1	dynamin-like protein	610	88.69	1142	0	sp|Q39828|SDL5A_SOYBN	Dynamin-related protein 5A [Glycine]	610	90.82	1163	0	SOLUBLE	NONE		PredHel=0
100	78	1	JT918921.1_c1	49	81080	1	0.05	733	80332.1	8.57	gi|255582880|ref|XP_002532212.1|	long-chain-fatty-acid CoA ligase, putative [Ricinus communis].	736	83.15	1270	0	AT2G04350.2	AMP-dependent synthetase and ligase family protein	679	74.96	1080	0	sp|Q9SJD4|LACS8_ARATH	Long chain acyl-CoA synthetase 8 [Arabidopsis thaliana]	679	74.96	1080	0	MEMBRANE	3	REGION 33-54,302-324,337-359	PredHel=1
101	79	1	JT948689.1_c1	49	20987	1	0.18	187	20942.6	11.85	gi|255564218|ref|XP_002523106.1|	60S ribosomal protein L18, putative [Ricinus communis].	187	96.26	367	2e-127	AT3G05590.1	ribosomal protein L18	187	86.63	336	4e-118	sp|P42791|RL182_ARATH	60S ribosomal protein L18-2 [Arabidopsis thaliana]	187	86.63	336	6e-117	SOLUBLE	NONE		PredHel=0
102	80	1	JT940960.1_c3	49	20094	1	0.19	175	19935.6	4.61	gi|379048253|gb|AFC88294.1|	calcineurin-like protein [Hevea brasiliensis].	175	98.86	354	1e-122	AT3G18430.2	Calcium-binding EF-hand family protein	175	84	302	8e-105	sp|P42322|CANB1_NAEGR	Calcineurin subunit B [Naegleria gruberi]	168	38.69	124	3e-34	SOLUBLE	NONE		PredHel=0
103	81	1	JT928471.1_c3	46	58054	1	0.06	514	57634.1	9.59	gi|224090935|ref|XP_002309122.1|	predicted protein, partial [Populus trichocarpa].	433	90.76	825	0	AT5G01220.1	sulfoquinovosyldiacylglycerol 2	486	75.51	749	0	sp|Q8NT41|MGTA_CORGL	GDP-mannose-dependent alpha-mannosyltransferase [Corynebacterium glutamicum (strain ATCC 13032 / DSM 20300 / JCM 1318 / LMG 3730 / NCIMB 10025)]	377	32.1	165	5e-44	MEMBRANE	1	REGION 199-221	PredHel=0
104	82	1	JT955224.1_3	46	18218	1	0.21	159	17944.5	4.59	gi|224101877|ref|XP_002312456.1|	predicted protein [Populus trichocarpa].	159	93.08	314	2e-107	AT1G23260.1	MMS ZWEI homologue 1	159	80.5	273	3e-94	sp|Q93YP0|UEV1A_ARATH	Ubiquitin-conjugating enzyme E2 variant 1A [Arabidopsis thaliana]	159	80.5	273	4e-93	SOLUBLE	NONE		PredHel=0
105	83	1	JT963368.1_c1	44	17523	1	0.22	157	17533.5	5.21	gi|224142681|ref|XP_002324683.1|	predicted protein [Populus trichocarpa].	158	67.09	203	6e-64	AT1G07400.1	HSP20-like chaperones superfamily protein	162	41.36	114	8e-32	sp|P05478|HSP16_SOYBN	18.5 kDa class I heat shock protein [Glycine max]	144	47.92	133	4e-38	SOLUBLE	NONE		PredHel=0
106	84	1	JT938754.1_3	43	35322	3	0.36	322	35115.6	9.08	gi|255566744|ref|XP_002524356.1|	short-chain dehydrogenase, putative [Ricinus communis].	322	84.47	575	0	AT4G09750.1	NAD(P)-binding Rossmann-fold superfamily protein	321	80.69	558	0	sp|A6QP05|DHR12_BOVIN	Dehydrogenase/reductase SDR family member 12 [Bos taurus]	299	46.82	262	1e-83	SOLUBLE	NONE		PredHel=0
107	85	1	JT922944.1_c2	43	61576	1	0.06	554	61271.5	6.8	gi|211906504|gb|ACJ11745.1|	heat shock protein 70 [Gossypium hirsutum].	545	96.88	1087	0	AT3G12580.1	heat shock protein 70	542	94.46	1065	0	sp|P09189|HSP7C_PETHY	Heat shock cognate 70 kDa protein [Petunia hybrida]	545	95.23	1070	0	SOLUBLE	NONE		PredHel=0
108	86	1	JT944943.1_3	43	24986	2	0.33	225	24830.2	8.45	gi|462401488|gb|EMJ07045.1|	hypothetical protein PRUPE_ppa011070mg [Prunus persica].	225	91.11	432	8e-152	AT5G65270.1	RAB GTPase homolog A4A	224	86.61	406	2e-144	sp|Q40522|RB11D_TOBAC	Ras-related protein Rab11D [Nicotiana tabacum]	224	88.84	414	3e-146	SOLUBLE	NONE		PredHel=0
109	87	1	JT955813.1_3	42	13914	1	0.28	124	13809	10.34	gi|255539715|ref|XP_002510922.1|	40S ribosomal protein S20, putative [Ricinus communis].	124	97.58	248	2e-82	AT5G62300.2	Ribosomal protein S10p/S20e family protein	124	91.94	231	9e-79	sp|P49200|RS201_ARATH	40S ribosomal protein S20-1 [Arabidopsis thaliana]	124	91.94	231	1e-77	SOLUBLE	NONE		PredHel=0
110	88	1	JT956472.1_2	42	18436	1	0.21	162	18447.7	6.3	gi|255579096|ref|XP_002530396.1|	heat-shock protein, putative [Ricinus communis].	162	90.12	285	8e-96	AT1G53540.1	HSP20-like chaperones superfamily protein	162	71.6	236	3e-79	sp|P05478|HSP16_SOYBN	18.5 kDa class I heat shock protein [Glycine max]	162	80.86	267	1e-90	SOLUBLE	NONE		PredHel=0
111	89	1	JT929066.1_3	41	50535	1	0.07	438	50395.7	6.88	gi|255555963|ref|XP_002519016.1|	Polyphenol oxidase, chloroplast precursor, putative [Ricinus	441	80.05	685	0	AT1G16400.1	cytochrome P450, family 79, subfamily F, polypeptide 2	105	26.67	32.3	0.66	sp|P43309|PPO_MALDO	Polyphenol oxidase, chloroplastic [Malus]	439	69.93	641	0	SOLUBLE	NONE		PredHel=0
112	90	1	JT952515.1_2	40	17266	2	0.5	153	17219.7	7.51	gi|225461646|ref|XP_002285421.1|	PREDICTED: ubiquitin-conjugating enzyme E2 35 isoform 1 [Vitis	153	100	315	6e-108	AT1G78870.2	ubiquitin-conjugating enzyme 35	153	98.69	312	1e-109	sp|Q94A97|UBC35_ARATH	Ubiquitin-conjugating enzyme E2 35 [Arabidopsis thaliana]	153	98.69	312	1e-108	SOLUBLE	NONE		PredHel=0
113	91	1	JT948404.1_1	38	26624	1	0.14	229	26639.2	10.34	gi|224110146|ref|XP_002315427.1|	predicted protein [Populus trichocarpa].	230	78.26	315	2e-105	AT3G52220.1	-	224	64.29	273	1e-91	sp|Q99LX5|MMTA2_MOUSE	Multiple myeloma tumor-associated protein 2 homolog [Mus musculus]	110	47.27	108	9e-27	SOLUBLE	NONE		PredHel=0
114	92	1	JT938456.1_2	37	34750	1	0.11	324	34714.8	7.16	gi|296087606|emb|CBI34862.3|	unnamed protein product, partial [Vitis vinifera].	267	75.66	370	6e-125	AT5G40490.1	RNA-binding (RRM/RBD/RNP motifs) family protein	200	78.5	322	1e-106	sp|Q8W034|RNP1_ARATH	Heterogeneous nuclear ribonucleoprotein 1 [Arabidopsis thaliana]	187	44.39	174	9e-49	SOLUBLE	NONE		PredHel=0
115	93	1	JT925995.1_2	37	46431	1	0.08	417	45946	4.79	gi|305387431|gb|ADM52185.1|	type II metacaspase [Hevea brasiliensis].	417	100	853	0	AT1G79340.1	metacaspase 4	425	66.82	578	0	sp|O64517|MCA4_ARATH	Metacaspase-4 [Arabidopsis thaliana]	425	66.82	578	0	SOLUBLE	NONE		PredHel=0
116	94	1	JT919498.1_c3	36	74559	1	0.05	649	74318.7	7.61	gi|255575774|ref|XP_002528786.1|	Zuotin, putative [Ricinus communis].	649	86.9	1041	0	AT3G11450.1	DnaJ domain ;Myb-like DNA-binding domain	649	67.64	781	0	sp|Q1RMH9|DNJC2_BOVIN	DnaJ homolog subfamily C member 2 [Bos taurus]	589	37.01	299	4e-90	SOLUBLE	NONE		PredHel=0
117	95	1	JT948023.1_3	36	22683	1	0.17	203	22640.6	7.36	gi|297844728|ref|XP_002890245.1|	SNF7 family protein [Arabidopsis lyrata subsp. lyrata].	203	90.15	380	5e-132	AT1G17730.1	vacuolar protein sorting 46.1	203	89.66	379	3e-134	sp|O96552|CHMP1_DICDI	Charged multivesicular body protein 1 [Dictyostelium discoideum]	194	48.45	194	1e-60	SOLUBLE	NONE		PredHel=0
118	96	1	JT916383.1_c1	36	95794	1	0.04	859	94997.4	7.04	gi|224089078|ref|XP_002308627.1|	predicted protein [Populus trichocarpa].	859	89.76	1608	0	AT2G25730.2	-	860	74.88	1348	0	sp|Q551A3|Y6689_DICDI	Protein DDB_G0276689 [Dictyostelium discoideum]	789	23.57	156	2e-37	SOLUBLE	NONE		PredHel=0
119	97	1	JT934165.1_3	34	33950	1	0.11	315	33856.6	3.89	gi|255558734|ref|XP_002520391.1|	conserved hypothetical protein [Ricinus communis].	311	43.09	142	3e-36	AT1G76780.1	HSP20-like chaperones superfamily protein	85	32.94	29.3	4.8							SOLUBLE	NONE		PredHel=0
120	98	1	JT944400.1_c2	34	18544	1	0.21	167	18270	7.25	gi|255585404|ref|XP_002533397.1|	ARF GTPase activator, putative [Ricinus communis].	167	92.81	316	6e-108	AT5G47710.2	Calcium-dependent lipid-binding (CaLB domain) family protein	162	77.78	270	1e-92	sp|Q8LFN9|AGD13_ARATH	Probable ADP-ribosylation factor GTPase-activating protein AGD13 [Arabidopsis thaliana]	159	45.28	135	8e-37	SOLUBLE	NONE		PredHel=0
121	99	1	JT949571.1_3	32	17703	1	0.22	159	17485.6	5.87	gi|33325131|gb|AAQ08198.1|	eukaryotic translation initiation factor 5A isoform VIII, partial	158	100	327	2e-112	AT1G13950.1	eukaryotic elongation factor 5A-1	159	87.42	287	1e-99	sp|Q9AXJ4|IF5A_MANES	Eukaryotic translation initiation factor 5A [Manihot]	159	94.34	316	8e-110	SOLUBLE	NONE		PredHel=0
122	100	1	JT916142.1_1	28	64578	1	0.06	586	62850.1	7.8	gi|255548920|ref|XP_002515516.1|	grr1, plant, putative [Ricinus communis].	576	83.33	972	0	AT2G25490.1	EIN3-binding F box protein 1	576	59.72	684	0	sp|Q9SKK0|EBF1_ARATH	EIN3-binding F-box protein 1 [Arabidopsis thaliana]	576	59.72	684	0	SOLUBLE	NONE		PredHel=0
123	101	1	JT955341.1_1	27	12776	1	0.31	113	12669.4	9.2	gi|317159559|gb|ADV04054.1|	eukaryotic translation initiation factor 3 [Hevea brasiliensis].	113	100	233	6e-77	AT4G27130.1	Translation initiation factor SUI1 family protein	113	88.5	214	2e-72	sp|P41568|SUI11_ARATH	Protein translation factor SUI1 homolog 1 [Arabidopsis thaliana]	113	88.5	214	3e-71	SOLUBLE	NONE		PredHel=0
124	102	1	JT915583.1_c1	26	130208	1	0.03	1158	129317	4.6	gi|255573523|ref|XP_002527686.1|	ATP binding protein, putative [Ricinus communis].	1102	86.57	1900	0	AT1G73460.1	Protein kinase superfamily protein	1201	63.11	1406	0	sp|Q9NR20|DYRK4_HUMAN	Dual specificity tyrosine-phosphorylation-regulated kinase 4 [Homo sapiens]	328	38.41	222	6e-61	SOLUBLE	NONE		PredHel=0
125	103	1	JT917100.1_3	26	101754	1	0.04	892	100677	7.59	gi|255563673|ref|XP_002522838.1|	pentatricopeptide repeat-containing protein, putative [Ricinus	865	67.05	1120	0	AT4G04790.1	Tetratricopeptide repeat (TPR)-like superfamily protein	772	47.67	700	0	sp|Q6NQ81|PP304_ARATH	Pentatricopeptide repeat-containing protein At4g04790, mitochondrial [Arabidopsis thaliana]	772	47.67	700	0	SOLUBLE	NONE		PredHel=0
126	104	1	JT944359.1_c1	24	15125	1	0.26	132	15020.3	7.5	gi|462419779|gb|EMJ24042.1|	hypothetical protein PRUPE_ppa006689mg [Prunus persica].	132	88.64	251	1e-79	AT1G80950.1	Phospholipid/glycerol acyltransferase family protein	132	72.73	216	4e-69	sp|Q3TFD2|PCAT1_MOUSE	Lysophosphatidylcholine acyltransferase 1 [Mus musculus]	127	43.31	104	1e-25	MEMBRANE	2	REGION 17-39,46-67	PredHel=1
127	105	1	JT919502.1_1	23	68515	1	0.05	625	68214.6	6.96	gi|300834857|gb|ADK37758.1|	delta 1-pyrroline-5-carboxylate synthetase [Jatropha curcas].	622	89.71	1097	0	AT3G55610.2	delta 1-pyrroline-5-carboxylate synthase 2	619	78.35	975	0	sp|O04015|P5CS_ACTDE	Delta-1-pyrroline-5-carboxylate synthase [Actinidia]	620	83.87	1023	0	SOLUBLE	NONE		PredHel=0
128	106	1	JT929875.1_c2	22	27557	1	0.14	247	27346.7	7.96	gi|255580256|ref|XP_002530958.1|	multidrug resistance pump, putative [Ricinus communis].	220	77.27	357	5e-118	AT3G03620.1	MATE efflux family protein	237	49.79	240	3e-75	sp|Q9LYT3|TT12_ARATH	Protein TRANSPARENT TESTA 12 [Arabidopsis thaliana]	226	41.15	180	2e-51	MEMBRANE	6	REGION 24-46,50-72,85-107,127-149,160-182,188-210	PredHel=6
129	107	1	JT938924.1_c3	22	37397	1	0.1	337	37135.5	8.2	gi|255538356|ref|XP_002510243.1|	dihydroflavonal-4-reductase, putative [Ricinus communis].	337	81.9	583	0	AT4G33360.1	NAD(P)-binding Rossmann-fold superfamily protein	337	73.59	531	0	sp|P73212|DFRA_SYNY3	Putative dihydroflavonol-4-reductase [Synechocystis sp. (strain PCC 6803 / Kazusa)]	341	30.79	152	2e-41	SOLUBLE	NONE		PredHel=0
130	108	1	JT932200.1_3	22	51908	1	0.07	468	51825.5	10.93	gi|255539521|ref|XP_002510825.1|	conserved hypothetical protein [Ricinus communis].	478	76.57	626	0	AT5G62070.1	IQ-domain 23	441	47.17	220	7e-66	sp|Q8LPG9|IQD14_ARATH	Protein IQ-DOMAIN 14 [Arabidopsis thaliana]	66	50	73.2	2e-12	SOLUBLE	NONE		PredHel=0
131	109	1	JT916366.1_c1	21	83221	1	0.04	722	81734.6	6.56	gi|224140235|ref|XP_002323489.1|	predicted protein [Populus trichocarpa].	722	74.52	1152	0	AT5G03800.1	Pentatricopeptide repeat (PPR) superfamily protein	726	58.4	918	0	sp|Q9FFN1|PP363_ARATH	Pentatricopeptide repeat-containing protein At5g03800 [Arabidopsis thaliana]	726	58.4	918	0	SOLUBLE	NONE		PredHel=0
132	110	1	JT953757.1_1	18	4279	1	1.04	36	4282.09	10.45	-	-	-	-	-	-													SOLUBLE	NONE		PredHel=0
133	111	1	JT938759.1_c1	15	42153	1	0.09	361	41436.9	7.84	gi|255553681|ref|XP_002517881.1|	ring finger protein, putative [Ricinus communis].	377	75.33	518	0	AT5G44280.1	RING 1A	374	55.08	367	3e-122	sp|Q9FKW0|RNG1A_ARATH	Putative E3 ubiquitin-protein ligase RING1a [Arabidopsis thaliana]	374	55.08	367	4e-121	SOLUBLE	NONE		PredHel=0
134	112	1	JT928603.1_c2	15	47995	1	0.08	427	47910.1	10.36	gi|255586323|ref|XP_002533812.1|	conserved hypothetical protein [Ricinus communis].	427	70.49	589	0	AT1G53800.1	-	440	52.05	382	2e-126							SOLUBLE	NONE		PredHel=0
135	113	1	JT936368.1_c3	15	38432	1	0.1	345	38398.1	5.53	gi|255568948|ref|XP_002525444.1|	conserved hypothetical protein [Ricinus communis].	345	84.35	613	0	AT5G18230.1	transcription regulator NOT2/NOT3/NOT5 family protein	348	62.36	392	6e-129	sp|O75175|CNOT3_HUMAN	CCR4-NOT transcription complex subunit 3 [Homo sapiens]	206	47.09	172	1e-46	SOLUBLE	NONE		PredHel=0
136	114	1	JT925987.1_2	15	65234	1	0.06	582	65160.1	5.37	gi|224093862|ref|XP_002310024.1|	predicted protein [Populus trichocarpa].	585	80.51	964	0	AT5G64860.1	disproportionating enzyme	537	75.79	874	0	sp|Q06801|DPEP_SOLTU	4-alpha-glucanotransferase, chloroplastic/amyloplastic [Solanum tuberosum]	585	71.62	883	0	SOLUBLE	NONE		PredHel=0
137	115	1	JT978247.1_c1	14	3420	1	1.36	29	3307.98	9.3	-	-	-	-	-	-													SOLUBLE	NONE		PredHel=0

## Sheet: Sheet2
								NR	TAIR10-pep	Swiss-Prot	SOSUI
Family	Member	Database	Accession	Score	Mass	Sequences	emPAI	Best Hit Definition	Best Hit Definition	Best Hit Definition	Protein Type
1	1	JT2	JT948852.1_c2	5669	21625	7	4.1	REF-like stress related protein 1 [Hevea brasiliensis].	Rubber elongation factor protein (REF)	Stress-related protein [Vitis riparia]	SOLUBLE
2	1	JT2	JT939480.1_c1	4652	26150	9	2.88	REF-like stress related protein 1 [Hevea brasiliensis].	Rubber elongation factor protein (REF)	Rubber elongation factor protein [Hevea]	MEMBRANE
2	2	JT2	JT942555.1_c1	4567	23621	9	3.46	REF-like stress related protein 1 [Hevea brasiliensis].	Rubber elongation factor protein (REF)	Rubber elongation factor protein [Hevea]	MEMBRANE
3	1	JT2	JT951018.1_2	2640	14713	8	5.55	RecName: Full=Rubber elongation factor protein; Short=REF; AltName:	Rubber elongation factor protein (REF)	Rubber elongation factor protein [Hevea]	SOLUBLE
4	1	JT2	JT940643.1_c1	2301	41234	10	2.7	beta-1,3-glucanase [Hevea brasiliensis].	Glycosyl hydrolase superfamily protein	Glucan endo-1,3-beta-glucosidase, basic vacuolar isoform [Hevea brasiliensis]	SOLUBLE
5	1	JT2	JT945746.1_2	2238	29535	15	11.59	conserved hypothetical protein [Ricinus communis].	Undecaprenyl pyrophosphate synthetase family protein	Nogo-B receptor [Homo sapiens]	SOLUBLE
6	1	JT2	JT934730.1_1	1516	48604	12	2.04	predicted protein [Populus trichocarpa].	Senescence/dehydration-associated protein-related	Spartin [Mus musculus]	SOLUBLE
6	2	JT2	JT948017.1_c1	208	24159	2	0.34	conserved hypothetical protein [Ricinus communis].	Senescence/dehydration-associated protein-related	Spartin [Homo sapiens]	SOLUBLE
7	1	JT2	JT927700.1_c3	1627	56162	25	7.33	cytochrome P450, putative [Ricinus communis].	hydroperoxide lyase 1	Allene oxide synthase, chloroplastic [Linum usitatissimum]	SOLUBLE
8	1	JT2	JT949604.1_3	1093	22331	9	3.15	RecName: Full=Small rubber particle protein; Short=SRPP; AltName:	Rubber elongation factor protein (REF)	Small rubber particle protein [Hevea brasiliensis]	SOLUBLE
9	1	JT2	JT940751.1_c1	801	37785	4	0.46	PREDICTED: chlorophyllase-1 [Vitis vinifera].	chlorophyllase 1	Chlorophyllase type 0 [Chenopodium album]	SOLUBLE
10	1	JT2	JT937869.1_c3	558	23973	7	1.81	small GTP-binding protein [Pisum sativum].	Ras-related small GTP-binding family protein	Ras-related protein RABE1c [Arabidopsis thaliana]	SOLUBLE
10	2	JT2	JT944521.1_c3	519	23958	7	1.81	Rab2 [Hevea brasiliensis].	Ras-related small GTP-binding family protein	Ras-related protein RABE1c [Arabidopsis thaliana]	SOLUBLE
10	3	JT2	JT947009.1_3	517	24043	7	1.8	Rab3 [Hevea brasiliensis].	Ras-related small GTP-binding family protein	Ras-related protein RABE1c [Arabidopsis thaliana]	SOLUBLE
10	4	JT2	JT946657.1_3	508	24056	7	1.8	Rab1 [Hevea brasiliensis].	Ras-related small GTP-binding family protein	Ras-related protein RABE1c [Arabidopsis thaliana]	SOLUBLE
10	5	JT2	JT950598.1_c2	425	22771	5	1.54	Rab4 [Hevea brasiliensis].	Ras-related small GTP-binding family protein	Ras-related protein RABD1 [Arabidopsis thaliana]	SOLUBLE
10	6	JT2	JT945059.1_c1	357	22833	6	1.53	small GTPase [Hevea brasiliensis].	RAB GTPase homolog 1C	GTP-binding protein YPTM2 [Zea mays]	SOLUBLE
10	7	JT2	JT944033.1_c3	246	22796	4	0.86	predicted protein [Populus trichocarpa].	RAS 5	Ras-related protein RABD2a [Arabidopsis thaliana]	SOLUBLE
10	8	JT2	JT941172.1_c1	241	23201	6	1.91	PREDICTED: ras-related protein RABH1b-like [Solanum lycopersicum].	Ras-related small GTP-binding family protein	Ras-related protein RABH1b [Arabidopsis thaliana]	SOLUBLE
10	9	JT2	JT945574.1_2	113	23912	2	0.35	predicted protein [Populus trichocarpa].	RAB GTPASE HOMOLOG B18	Ras-related protein RABC1 [Arabidopsis thaliana]	SOLUBLE
11	1	JT2	JT924151.1_c2	495	57374	12	1.57	interferon-induced GTP-binding protein mx, putative [Ricinus	Dynamin related protein 4C	Dynamin-related protein 4C [Arabidopsis thaliana]	SOLUBLE
12	1	JT2	JT957715.1_2	482	17567	8	3.93	REF-like stress related protein 1 [Hevea brasiliensis].	Rubber elongation factor protein (REF)	Small rubber particle protein [Hevea brasiliensis]	MEMBRANE
13	1	JT2	JT945402.1_1	434	22048	11	6.98	PREDICTED: GTP-binding protein SAR1A [Vitis vinifera].	secretion-associated RAS super family 2	GTP-binding protein SAR1A [Arabidopsis thaliana]	SOLUBLE
13	2	JT2	JT943935.1_c1	359	22140	8	3.94	GTP-binding protein sar1, putative [Ricinus communis].	secretion-associated RAS super family 2	GTP-binding protein SAR1A [Arabidopsis thaliana]	SOLUBLE
14	1	JT2	JT943210.1_3	421	33996	7	1.58	RecName: Full=Hevamine-A; Includes: RecName: Full=Chitinase;	chitinase A	Hevamine-A [Hevea]	SOLUBLE
15	1	JT2	JT948343.1_1	399	19613	7	2.5	rubber elongation factor [Hevea brasiliensis].	Rubber elongation factor protein (REF)	Rubber elongation factor protein [Hevea]	SOLUBLE
16	1	JT2	JT927427.1_c1	345	52802	6	0.61	UBX domain-containing protein, putative [Ricinus communis].	UBX domain-containing protein	FAS-associated factor 2-B [Xenopus laevis]	MEMBRANE
16	2	JT2	JT938193.1_3	268	36047	5	0.81	UBX domain-containing protein, putative [Ricinus communis].	UBX domain-containing protein	FAS-associated factor 2-B [Xenopus laevis]	SOLUBLE
17	1	JT2	JT920903.1_2	317	66450	8	0.54	predicted protein [Populus trichocarpa].	ATP citrate lyase subunit B 2	ATP-citrate synthase beta chain protein 1 [Oryza sativa subsp. japonica]	SOLUBLE
18	1	JT2	JT952583.1_c2	256	23563	6	1.46	protein with unknown function [Ricinus communis].	GTP-binding 2	Ras-related protein RABB1b [Arabidopsis thaliana]	SOLUBLE
18	2	JT2	JT941238.1_3	192	10671	4	2.58	protein with unknown function [Ricinus communis].	RAB GTPase homolog B1C	Ras-related protein RABB1c [Arabidopsis thaliana]	SOLUBLE
19	1	JT2	JT943972.1_1	300	23324	9	3.56	predicted protein [Populus trichocarpa].	RAB GTPase homolog G3F	Ras-related protein Rab7 [Pisum]	SOLUBLE
19	2	JT2	JT944915.1_c2	260	23297	8	2.92	predicted protein [Populus trichocarpa].	RAB GTPase homolog G3F	Ras-related protein Rab7 [Pisum]	SOLUBLE
20	1	JT2	JT937325.1_3	296	33119	6	0.91	cis-prenyltransferase [Hevea brasiliensis].	Undecaprenyl pyrophosphate synthetase family protein	Rubber cis-polyprenyltransferase HRT2 [Hevea brasiliensis]	SOLUBLE
21	1	JT2	JT934302.1_2	294	31528	5	0.76	lipase [Ricinus communis].	alpha/beta-Hydrolases superfamily protein	Probable feruloyl esterase A [Aspergillus flavus (strain ATCC 200026 / FGSC A1120 / NRRL 3357 / JCM 12722 / SRRC 167)]	SOLUBLE
22	1	JT2	JT928130.1_1	272	41897	7	0.82	actin 1 [Populus trichocarpa].	actin 7	Actin-7 [Arabidopsis thaliana]	SOLUBLE
23	1	JT2	JT949354.1_c3	262	20724	8	3.6	hypothetical protein 19 [Hevea brasiliensis].	hydroxyproline-rich glycoprotein family protein	D-inositol 3-phosphate glycosyltransferase [Cellulomonas flavigena (strain ATCC 482 / DSM 20109 / NCIB 8073 / NRS 134)]	SOLUBLE
24	1	JT2	JT960545.1_2	223	23777	4	0.81	lipase [Ricinus communis].	alpha/beta-Hydrolases superfamily protein	4-hydroxy-tetrahydrodipicolinate synthase [Cronobacter sakazakii (strain ATCC BAA-894)]	MEMBRANE
25	1	JT2	JT954366.1_3	219	18397	5	2.79	cyclophilin [Hevea brasiliensis].	rotamase CYP 3	Peptidyl-prolyl cis-trans isomerase [Catharanthus roseus]	SOLUBLE
26	1	JT2	JT946133.1_c3	213	24347	4	0.79	Rubber elongation factor protein, putative [Ricinus communis].	Rubber elongation factor protein (REF)	Small rubber particle protein [Hevea brasiliensis]	SOLUBLE
27	1	JT2	JT939205.1_c1	211	27055	6	1.2	Rubber elongation factor protein, putative [Ricinus communis].	Rubber elongation factor protein (REF)	REF/SRPP-like protein At3g05500 [Arabidopsis thaliana]	SOLUBLE
28	1	JT2	JT933643.1_c2	204	40768	6	0.85	conserved hypothetical protein [Ricinus communis].	-	Probable nucleoredoxin 2 [Oryza sativa subsp. japonica]	SOLUBLE
28	2	JT2	JT921591.1_c3	151	81552	6	0.31	conserved hypothetical protein [Ricinus communis].	-	Probable nucleoredoxin 2 [Oryza sativa subsp. japonica]	SOLUBLE
28	3	JT2	JT920223.1_c2	137	73027	6	0.35	conserved hypothetical protein [Ricinus communis].	-	Probable nucleoredoxin 2 [Oryza sativa subsp. japonica]	SOLUBLE
29	1	JT2	JT944240.1_c3	198	24305	5	1.07	protein with unknown function [Ricinus communis].	RAB GTPase homolog A1C	Ras-related protein RABA1c [Arabidopsis thaliana]	SOLUBLE
29	2	JT2	JT948813.1_3	189	22056	5	1.22	predicted protein [Populus trichocarpa].	Ras-related small GTP-binding family protein	Ras-related protein RABF1 [Arabidopsis thaliana]	SOLUBLE
29	3	JT2	JT945020.1_1	177	18166	4	1.16	protein with unknown function [Ricinus communis].	Ras-related small GTP-binding family protein	Ras-related protein RABF1 [Arabidopsis thaliana]	SOLUBLE
29	4	JT2	JT945065.1_1	140	21871	3	0.62	PREDICTED: ras-related protein RABF2b-like [Cucumis sativus].	RAB homolog 1	Ras-related protein RABF2a [Arabidopsis thaliana]	SOLUBLE
29	5	JT2	JT950302.1_1	119	24028	4	0.8	protein with unknown function [Ricinus communis].	RAB GTPase 11C	Ras-related protein RABA2a [Arabidopsis thaliana]	SOLUBLE
30	1	JT2	JT965474.1_c3	178	12782	4	1.94	predicted protein [Populus trichocarpa].	Protein of unknown function, DUF538	Protein ycf2 [Manihot esculenta]	SOLUBLE
31	1	JT2	JT965117.1_c1	177	13973	2	0.64	predicted protein [Populus trichocarpa].		Low-density lipoprotein receptor-related protein [Caenorhabditis elegans]	SOLUBLE
32	1	JT2	JT968048.1_c1	167	11739	4	4.73	PREDICTED: long chain acyl-CoA synthetase 1-like [Glycine max].	AMP-dependent synthetase and ligase family protein	Long chain acyl-CoA synthetase 1 [Arabidopsis thaliana]	SOLUBLE
33	1	JT2	JT928140.1_c2	160	41003	4	0.55	alpha-1,3-mannosyltransferase, putative [Ricinus communis].	UDP-Glycosyltransferase superfamily protein	Alpha-1,3/1,6-mannosyltransferase ALG2 [Dictyostelium discoideum]	SOLUBLE
34	1	JT2	JT945042.1_c1	158	23417	1	0.35	RING-H2 finger protein ATL1Q, putative [Ricinus communis].	RING/U-box superfamily protein	NEP1-interacting protein-like 2 [Arabidopsis thaliana]	SOLUBLE
35	1	JT2	JT940444.1_c1	157	36048	5	0.81	predicted protein [Populus trichocarpa].	Late embryogenesis abundant protein, group 2	Desiccation protectant protein Lea14 homolog [Glycine]	SOLUBLE
35	2	JT2	JT935349.1_c1	126	35863	4	0.65	predicted protein [Populus trichocarpa].	Late embryogenesis abundant protein, group 2	Desiccation protectant protein Lea14 homolog [Glycine]	SOLUBLE
36	1	JT2	JT942256.1_3	141	23154	2	0.36	HEV2.2 [Hevea brasiliensis].	pathogenesis-related 4	Pro-hevein [Hevea brasiliensis]	MEMBRANE
37	1	JT2	JT918183.1_3	135	104855	3	0.11	eukaryotic translation initiation factor 2c, putative [Ricinus	Stabilizer of iron transporter SufD / Polynucleotidyl transferase	Protein argonaute 1 [Arabidopsis thaliana]	SOLUBLE
38	1	JT2	JT942264.1_c1	133	25638	3	0.51	Small rubber particle protein, putative [Ricinus communis].	Rubber elongation factor protein (REF)	REF/SRPP-like protein At1g67360 [Arabidopsis thaliana]	SOLUBLE
39	1	JT2	JT933735.1_c1	128	25104	2	0.33	protein with unknown function [Ricinus communis].	RAB GTPase homolog A4C	Ras-related protein RABA4c [Arabidopsis thaliana]	SOLUBLE
40	1	JT2	JT920502.1_3	128	77111	4	0.21	long-chain-fatty-acid CoA ligase, putative [Ricinus communis].	long chain acyl-CoA synthetase 9	Long chain acyl-CoA synthetase 9, chloroplastic [Arabidopsis thaliana]	MEMBRANE
41	1	JT2	JT948104.1_c1	124	20838	3	0.66	ADP-ribosylation factor, putative [Ricinus communis].	ADP-ribosylation factor-like A1C	ADP-ribosylation factor-like protein 8A [Gallus gallus]	SOLUBLE
42	1	JT2	JT949986.1_c2	120	21143	5	1.31	abhydrolase domain containing, putative [Ricinus communis].	alpha/beta-Hydrolases superfamily protein	Monoacylglycerol lipase ABHD6 [Homo sapiens]	SOLUBLE
43	1	JT2	JT920030.1_3	120	80960	7	0.37	eukaryotic translation initiation factor 2c, putative [Ricinus	Argonaute family protein	Protein argonaute 5 [Arabidopsis thaliana]	SOLUBLE
44	1	JT2	JT942882.1_2	120	20752	1	0.4	ADP-ribosylation factor [Elaeis guineensis].	ADP-ribosylation factor A1F	ADP-ribosylation factor 2 [Oryza sativa subsp. japonica]	SOLUBLE
45	1	JT2	JT945335.1_c1	118	18336	2	0.78	heat-shock protein, putative [Ricinus communis].	HSP20-like chaperones superfamily protein	18.5 kDa class I heat shock protein [Glycine max]	SOLUBLE
46	1	JT2	JT916348.1_c3	116	52650	4	0.32	conserved hypothetical protein [Ricinus communis].	RabGAP/TBC domain-containing protein	TBC1 domain family member 15 [Homo sapiens]	MEMBRANE
47	1	JT2	JT936371.1_1	109	45194	3	0.27	PREDICTED: abhydrolase domain-containing protein 4-like [Cucumis	alpha/beta-Hydrolases superfamily protein	probable cardiolipin-specific deacylase, mitochondrial [Schizosaccharomyces pombe (strain 972 / ATCC 24843)]	SOLUBLE
48	1	JT2	JT968387.1_c1	106	18017	3	0.79	long-chain-fatty-acid CoA ligase, putative [Ricinus communis].	AMP-dependent synthetase and ligase family protein	Long chain acyl-CoA synthetase 1 [Arabidopsis thaliana]	SOLUBLE
49	1	JT2	JT964269.1_c1	105	19956	2	0.42	PREDICTED: long chain acyl-CoA synthetase 1-like [Glycine max].	AMP-dependent synthetase and ligase family protein	Long chain acyl-CoA synthetase 1 [Arabidopsis thaliana]	SOLUBLE
50	1	JT2	JT918520.1_c2	103	92529	4	0.17	phopholipase d alpha, putative [Ricinus communis].	phospholipase D alpha 2	Phospholipase D alpha 1 [Ricinus communis]	SOLUBLE
51	1	JT2	JT920291.1_2	96	87292	2	0.09	RecName: Full=Cycloartenol synthase; Short=RcCAS.	cycloartenol synthase 1	Cycloartenol synthase [Ricinus]	SOLUBLE
52	1	JT2	JT919744.1_c2	96	68017	2	0.11	ligatin, putative [Ricinus communis].	eukaryotic translation initiation factor SUI1 family protein	Eukaryotic translation initiation factor 2D [Rattus norvegicus]	SOLUBLE
53	1	JT2	JT938614.1_2	95	23702	2	0.35	predicted protein [Populus trichocarpa].	RAB GTPASE HOMOLOG B18	Ras-related protein RABC1 [Arabidopsis thaliana]	SOLUBLE
54	1	JT2	JT946100.1_c2	93	21378	1	0.18	conserved hypothetical protein [Ricinus communis].	Clathrin light chain protein	Clathrin light chain 3 [Arabidopsis thaliana]	SOLUBLE
55	1	JT2	JT935611.1_2	91	34585	4	0.51	hypothetical protein PRUPE_ppa008401mg [Prunus persica].	Oxidoreductase, zinc-binding dehydrogenase family protein	Putative quinone-oxidoreductase homolog, chloroplastic [Arabidopsis thaliana]	SOLUBLE
56	1	JT2	JT954184.1_2	87	16340	1	0.24	40S ribosomal protein S14, putative [Ricinus communis].	Ribosomal protein S11 family protein	40S ribosomal protein S14-3 [Arabidopsis thaliana]	SOLUBLE
57	1	JT2	JT924463.1_3	81	58144	1	0.06	PREDICTED: pyruvate kinase, cytosolic isozyme-like [Vitis	Pyruvate kinase family protein	Pyruvate kinase, cytosolic isozyme [Glycine]	SOLUBLE
58	1	JT2	JT928738.1_1	81	37240	2	0.21	glyceraldehyde 3-phosphate dehydrogenase, putative [Ricinus	glyceraldehyde-3-phosphate dehydrogenase C subunit 1	Glyceraldehyde-3-phosphate dehydrogenase, cytosolic [Antirrhinum majus]	SOLUBLE
59	1	JT2	JT946910.1_c1	80	34977	1	0.11	predicted protein [Populus trichocarpa].	basic chitinase	Endochitinase [Phaseolus]	MEMBRANE
60	1	JT2	JT918758.1_c3	79	39707	1	0.09	long-chain acyl-CoA synthetase 4 [Ricinus communis].	AMP-dependent synthetase and ligase family protein	Long chain acyl-CoA synthetase 4 [Arabidopsis thaliana]	SOLUBLE
61	1	JT2	JT932779.1_c1	75	41021	1	0.09	PREDICTED: 26S proteasome regulatory subunit 4 homolog A-like	regulatory particle AAA-ATPase 2A	26S proteasome regulatory subunit 4 homolog A [Arabidopsis thaliana]	SOLUBLE
62	1	JT2	JT914648.1_c1	73	174610	1	0.02	myosin XI, putative [Ricinus communis].	myosin, putative	Myosin-J heavy chain [Dictyostelium discoideum]	SOLUBLE
63	1	JT2	JT925528.1_1	70	57791	1	0.06	predicted protein [Populus trichocarpa].	Pyruvate kinase family protein	Pyruvate kinase, cytosolic isozyme [Glycine]	SOLUBLE
64	1	JT2	JT939513.1_1	69	13177	1	0.3	hypothetical protein RCOM_1715180 [Ricinus communis].	methionine sulfoxide reductase B 1	Peptide methionine sulfoxide reductase B1, chloroplastic [Arabidopsis thaliana]	SOLUBLE
65	1	JT2	JT918818.1_2	66	94855	2	0.08	PREDICTED: dynamin-2B [Vitis vinifera].	dynamin-like 3	Dynamin-2B [Arabidopsis thaliana]	SOLUBLE
66	1	JT2	JT922608.1_2	66	54393	1	0.07	predicted protein [Populus trichocarpa].	UDP-Glycosyltransferase superfamily protein	Chitobiosyldiphosphodolichol beta-mannosyltransferase [Mus musculus]	MEMBRANE
67	1	JT2	JT962900.1_c2	65	10313	3	1.68	acyl-CoA-binding protein [Camellia sinensis].	acyl-CoA-binding protein 6	Acyl-CoA-binding protein [Ricinus]	SOLUBLE
68	1	JT2	JT922578.1_1	63	69198	2	0.11	dynamin, putative [Ricinus communis].	DYNAMIN-like 1E	Dynamin-related protein 1E [Arabidopsis thaliana]	SOLUBLE
68	2	JT2	JT919755.1_c2	52	35841	2	0.22	PREDICTED: dynamin-related protein 1E isoform 2 [Vitis vinifera].	DYNAMIN-like 1E	Dynamin-related protein 1E [Arabidopsis thaliana]	SOLUBLE
69	1	JT2	JT929990.1_c1	61	46784	2	0.17	predicted protein [Populus trichocarpa].	G protein coupled receptor	LanC-like protein 2 [Mus musculus]	SOLUBLE
70	1	JT2	JT932528.1_c1	59	36099	1	0.1	conserved hypothetical protein [Ricinus communis].	Saccharopine dehydrogenase	Probable mitochondrial saccharopine dehydrogenase-like oxidoreductase At5g39410 [Arabidopsis thaliana]	SOLUBLE
71	1	JT2	JT931129.1_3	57	49697	3	0.24	RecName: Full=Elongation factor 1-alpha; Short=EF-1-alpha.	GTP binding Elongation factor Tu family protein	Elongation factor 1-alpha [Manihot esculenta]	SOLUBLE
72	1	JT2	JT948536.1_c2	55	22740	1	0.17	putative SNARE protein [Hevea brasiliensis].	SNARE-like superfamily protein	VAMP-like protein YKT61 [Arabidopsis thaliana]	SOLUBLE
73	1	JT2	JT918804.1_c1	54	82832	1	0.04	zinc ion binding protein, putative [Ricinus communis].	ubiquitin-associated (UBA)/TS-N domain-containing protein / octicosapeptide/Phox/Bemp1 (PB1) domain-containing protein	Uncharacterized protein C6orf106 homolog [Danio rerio]	SOLUBLE
74	1	JT2	JT930507.1_c1	53	54507	1	0.07	Sphingosine kinase, putative [Ricinus communis].	sphingosine kinase 1	Sphingosine kinase 1 [Homo sapiens]	SOLUBLE
75	1	JT2	JT914456.1_c2	52	194165	1	0.02	clathrin heavy chain, putative [Ricinus communis].	Clathrin, heavy chain	Clathrin heavy chain 1 [Arabidopsis thaliana]	MEMBRANE
76	1	JT2	JT941244.1_c3	51	21863	1	0.18	ADP-ribosylation factor, arf, putative [Ricinus communis].	ADP-ribosylation factor B1B	ADP-ribosylation factor [Dugesia]	SOLUBLE
77	1	JT2	JT921291.1_1	49	68488	1	0.05	dynamin, putative [Ricinus communis].	dynamin-like protein	Dynamin-related protein 5A [Glycine]	SOLUBLE
78	1	JT2	JT918921.1_c1	49	81080	1	0.05	long-chain-fatty-acid CoA ligase, putative [Ricinus communis].	AMP-dependent synthetase and ligase family protein	Long chain acyl-CoA synthetase 8 [Arabidopsis thaliana]	MEMBRANE
79	1	JT2	JT948689.1_c1	49	20987	1	0.18	60S ribosomal protein L18, putative [Ricinus communis].	ribosomal protein L18	60S ribosomal protein L18-2 [Arabidopsis thaliana]	SOLUBLE
80	1	JT2	JT940960.1_c3	49	20094	1	0.19	calcineurin-like protein [Hevea brasiliensis].	Calcium-binding EF-hand family protein	Calcineurin subunit B [Naegleria gruberi]	SOLUBLE
81	1	JT2	JT928471.1_c3	46	58054	1	0.06	predicted protein, partial [Populus trichocarpa].	sulfoquinovosyldiacylglycerol 2	GDP-mannose-dependent alpha-mannosyltransferase [Corynebacterium glutamicum (strain ATCC 13032 / DSM 20300 / JCM 1318 / LMG 3730 / NCIMB 10025)]	MEMBRANE
82	1	JT2	JT955224.1_3	46	18218	1	0.21	predicted protein [Populus trichocarpa].	MMS ZWEI homologue 1	Ubiquitin-conjugating enzyme E2 variant 1A [Arabidopsis thaliana]	SOLUBLE
83	1	JT2	JT963368.1_c1	44	17523	1	0.22	predicted protein [Populus trichocarpa].	HSP20-like chaperones superfamily protein	18.5 kDa class I heat shock protein [Glycine max]	SOLUBLE
84	1	JT2	JT938754.1_3	43	35322	3	0.36	short-chain dehydrogenase, putative [Ricinus communis].	NAD(P)-binding Rossmann-fold superfamily protein	Dehydrogenase/reductase SDR family member 12 [Bos taurus]	SOLUBLE
85	1	JT2	JT922944.1_c2	43	61576	1	0.06	heat shock protein 70 [Gossypium hirsutum].	heat shock protein 70	Heat shock cognate 70 kDa protein [Petunia hybrida]	SOLUBLE
86	1	JT2	JT944943.1_3	43	24986	2	0.33	hypothetical protein PRUPE_ppa011070mg [Prunus persica].	RAB GTPase homolog A4A	Ras-related protein Rab11D [Nicotiana tabacum]	SOLUBLE
87	1	JT2	JT955813.1_3	42	13914	1	0.28	40S ribosomal protein S20, putative [Ricinus communis].	Ribosomal protein S10p/S20e family protein	40S ribosomal protein S20-1 [Arabidopsis thaliana]	SOLUBLE
88	1	JT2	JT956472.1_2	42	18436	1	0.21	heat-shock protein, putative [Ricinus communis].	HSP20-like chaperones superfamily protein	18.5 kDa class I heat shock protein [Glycine max]	SOLUBLE
89	1	JT2	JT929066.1_3	41	50535	1	0.07	Polyphenol oxidase, chloroplast precursor, putative [Ricinus	cytochrome P450, family 79, subfamily F, polypeptide 2	Polyphenol oxidase, chloroplastic [Malus]	SOLUBLE
90	1	JT2	JT952515.1_2	40	17266	2	0.5	PREDICTED: ubiquitin-conjugating enzyme E2 35 isoform 1 [Vitis	ubiquitin-conjugating enzyme 35	Ubiquitin-conjugating enzyme E2 35 [Arabidopsis thaliana]	SOLUBLE
91	1	JT2	JT948404.1_1	38	26624	1	0.14	predicted protein [Populus trichocarpa].	-	Multiple myeloma tumor-associated protein 2 homolog [Mus musculus]	SOLUBLE
92	1	JT2	JT938456.1_2	37	34750	1	0.11	unnamed protein product, partial [Vitis vinifera].	RNA-binding (RRM/RBD/RNP motifs) family protein	Heterogeneous nuclear ribonucleoprotein 1 [Arabidopsis thaliana]	SOLUBLE
93	1	JT2	JT925995.1_2	37	46431	1	0.08	type II metacaspase [Hevea brasiliensis].	metacaspase 4	Metacaspase-4 [Arabidopsis thaliana]	SOLUBLE
94	1	JT2	JT919498.1_c3	36	74559	1	0.05	Zuotin, putative [Ricinus communis].	DnaJ domain ;Myb-like DNA-binding domain	DnaJ homolog subfamily C member 2 [Bos taurus]	SOLUBLE
95	1	JT2	JT948023.1_3	36	22683	1	0.17	SNF7 family protein [Arabidopsis lyrata subsp. lyrata].	vacuolar protein sorting 46.1	Charged multivesicular body protein 1 [Dictyostelium discoideum]	SOLUBLE
96	1	JT2	JT916383.1_c1	36	95794	1	0.04	predicted protein [Populus trichocarpa].	-	Protein DDB_G0276689 [Dictyostelium discoideum]	SOLUBLE
97	1	JT2	JT934165.1_3	34	33950	1	0.11	conserved hypothetical protein [Ricinus communis].	HSP20-like chaperones superfamily protein		SOLUBLE
98	1	JT2	JT944400.1_c2	34	18544	1	0.21	ARF GTPase activator, putative [Ricinus communis].	Calcium-dependent lipid-binding (CaLB domain) family protein	Probable ADP-ribosylation factor GTPase-activating protein AGD13 [Arabidopsis thaliana]	SOLUBLE
99	1	JT2	JT949571.1_3	32	17703	1	0.22	eukaryotic translation initiation factor 5A isoform VIII, partial	eukaryotic elongation factor 5A-1	Eukaryotic translation initiation factor 5A [Manihot]	SOLUBLE
100	1	JT2	JT916142.1_1	28	64578	1	0.06	grr1, plant, putative [Ricinus communis].	EIN3-binding F box protein 1	EIN3-binding F-box protein 1 [Arabidopsis thaliana]	SOLUBLE
101	1	JT2	JT955341.1_1	27	12776	1	0.31	eukaryotic translation initiation factor 3 [Hevea brasiliensis].	Translation initiation factor SUI1 family protein	Protein translation factor SUI1 homolog 1 [Arabidopsis thaliana]	SOLUBLE
102	1	JT2	JT915583.1_c1	26	130208	1	0.03	ATP binding protein, putative [Ricinus communis].	Protein kinase superfamily protein	Dual specificity tyrosine-phosphorylation-regulated kinase 4 [Homo sapiens]	SOLUBLE
103	1	JT2	JT917100.1_3	26	101754	1	0.04	pentatricopeptide repeat-containing protein, putative [Ricinus	Tetratricopeptide repeat (TPR)-like superfamily protein	Pentatricopeptide repeat-containing protein At4g04790, mitochondrial [Arabidopsis thaliana]	SOLUBLE
104	1	JT2	JT944359.1_c1	24	15125	1	0.26	hypothetical protein PRUPE_ppa006689mg [Prunus persica].	Phospholipid/glycerol acyltransferase family protein	Lysophosphatidylcholine acyltransferase 1 [Mus musculus]	MEMBRANE
105	1	JT2	JT919502.1_1	23	68515	1	0.05	delta 1-pyrroline-5-carboxylate synthetase [Jatropha curcas].	delta 1-pyrroline-5-carboxylate synthase 2	Delta-1-pyrroline-5-carboxylate synthase [Actinidia]	SOLUBLE
106	1	JT2	JT929875.1_c2	22	27557	1	0.14	multidrug resistance pump, putative [Ricinus communis].	MATE efflux family protein	Protein TRANSPARENT TESTA 12 [Arabidopsis thaliana]	MEMBRANE
107	1	JT2	JT938924.1_c3	22	37397	1	0.1	dihydroflavonal-4-reductase, putative [Ricinus communis].	NAD(P)-binding Rossmann-fold superfamily protein	Putative dihydroflavonol-4-reductase [Synechocystis sp. (strain PCC 6803 / Kazusa)]	SOLUBLE
108	1	JT2	JT932200.1_3	22	51908	1	0.07	conserved hypothetical protein [Ricinus communis].	IQ-domain 23	Protein IQ-DOMAIN 14 [Arabidopsis thaliana]	SOLUBLE
109	1	JT2	JT916366.1_c1	21	83221	1	0.04	predicted protein [Populus trichocarpa].	Pentatricopeptide repeat (PPR) superfamily protein	Pentatricopeptide repeat-containing protein At5g03800 [Arabidopsis thaliana]	SOLUBLE
110	1	JT2	JT953757.1_1	18	4279	1	1.04	-			SOLUBLE
111	1	JT2	JT938759.1_c1	15	42153	1	0.09	ring finger protein, putative [Ricinus communis].	RING 1A	Putative E3 ubiquitin-protein ligase RING1a [Arabidopsis thaliana]	SOLUBLE
112	1	JT2	JT928603.1_c2	15	47995	1	0.08	conserved hypothetical protein [Ricinus communis].	-		SOLUBLE
113	1	JT2	JT936368.1_c3	15	38432	1	0.1	conserved hypothetical protein [Ricinus communis].	transcription regulator NOT2/NOT3/NOT5 family protein	CCR4-NOT transcription complex subunit 3 [Homo sapiens]	SOLUBLE
114	1	JT2	JT925987.1_2	15	65234	1	0.06	predicted protein [Populus trichocarpa].	disproportionating enzyme	4-alpha-glucanotransferase, chloroplastic/amyloplastic [Solanum tuberosum]	SOLUBLE
115	1	JT2	JT978247.1_c1	14	3420	1	1.36	-			SOLUBLE
